# Supplementary material for: Electrochemical synthesis of nitrosation compounds using CH3NO2 as a nitroso reagent
Source: Royal Society of Chemistry journal article supplement (doi:10.1039/d4cc05521g), 2024-12-10

# Supplementary Information

## Electrochemical Synthesis of Nitrosation Compounds Using $\text{CH}_3\text{NO}_2$ as A Nitroso Reagent

Rong Deng,<sup>a</sup> Kai Li,<sup>a</sup> Zhenggen Zha,<sup>a</sup> Qi Sun<sup>\*b</sup> and Zhiyong Wang<sup>\*a,b</sup>

<sup>a</sup>Hefei National Center for Physical Sciences at Microscale, Key Laboratory of Precision and Intelligent Chemistry, School of Chemistry and Materials Science, University of Science and Technology of China, Hefei 230026, China.

<sup>a</sup>E-mail: zwang3@ustc.edu.cn.

<sup>b</sup>Institute of Advanced Technology, University of Science and Technology of China, Hefei 230000, China.

<sup>b</sup>E-mail: sunqi924@ustc.edu.cn.

### Table of Contents

|                                                   |     |
|---------------------------------------------------|-----|
| 1、 General Information .....                      | S2  |
| 2、 Experimental Procedure .....                   | S2  |
| 3、 Optimization of Reaction Conditions.....       | S4  |
| 4、 Scope of Amines for <i>N</i> -Nitrosation..... | S5  |
| 5、 Mechanistic Experiments .....                  | S11 |
| 6、 Control Experiments .....                      | S12 |
| 7、 Proposed possible reaction mechanism .....     | S16 |
| 8、 Detail Descriptions for Products.....          | S17 |
| 9、 Supporting Reference .....                     | S23 |
| 10、 Copies of Product NMR Spectra .....           | S24 |

# 1、General Information

Unless otherwise noted, materials were obtained from commercial suppliers and used without further purification. NMR spectra were recorded on a Bruker AV-500 ( $^1\text{H}$ : 500 MHz,  $^{13}\text{C}$ : 125 MHz,  $^{19}\text{F}$  NMR: 470 MHz) spectrometer using TMS as internal reference. Chemical shifts ( $\delta$ ) and coupling constants ( $J$ ) were expressed in ppm and Hz, respectively. GC-MS was Shimadzu QP-5050 GC-MS system. Commercially available compounds were used without further purification. All substances were known available compounds. High resolution mass spectra (HRMS) were measured using electrospray ionization (ESI) and the time-of-flight (TOF) mass analyzer. The anode electrode and cathode electrode are carbon electrode and nickel electrode, respectively. These electrodes are commercially available from GaossUnion, China.

## 2、Experimental Procedure

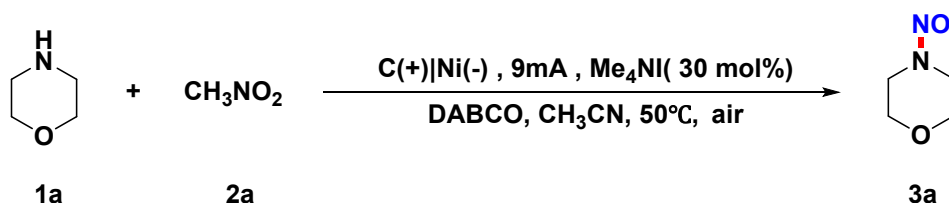

**Typical synthesis steps of *N*-nitrosomorpholine (3a):** A mixture of morpholine (0.3 mmol), nitromethane (0.45 mmol),  $\text{Me}_4\text{NI}$  (0.09 mmol) and DABCO (0.2 mmol) and  $\text{CH}_3\text{CN} = 6$  ml were added to an undivided electrolytic cell. The electrolytic cell was equipped with a carbon electrode as anode and a nickel electrode as cathode. The reaction mixture was stirred and electrolyzed at a constant current of 9 mA under  $50^\circ\text{C}$  for corresponding time. When the reaction was finished, the solution was extracted with EtOAc ( $3 \times 10$  mL). The combined organic layer was dried with  $\text{Na}_2\text{SO}_4$ , filtered. The solvent was removed with a rotary evaporator. The residue was purified by column chromatography on silica gel (PE/EtOAc = 3:1) to afford the desired product.

**Gram-scale synthesis of *N*-nitrosomorpholine (3a):** A mixture of morpholine (10 mmol), nitromethane (15 mmol),  $\text{Me}_4\text{NI}$  (3 mmol) and DABCO (6 mmol) and  $\text{CH}_3\text{CN} = 200$  ml were added to an undivided electrolytic cell. The electrolytic cell was equipped with a carbon electrode as anode and a nickel electrode as cathode. The reaction mixture was stirred and electrolyzed at a constant current of 27 mA under  $50^\circ\text{C}$  for 29 h. When the reaction was completed, the solution was extracted with EtOAc ( $3 \times 100$  mL). The combined organic layer was dried with  $\text{Na}_2\text{SO}_4$ , filtered. The

solvent was removed with a rotary evaporator. The residue was purified by column chromatography on silica gel (PE/EtOAc = 3:1) to afford the desired product.



## 4、 Scope of Amines for N-Nitrosation

### (1) Scheme S2: Partial substrate expansion.

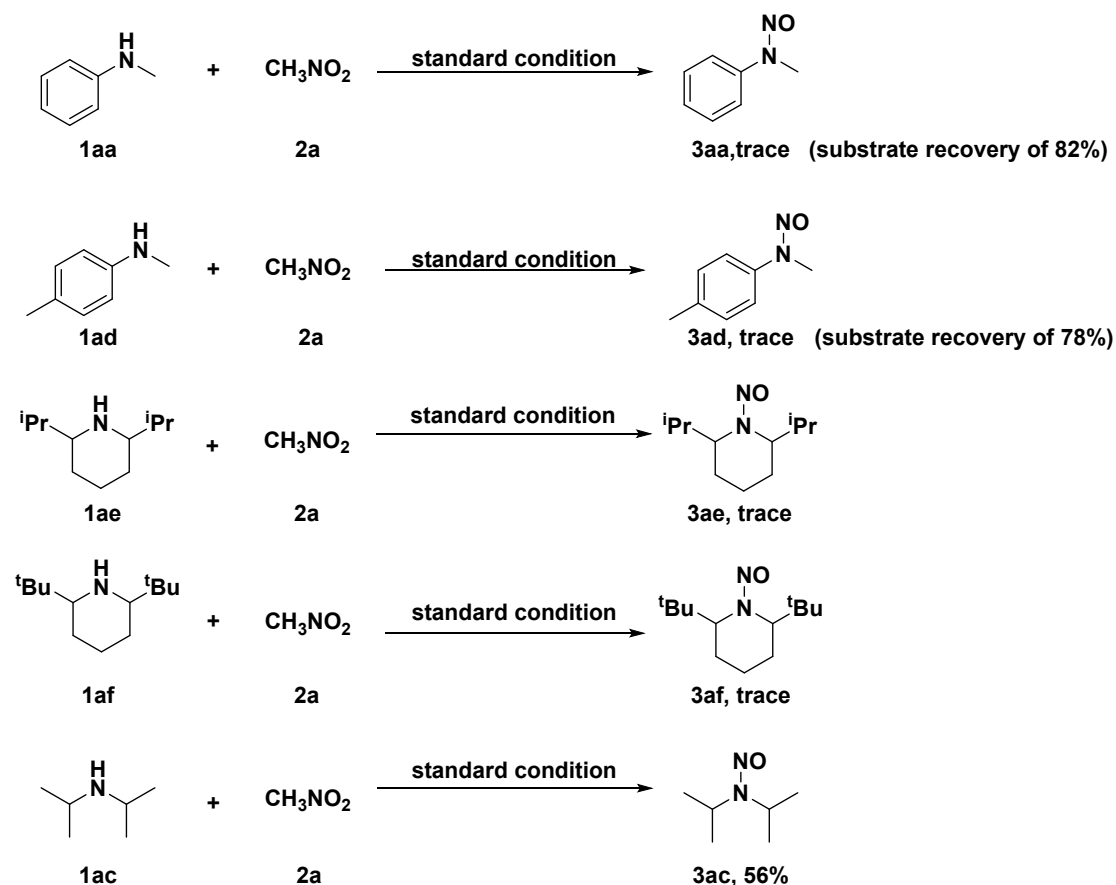

In the study of the substrate applicability range of secondary amines, the reactivity of some aromatic secondary amines is poor, such as **3aa** and **3ad**, which did not obtain the target product under standard conditions, but obtained the corresponding raw materials with high recovery rates. At the same time, when we increase the steric hindrance of the substrate, the change in yield is more significant. When the substituents are isopropyl and tert butyl, the reaction is almost impossible to proceed (**3ae-3af**). When the substituent of the chain like secondary amine is changed to isopropyl, the target product (**3ac**) is obtained with a yield of 56%.

## (2) NMR data and spectra of 3ac

### N,N-diisopropylnitrous amide (3ac)

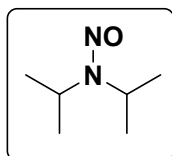

The title compound was prepared according to the general working procedure and purified by column chromatography (petroleum ether/ethyl acetate = 8:1) to give the product as a yellow oil. 56% yield, 21.8mg.  $^1\text{H}$  NMR (500 MHz, Chloroform-*d*)  $\delta$  5.04 (hept,  $J = 6.9$  Hz, 1H), 4.27 (hept,  $J = 6.8$  Hz, 1H), 1.52 (d,  $J = 6.8$  Hz, 6H), 1.18 (d,  $J = 6.9$  Hz, 6H).  $^{13}\text{C}$  NMR (125 MHz, Chloroform-*d*)  $\delta$  50.4, 44.5, 23.7, 19.0.

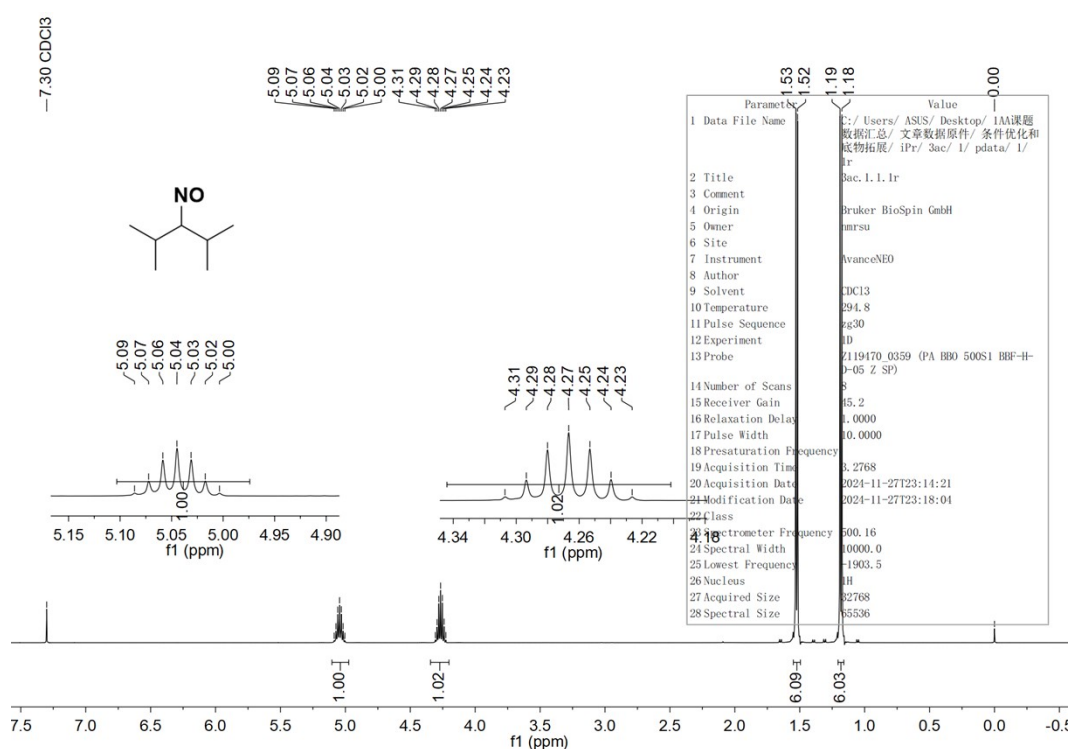

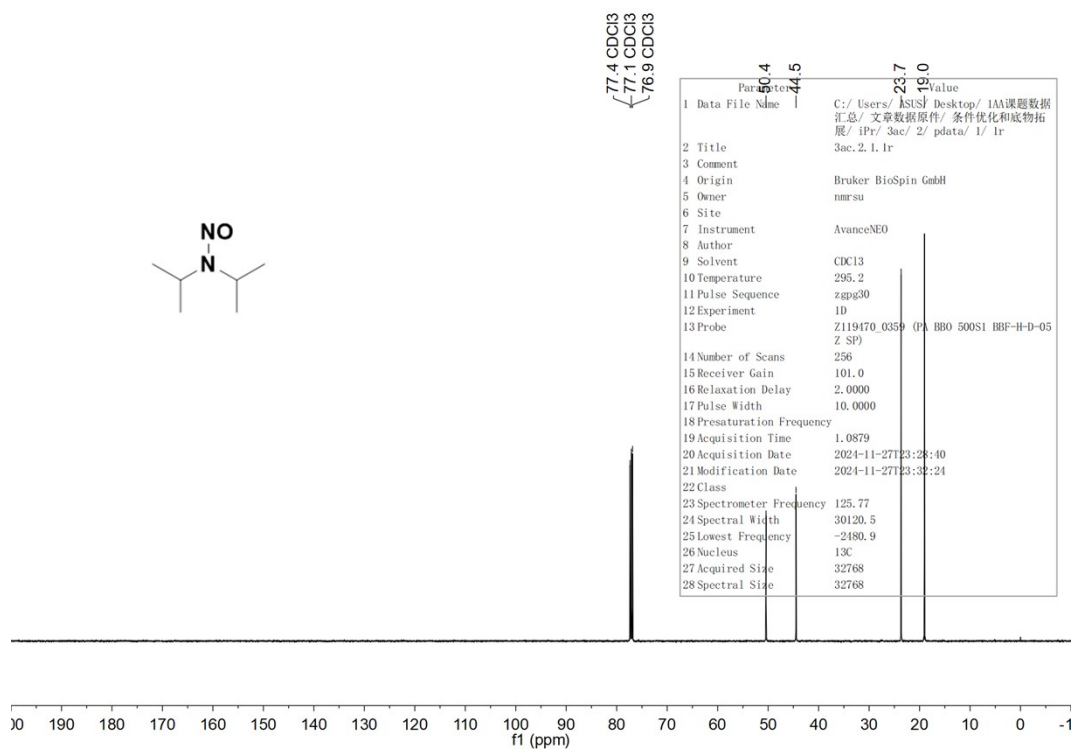

### (3) DFT calculations (Gaussian 16W) of 3e.

(a) Fig. S3: Stereoscopic configuration diagram of 3e.

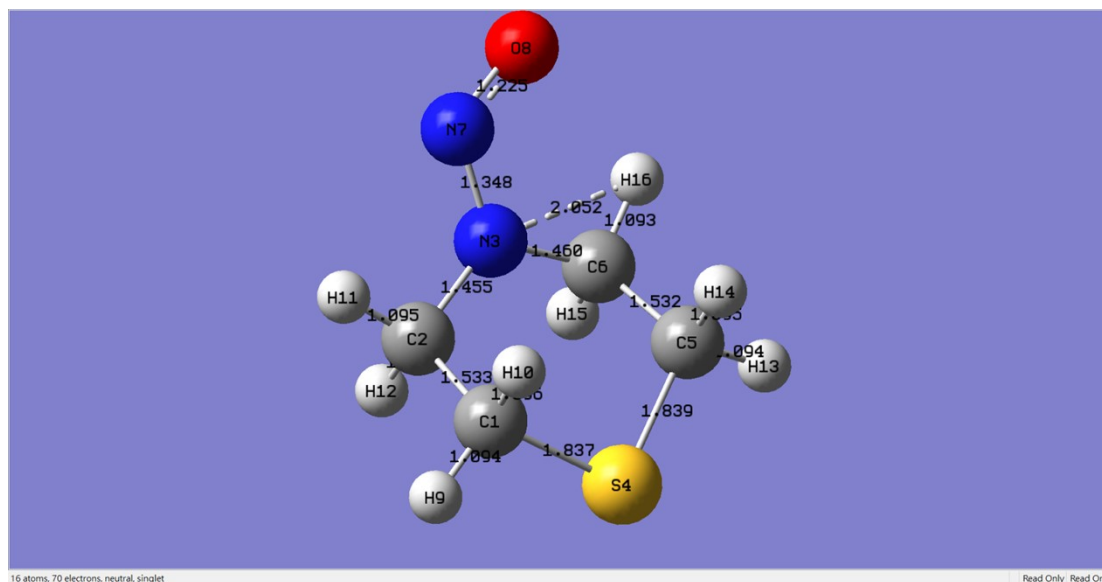

(b) Fig. S4: The formation of the hydrogen bond of *N-N=O* group with the adjacent Hydrogens.

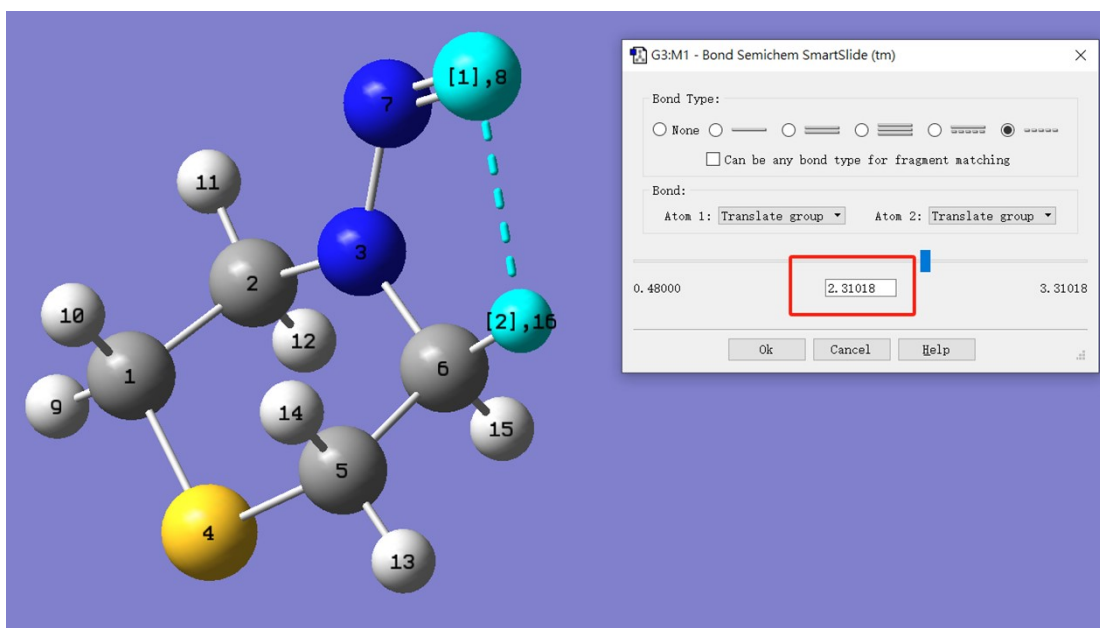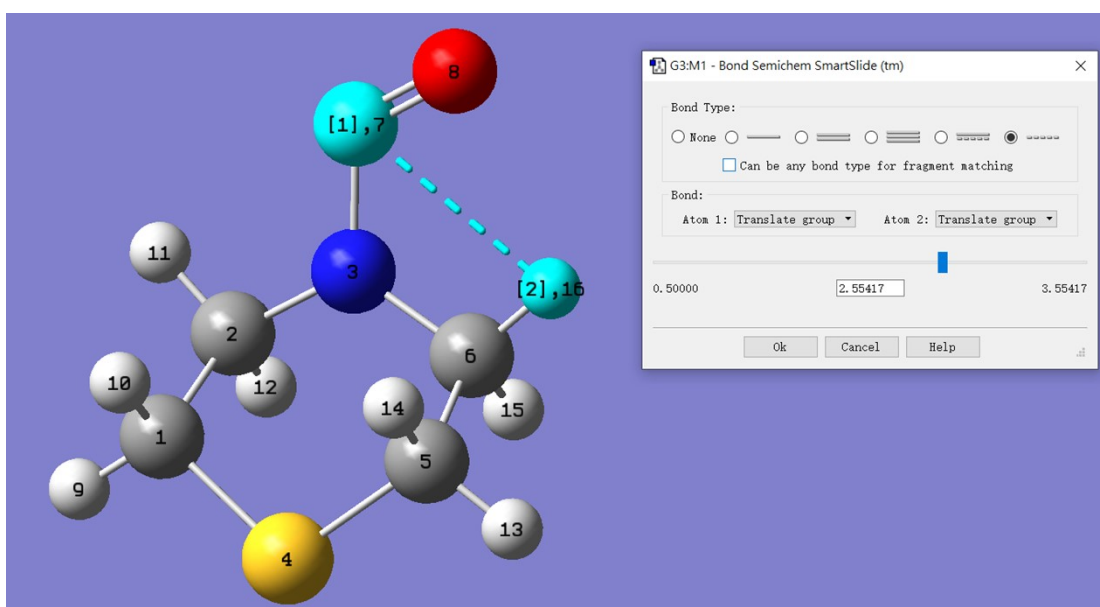

**(c) Scheme S3: All data on distances between atoms.**

Distance matrix (angstroms):

|   |   | 1        | 2        | 3        | 4 | 5 |
|---|---|----------|----------|----------|---|---|
| 1 | C | 0.000000 |          |          |   |   |
| 2 | C | 1.532676 | 0.000000 |          |   |   |
| 3 | N | 2.472299 | 1.454688 | 0.000000 |   |   |



|    |   |          |          |          |          |          |
|----|---|----------|----------|----------|----------|----------|
| 4  | S | 1.836879 | 2.800897 | 3.147151 | 0.000000 |          |
| 5  | C | 2.757362 | 3.047430 | 2.471056 | 1.838590 | 0.000000 |
| 6  | C | 3.055601 | 2.525590 | 1.460338 | 2.806674 | 1.531831 |
| 7  | N | 3.446502 | 2.381320 | 1.347716 | 4.374917 | 3.513576 |
| 8  | O | 4.429463 | 3.488967 | 2.181203 | 5.039068 | 3.769282 |
| 9  | H | 1.094097 | 2.168130 | 3.411641 | 2.387513 | 3.725950 |
| 10 | H | 1.095647 | 2.169947 | 2.772015 | 2.434574 | 2.994813 |
| 11 | H | 2.176178 | 1.094516 | 2.051601 | 3.774074 | 4.005325 |
| 12 | H | 2.166345 | 1.097513 | 2.092115 | 3.023157 | 3.472848 |
| 13 | H | 3.724790 | 4.035018 | 3.412031 | 2.387280 | 1.094077 |
| 14 | H | 2.994497 | 3.435700 | 2.772917 | 2.434165 | 1.095278 |
| 15 | H | 3.478781 | 2.818785 | 2.089495 | 3.032393 | 2.170300 |
| 16 | H | 4.008520 | 3.397491 | 2.052231 | 3.779519 | 2.178578 |

6 7 8 9 10

|    |   |          |          |          |          |          |
|----|---|----------|----------|----------|----------|----------|
| 6  | C | 0.000000 |          |          |          |          |
| 7  | N | 2.473177 | 0.000000 |          |          |          |
| 8  | O | 2.689200 | 1.225110 | 0.000000 |          |          |
| 9  | H | 4.042953 | 4.339651 | 5.408428 | 0.000000 |          |
| 10 | H | 3.441522 | 3.416595 | 4.320962 | 1.774779 | 0.000000 |
| 11 | H | 3.402417 | 2.366618 | 3.589400 | 2.552128 | 2.478575 |
| 12 | H | 2.824994 | 3.111932 | 4.142225 | 2.469004 | 3.073425 |
| 13 | H | 2.166847 | 4.430671 | 4.499523 | 4.599093 | 4.012458 |
| 14 | H | 2.170135 | 3.488358 | 3.628012 | 4.013241 | 2.817158 |
| 15 | H | 1.096750 | 3.179706 | 3.444993 | 4.295059 | 4.124398 |
| 16 | H | 1.092970 | 2.507965 | 2.194382 | 5.041563 | 4.207651 |



## 5、Mechanistic Experiments

### Cyclic Voltammetry Studies

Cyclic voltammetry data were measured with a Shanghai Chenhua potentiostat (CHI760E).

**Working electrode:** The working electrode is a 3 mm diameter Pt disk working electrode. Polished with 0.3  $\mu\text{m}$  aluminum oxide and then sonicated in distilled water before drying.

**Reference electrode:** The reference electrode consisted of a silver wire covered with silver chloride immersed in a saturated solution of potassium chloride.

**Counter electrode:** The counter electrode is a platinum wire that was polished with sand paper.

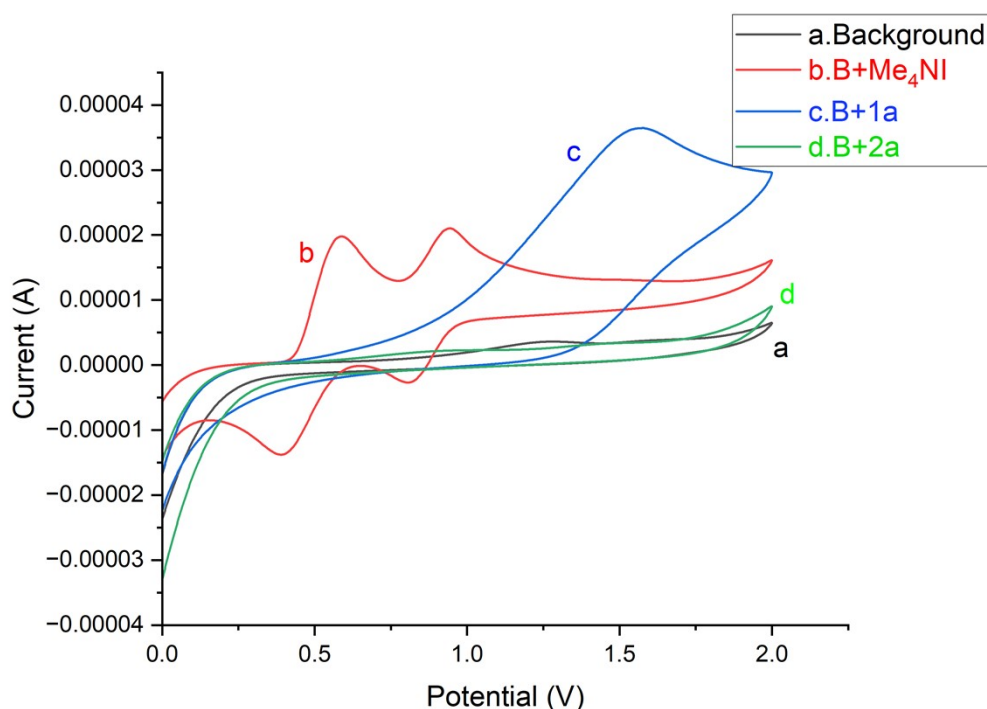

**Fig 2.** Cyclic voltammograms of **1a**, **2a** and Me<sub>4</sub>NI in 0.1 M NH<sub>4</sub>BF<sub>4</sub>/CH<sub>3</sub>CN using a Pt disk as the working electrode, and Pt wire and Ag/AgCl as the counter and reference electrodes, respectively, at a scan rate of 100 mV/s: background (curve **a**), Me<sub>4</sub>NI (0.002 M) (curve **b**), **1a** (0.005 M) (curve **c**) and **2a** (0.005 M) (curve **d**).

## 6 □ Control Experiments

Scheme S4: Control experiments.

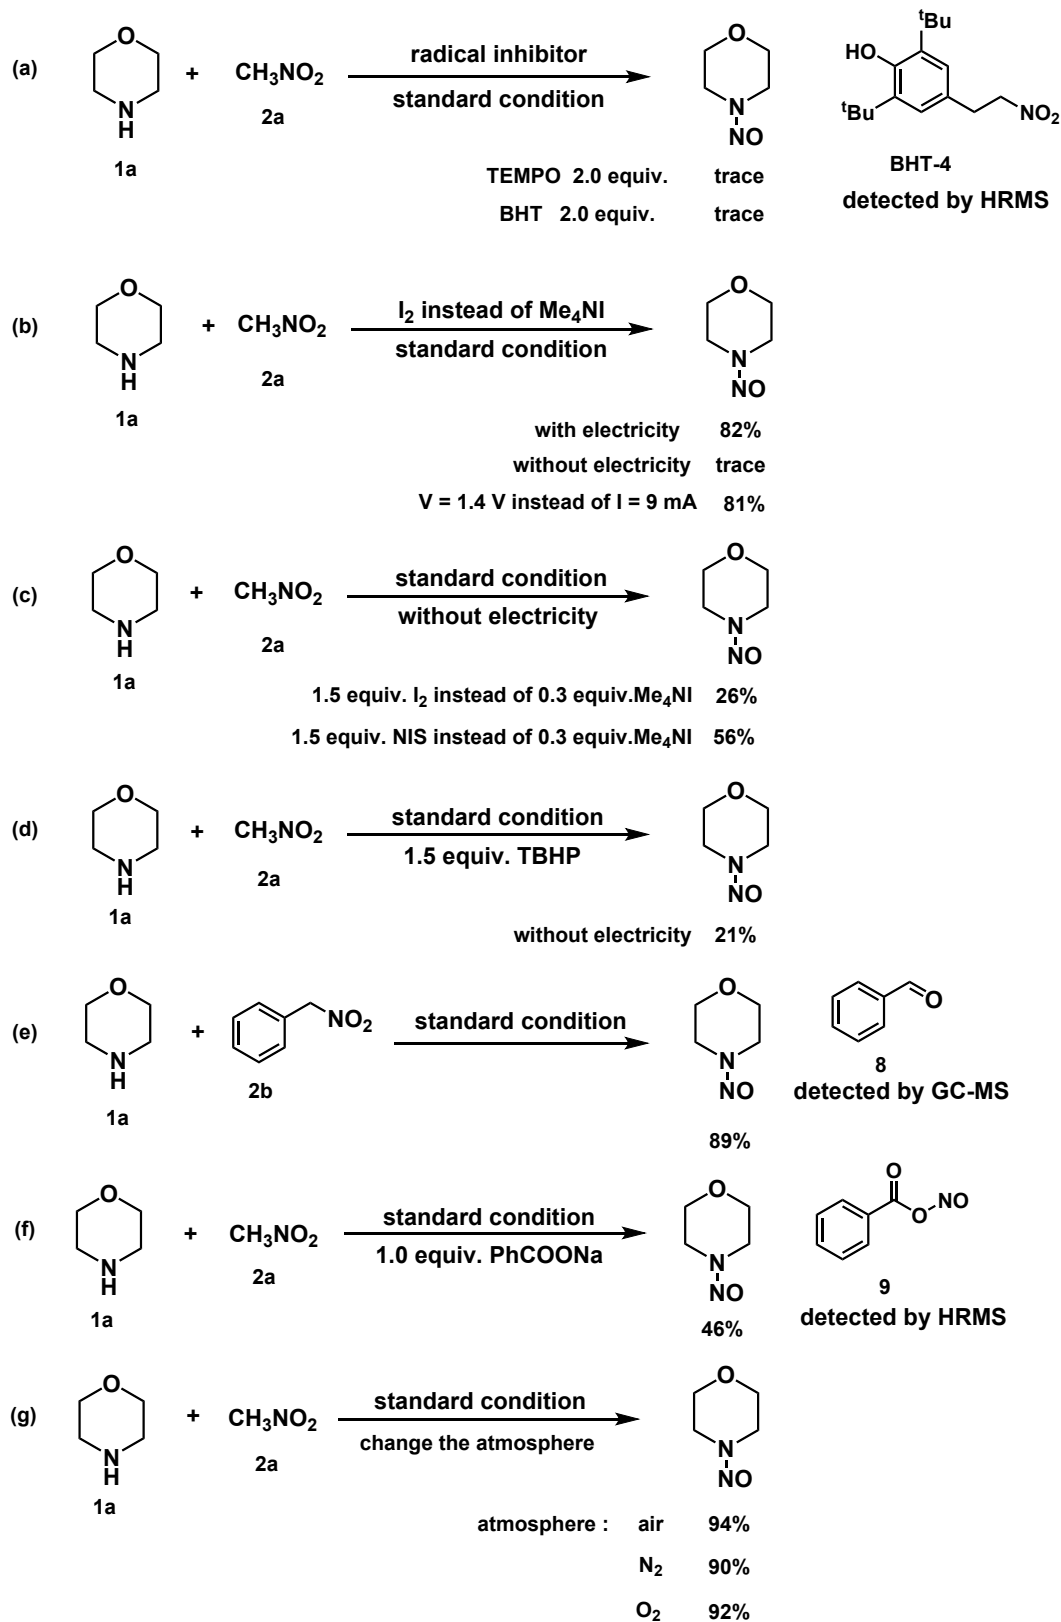

**Scheme S4a: for BHT-4:** A mixture of morpholine (0.3 mmol), nitromethane (0.45 mmol), Me<sub>4</sub>Ni (0.09 mmol) and DABCO (0.2 mmol), butylated hydroxytoluene (BHT, 0.6 mmol) and CH<sub>3</sub>CN = 6 mL were added to an undivided cell. The cell was equipped with a carbon electrode as anode and a nickel electrode as cathode. The reaction mixture was stirred and electrolyzed at a constant current of 9 mA under 50°C for corresponding time.

HRMS (ESI) m/z calcd for C<sub>16</sub>H<sub>25</sub>NO<sub>2</sub>[M+H]<sup>+</sup> 280.1907, found 280.1901.

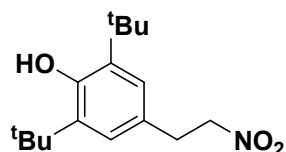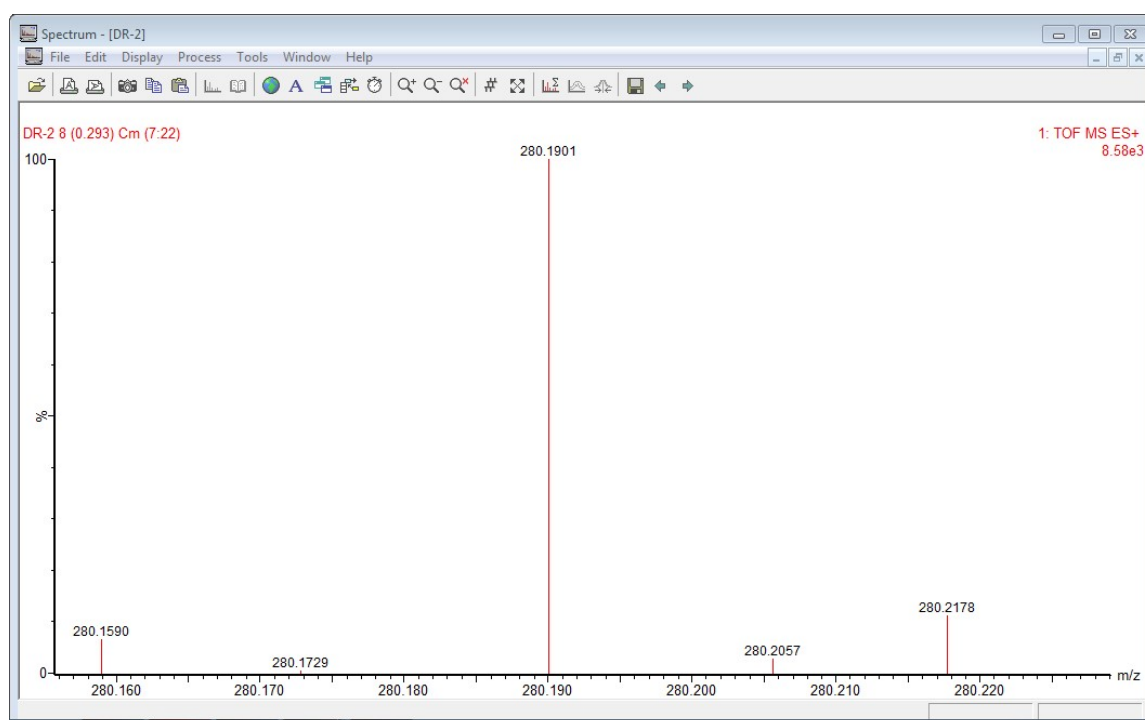

**Scheme S4e: for benzaldehyde (8):** A mixture of morpholine (0.3 mmol), (nitromethyl)benzene (0.45 mmol), Me<sub>4</sub>Ni (0.09 mmol), DABCO (0.2 mmol) and CH<sub>3</sub>CN = 6 mL were added to an undivided cell. The cell was equipped with a carbon electrode as anode and a nickel electrode as cathode. The reaction mixture was stirred and electrolyzed at a constant current of 9 mA under 50°C for corresponding time.

GC-MS: m/z calcd for C<sub>7</sub>H<sub>6</sub>O 106, found 106.

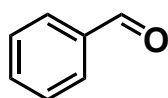

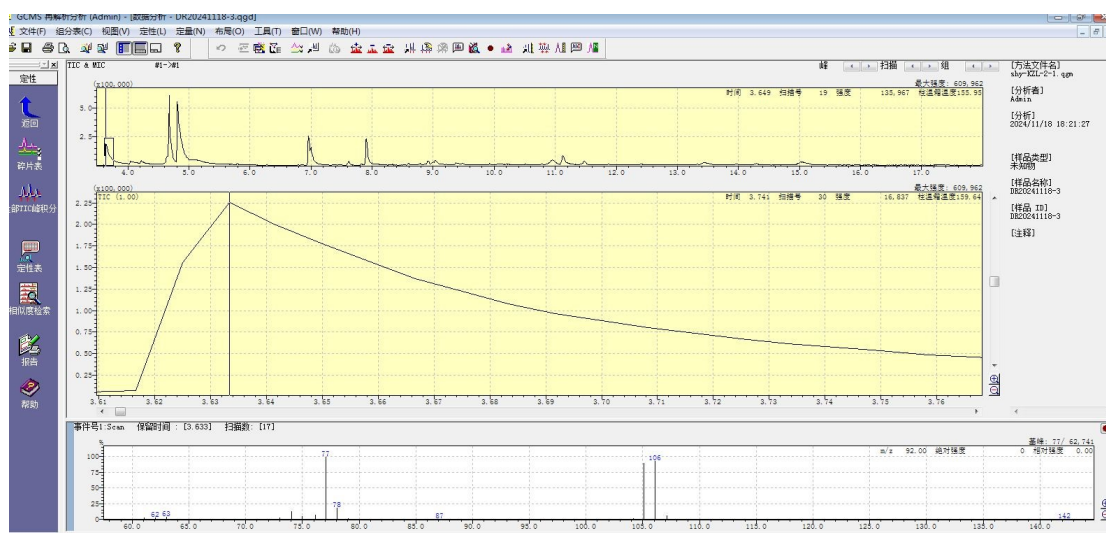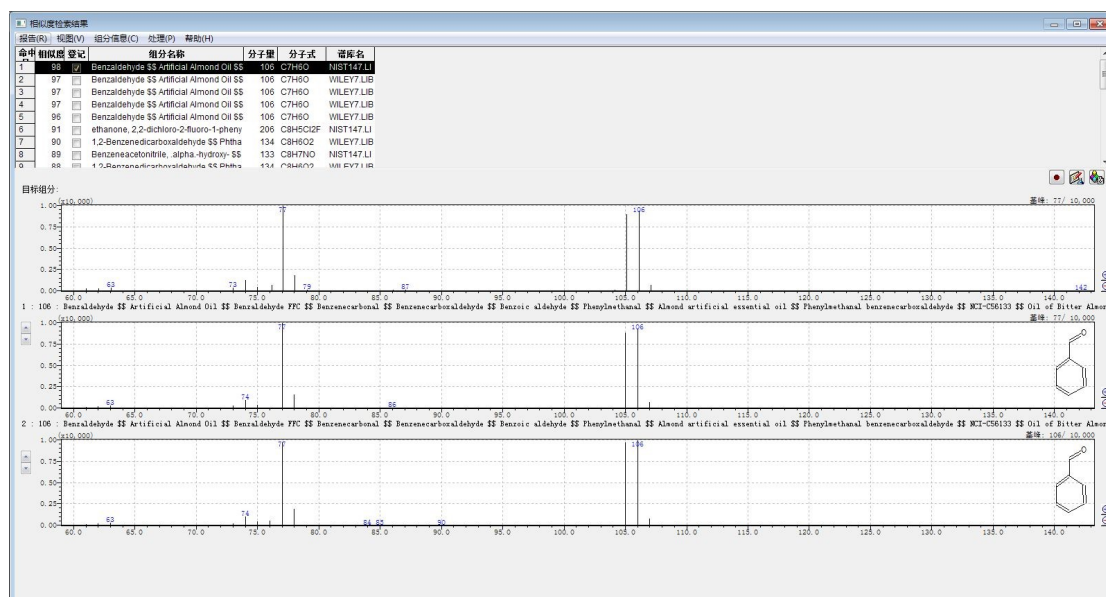

**Scheme S4f: for benzoic nitrous anhydride (9):** A mixture of morpholine (0.3 mmol), nitromethane (0.45 mmol), Me<sub>4</sub>Ni (0.09 mmol) and DABCO (0.2 mmol), sodium benzoate (PhCOONa, 0.3 mmol) and CH<sub>3</sub>CN = 6 mL were added to an undivided cell. The cell was equipped with a carbon electrode as anode and a nickel electrode as cathode. The reaction mixture was stirred and electrolyzed at a constant current of 9 mA under 50°C for corresponding time.

HRMS (ESI) m/z calcd for C<sub>7</sub>H<sub>6</sub>NO<sub>3</sub>[M+H]<sup>+</sup> 152.0342, found 152.0346.

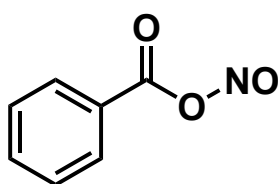

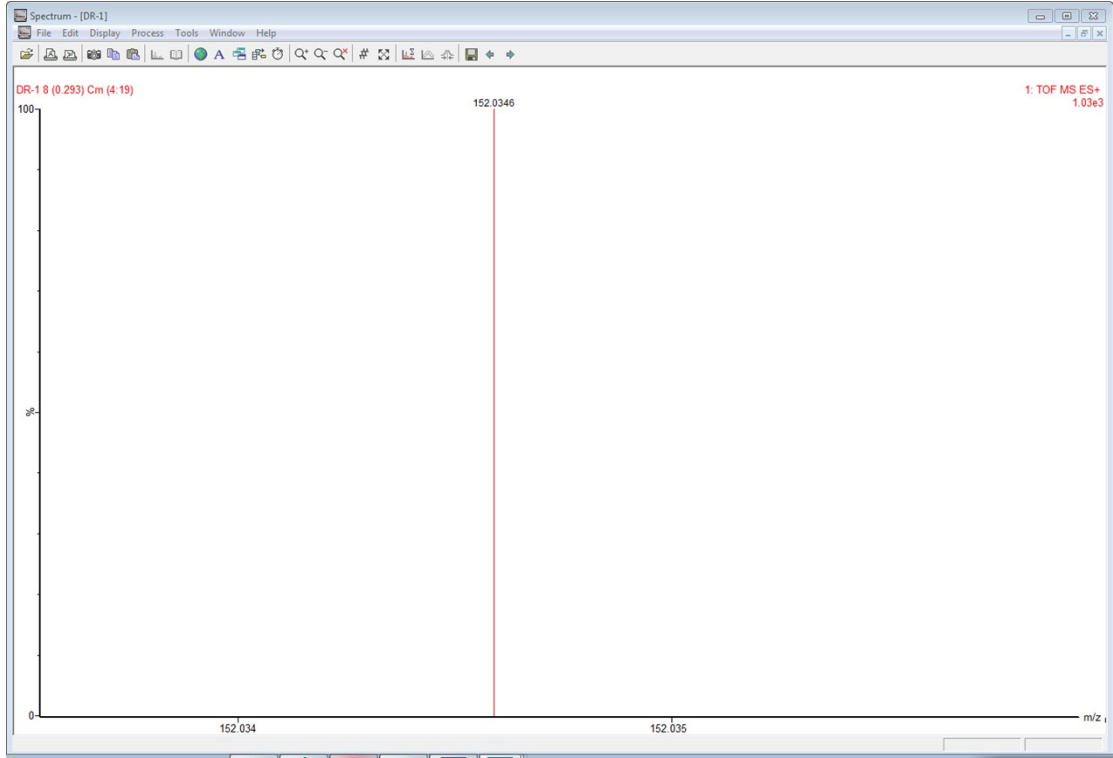

## 7、 Proposed possible reaction mechanism

**Scheme 5-5: iodo-(nitro)-methane (substance 5):** A mixture of morpholine (0.3 mmol), nitromethane (0.45 mmol), Me<sub>4</sub>NI (0.09 mmol) and DABCO (0.2 mmol) and CH<sub>3</sub>CN = 6 ml were added to an undivided cell. The cell was equipped with a carbon electrode as anode and a nickel electrode as cathode. The reaction mixture was stirred and electrolyzed at a constant current of 9 mA under 50°C for corresponding time.

HRMS (ESI) m/z calcd for CH<sub>3</sub>NO<sub>2</sub>[M+Na]<sup>+</sup> 209.9023, found 209.9047.

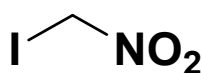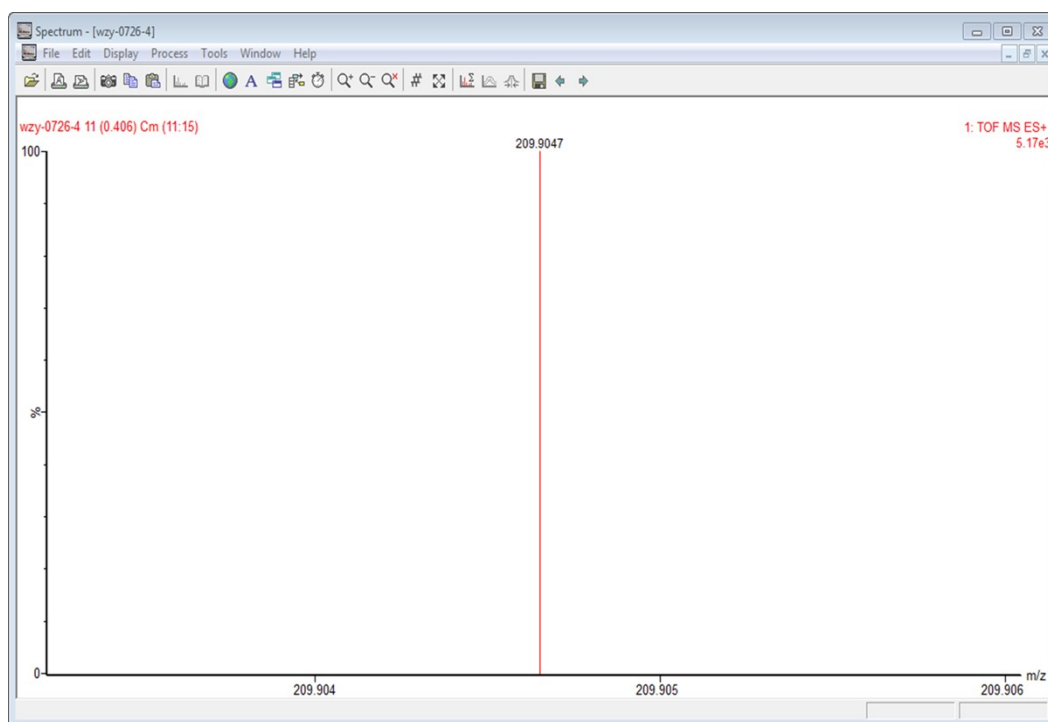



## 8、Detail Descriptions for Products

### 4-nitrosomorpholine(3a)<sup>[S1]</sup>

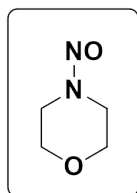

The title compound was prepared according to the general working procedure and purified by column chromatography (petroleum ether/ethyl acetate = 3:1) to give the product as a yellow oil. 94% yield, 32.7mg. <sup>1</sup>H NMR (500 MHz, Acetone-*d*<sub>6</sub>) δ 4.26 (m, 2H), 3.85 (m, 2H), 3.82 – 3.76 (m, 2H), 3.65 – 3.57 (m, 2H). <sup>13</sup>C NMR (125 MHz, Acetone-*d*<sub>6</sub>) δ 67.0, 65.5, 49.6, 40.0.

### 3-methyl-4-nitrosomorpholine(3b)<sup>[S3]</sup>

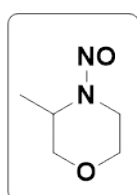

The title compound was prepared according to the general working procedure and purified by column chromatography (petroleum ether/ethyl acetate = 4:1) to give the product as a yellow oil. 92% yield, 35.9mg. <sup>1</sup>H NMR (500 MHz, Acetone-*d*<sub>6</sub>) δ 4.93 - 4.60 (m, 1H), 4.51 - 4.02 (m, 1H), 3.93 - 3.86 (dd, *J* = 11.5, 3.5 Hz, 1H), 3.76 – 3.43 (m, 4H), 1.50 (dd, *J* = 6.8, 0.9 Hz, 2H), 1.15 (d, *J* = 6.9 Hz, 1H). <sup>13</sup>C NMR (125 MHz, Acetone-*d*<sub>6</sub>) δ 72.6, 70.9, 67.9, 66.7, 56.2, 46.9, 45.4, 38.6, 16.0, 14.2.

### 2-methyl-4-nitrosomorpholine(3c)<sup>[S3]</sup>

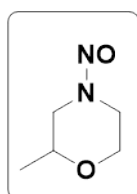

The title compound was prepared according to the general working procedure and purified by column chromatography (petroleum ether/ethyl acetate = 4:1) to give the product as a yellow oil. 94% yield, 36.7mg. <sup>1</sup>H NMR (500 MHz, Acetone-*d*<sub>6</sub>) δ 4.83 – 4.72 (m, 1H), 4.68 – 4.55 (m, 1H), 4.10 - 3.94 (ddd, *J* = 11.7, 4.3, 1.2 Hz, 1H), 3.85 (2.74) (m, 1H), 3.73 - 3.62 (m, 1H), 3.50 (2.42) (ddd, *J* = 13.3, 10.6, 1.2 Hz, 1H), 3.41 – 3.30 (m, 1H), 1.27 (d, *J* = 6.1 Hz, 2H), 1.18 (d, *J* = 6.2 Hz, 1H). <sup>13</sup>C NMR (125 MHz, Acetone-*d*<sub>6</sub>) δ 72.7, 71.3, 66.5, 65.0, 55.1, 48.9, 45.2, 39.2, 18.2, 17.8. <sup>1</sup>H NMR (600 MHz, Acetone-*d*<sub>6</sub>, -80°C) δ 4.87 (dd, *J* = 31.6, 13.6 Hz, 1H), 4.73 (4.63) (d, *J* = 13.0 Hz, 1H), 4.14 (3.99) (dd, *J* = 11.6, 3.8 Hz, 1H), 3.88 (2.77) (td, *J* = 12.6, 3.8 Hz, 1H), 3.78 – 3.66 (3.43 – 3.33) (m, 2H), 3.57 – 3.53 (2.56 – 2.39) (m, 1H), 1.28 (1.20) (d, *J* = 6.2 Hz, 3H).

### 3,3-dimethyl-4-nitrosomorpholine(3d)<sup>[S3]</sup>

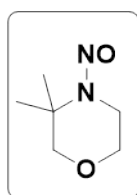

The title compound was prepared according to the general working procedure and purified by column chromatography (petroleum ether/ethyl acetate = 6:1) to give the product as a yellow oil. 84% yield, 36.3mg. <sup>1</sup>H NMR (500 MHz, Methanol-*d*<sub>4</sub>) δ 3.82 (dd, *J* = 6.0, 5.0 Hz, 2H), 3.74 – 3.69 (dd, *J* = 6.0, 5.0 Hz, 2H), 3.61 (s, 2H), 1.57 (s, 6H). <sup>13</sup>C NMR (125 MHz, Methanol-*d*<sub>4</sub>) δ 77.3, 67.3, 61.5, 38.3, 23.9.

### 4-nitrosothiomorpholin(3e)<sup>[S1]</sup>

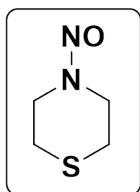

The title compound was prepared according to the general working procedure and purified by column chromatography (petroleum ether/ethyl acetate = 6:1) to give the product as a yellow oil. 93% yield, 36.8mg.  $^1\text{H}$  NMR (500 MHz, Chloroform-*d*)  $\delta$  4.56 – 4.47 (m, 2H), 4.13 – 4.00 (m, 2H), 2.95 – 2.82 (m, 2H), 2.63 – 2.55 (m, 2H).  $^{13}\text{C}$  NMR (125 MHz, Chloroform-*d*)  $\delta$  52.4, 41.3, 28.9, 27.3.

$^1\text{H}$  NMR (600 MHz, Chloroform-*d*,  $-60^\circ\text{C}$ )  $\delta$  4.66 – 4.45 (m, 2H), 4.15 (s, 2H), 3.12 – 2.86 (t,  $J = 5.4$  Hz, 2H), 2.66 (t,  $J = 5.4$  Hz, 2H).

### 1-nitrosopiperidine(3f)<sup>[S1]</sup>

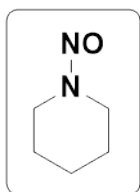

The title compound was prepared according to the general working procedure and purified by column chromatography (petroleum ether/ethyl acetate = 6:1) to give the product as a yellow oil. 90% yield, 30.1mg.  $^1\text{H}$  NMR (500 MHz, Chloroform-*d*)  $\delta$  4.22 – 4.14 (m, 2H), 3.81 – 3.74 (m, 2H), 1.84 – 1.71 (m, 4H), 1.56 (m, 2H).  $^{13}\text{C}$  NMR (125 MHz, Chloroform-*d*)  $\delta$  49.9, 38.8, 25.4, 23.7, 23.1.

### 4-methyl-1-nitrosopiperidine(3g)<sup>[S1]</sup>

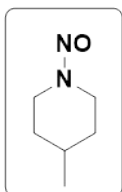

The title compound was prepared according to the general working procedure and purified by column chromatography (petroleum ether/ethyl acetate = 4:1) to give the product as a yellow oil. 88% yield, 33.8mg.  $^1\text{H}$  NMR (500 MHz, Chloroform-*d*)  $\delta$  4.99 (m, 1H), 4.72 (m, 1H), 3.67 (td,  $J = 12.9, 3.6$  Hz, 1H), 2.57 (td,  $J = 13.1, 3.9$  Hz, 1H), 2.00 – 1.59 (m, 3H), 1.36 (m, 1H), 1.10 – 0.97 (m, 1H), 1.01 (d,  $J = 6.6$  Hz, 3H).  $^{13}\text{C}$  NMR (125 MHz, Chloroform-*d*)  $\delta$  50.1, 39.0, 34.4, 32.7, 30.9, 21.3.

### 4-methoxy-1-nitrosopiperidine(3h)<sup>[S1]</sup>

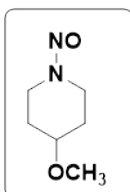

The title compound was prepared according to the general working procedure and purified by column chromatography (petroleum ether/ethyl acetate = 3:1) to give the product as a yellow oil. 96% yield, 41.5mg.  $^1\text{H}$  NMR (500 MHz, Methanol-*d*<sub>4</sub>)  $\delta$  4.31 (ddd,  $J = 12.9, 8.4, 4.3$  Hz, 1H), 4.17 (ddd,  $J = 13.3, 6.9, 4.5$  Hz, 1H), 3.91 – 3.77 (m, 2H), 3.64 (tt,  $J = 6.6, 3.2$  Hz, 1H), 3.39 (s, 3H), 2.06 – 1.98 (m, 1H), 1.86 (m, 1H), 1.76 (m, 1H), 1.62 (m, 1H).  $^{13}\text{C}$  NMR (125 MHz, Methanol-*d*<sub>4</sub>)  $\delta$  74.2, 54.9, 46.4, 35.5, 30.4, 28.7.

### 4-fluoro-1-nitrosopiperidine(3i)

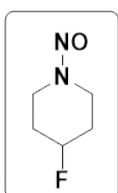

The title compound was prepared according to the general working procedure and purified by column chromatography (petroleum ether/ethyl acetate = 4:1) to give the product as a yellow oil. 90% yield, 35.6mg.  $^1\text{H}$  NMR (500 MHz, Chloroform-*d*)  $\delta$  5.06 (4.97) (tt,  $J = 5.2, 2.5$  Hz, 1H), 4.51 (m, 2H), 4.20 (ddd,  $J = 14.0, 10.8, 3.9$  Hz, 1H), 3.32 (ddd,  $J = 14.5,$

11.0, 4.2 Hz, 1H), 2.19 (m, 1H), 2.10 – 1.89 (m, 2H), 1.81 – 1.62 (m, 1H). <sup>13</sup>C NMR (125 MHz, Chloroform-*d*) δ 87.5, 86.1, 45.3, 45.2, 34.3, 34.3, 31.5, 31.4, 29.8, 29.7. <sup>19</sup>F NMR (470 MHz, Chloroform-*d*) δ -187.1.

HRMS (ESI) *m/z* calcd for C<sub>16</sub>H<sub>25</sub>NO<sub>2</sub>[M+Na]<sup>+</sup> 155.0591, found 155.0578.

#### 4-chloro-1-nitrosopiperidine(3j)<sup>[S1]</sup>

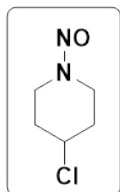

The title compound was prepared according to the general working procedure and purified by column chromatography (petroleum ether/ethyl acetate = 3:1) to give the product as a yellow oil. 92% yield, 40.8mg. <sup>1</sup>H NMR (500 MHz, Chloroform-*d*) δ 4.45 (tt, *J* = 6.1, 3.4 Hz, 1H), 4.39 (d, *J* = 4.7 Hz, 1H), 4.38 (d, *J* = 5.2 Hz, 1H) 4.23 (dt, *J* = 13.9, 5.1 Hz, 1H), 3.66 (ddd, *J* = 13.7, 9.1, 4.4 Hz, 1H), 2.25 (m, 1H), 2.13 (m, 1H), 2.01 – 1.85 (m, 2H). <sup>13</sup>C NMR (125 MHz, Chloroform-*d*) δ 55.5, 46.2, 35.2, 34.8, 33.3, 33.2.

#### 1-nitroso-4-(trifluoromethyl)piperidine(3k)<sup>[S3]</sup>

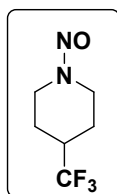

The title compound was prepared according to the general working procedure and purified by column chromatography (petroleum ether/ethyl acetate = 6:1) to give the product as a yellow oil. 95% yield, 51.9mg. <sup>1</sup>H NMR (500 MHz, Chloroform-*d*) δ 5.15 – 5.05 (m, 1H), 4.90 (d, *J* = 13.5 Hz, 1H), 3.72 (td, *J* = 13.1, 3.6 Hz, 1H), 2.59 (td, *J* = 13.3, 3.9 Hz, 1H), 2.44 (m, 1H), 2.19 (m, 1H), 2.03 – 1.96 (m, 1H), 1.77 (qd, *J* = 12.6, 4.8 Hz, 1H), 1.45 (qd, *J* = 12.7, 5.0 Hz, 1H). <sup>13</sup>C NMR (125 MHz, Chloroform-*d*) δ 125.6 (d, *J* = 278.5 Hz), 39.3 (q, *J* = 27.7 Hz), 36.2, 24.1 (q, *J* = 2.7 Hz), 22.5 (q, *J* = 2.8 Hz). <sup>19</sup>F NMR (470 MHz, Chloroform-*d*) δ -73.5.

#### 1-nitroso-4-phenylpiperidine(3l)<sup>[S3]</sup>

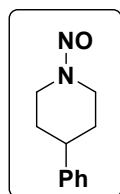

The title compound was prepared according to the general working procedure and purified by column chromatography (petroleum ether/ethyl acetate = 8:1) to give the product as a light yellow solid. 68% yield, 38.7mg. <sup>1</sup>H NMR (500 MHz, Acetone-*d*6) δ 7.35 – 7.19 (m, 5H), 5.11 (m, 1H), 4.83 (m, 1H), 3.92 – 3.81 (m, 1H), 3.03 (tt, *J* = 12.3, 3.4 Hz, 1H), 2.71 – 2.61 (m, 1H), 2.14 – 2.02 (m, 1H), 1.96 – 1.79 (m, 2H), 1.50 (m, 1H). <sup>13</sup>C NMR (125 MHz, Acetone-*d*6) δ 205.4, 145.1, 128.5, 126.8, 126.5, 49.8, 42.0, 38.5, 33.6, 32.0.

#### 8-nitroso-1,4-dioxo-8-azaspiro[4.5]decane(3m)<sup>[S3]</sup>

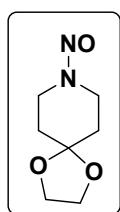

The title compound was prepared according to the general working procedure and purified by column chromatography (petroleum ether/ethyl acetate = 4:1) to give the product as a white solid. 97% yield, 50.1mg. <sup>1</sup>H NMR (500 MHz, Acetone-*d*6) δ 4.33 – 4.27 (m, 2H), 4.01 (t, *J* = 1.4 Hz, 4H), 3.84 – 3.78 (m, 2H), 1.91 (ddd, *J* = 7.1, 5.4, 1.2 Hz, 2H), 1.63 (ddd, *J* = 7.4, 5.6, 1.2 Hz, 2H). <sup>13</sup>C NMR (125 MHz, Acetone-*d*6) δ 106.6,

64.4, 47.2, 36.0, 35.0, 33.4.

### 2,2,6,6-tetramethyl-1-nitrosopiperidine(3n)<sup>[S1]</sup>

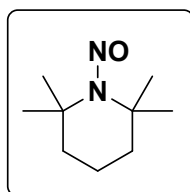

The title compound was prepared according to the general working procedure and purified by column chromatography (petroleum ether/ethyl acetate = 8:1) to give the product as a yellow oil. 60% yield, 28.9mg. <sup>1</sup>H NMR (500 MHz, Chloroform-*d*) δ 1.84 – 1.79 (m, 2H), 1.71 – 1.65 (m, 2H), 1.61 (s, 8H), 1.41 (s, 6H). <sup>13</sup>C NMR (125 MHz, Chloroform-*d*) δ 61.1, 59.7, 40.5, 37.8, 30.8, 25.0, 15.2.

### 1,4-dinitrosopiperazine(3o)<sup>[S1]</sup>

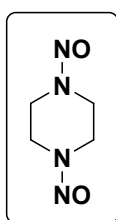

The title compound was prepared according to the general working procedure and purified by column chromatography (petroleum ether/ethyl acetate = 1:1) to give the product as a white solid. 60% yield, 25.9mg. <sup>1</sup>H NMR (500 MHz, Chloroform-*d*) δ 4.56 (d, *J* = 1.5 Hz, 2H), 4.42 – 4.39 (m, 2H), 4.05 (td, *J* = 5.8, 1.4 Hz, 2H), 3.82 (d, *J* = 1.5 Hz, 2H). <sup>13</sup>C NMR (125 MHz, Chloroform-*d*) δ 49.6, 47.1, 40.5, 37.8.

### 4-nitrosopiperazine-1-carbaldehyde(3p)<sup>[S3]</sup>

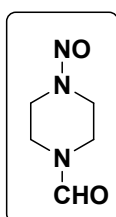

The title compound was prepared according to the general working procedure and purified by column chromatography (petroleum ether/ethyl acetate = 2:1) to give the product as a yellow oil. 84% yield, 36.0mg. <sup>1</sup>H NMR (500 MHz, Chloroform-*d*) δ 8.10 (d, *J* = 18.5 Hz, 1H), 4.30 – 4.27 (m, 1H), 4.24 (dd, *J* = 6.3, 4.6 Hz, 1H), 3.82 (dd, *J* = 6.4, 4.7 Hz, 1H), 3.76 (ddd, *J* = 15.9, 6.2, 4.7 Hz, 2H), 3.64 – 3.57 (m, 1H), 3.49 (dd, *J* = 6.5, 4.7 Hz, 1H), 3.36 (dd, *J* = 6.4, 4.6 Hz, 1H). <sup>13</sup>C NMR (125 MHz, Chloroform-*d*) δ 161.0, 160.9, 50.0, 48.8, 45.7, 44.0, 40.2, 39.9, 38.8, 38.6.

### tert-butyl 4-nitrosopiperazine-1-carboxylate(3q)<sup>[S4]</sup>

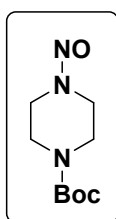

The title compound was prepared according to the general working procedure and purified by column chromatography (petroleum ether/ethyl acetate = 6:1) to give the product as a white solid. 77% yield, 49.7mg. <sup>1</sup>H NMR (400 MHz, Chloroform-*d*) δ 4.29 – 4.24 (m, 2H), 3.81 (t, *J* = 5.5 Hz, 2H), 3.68 (dd, *J* = 6.3, 4.5 Hz, 2H), 3.45 (t, *J* = 5.5 Hz, 2H), 1.49 (s, 9H). <sup>13</sup>C NMR (125 MHz, Chloroform-*d*) δ 154.3, 80.9, 49.3, 48.8, 46.1, 39.7, 28.3.

### 1-nitroso-4-phenylpiperazine(3r)<sup>[S4]</sup>

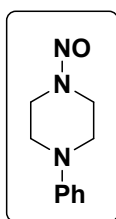

The title compound was prepared according to the general working procedure and purified by column chromatography (petroleum ether/ethyl acetate = 4:1) to give the product as a white solid. 73% yield, 41.8mg. <sup>1</sup>H NMR (500 MHz, Acetone-*d*6) δ 7.31 – 7.22 (m, 2H), 7.03 (d, *J* =

8.0 Hz, 2H), 6.87 (t,  $J = 7.3$  Hz, 1H), 4.43 – 4.37 (m, 2H), 3.97 – 3.86 (m, 2H), 3.49 – 3.43 (m, 2H), 3.25 – 3.18 (m, 2H).  $^{13}\text{C}$  NMR (125 MHz, Acetone- $d_6$ )  $\delta$  151.7, 120.0, 121.0, 117.6, 50.8, 49.8, 49.0, 40.0.

### 1-nitrosopyrrolidine(3s)<sup>[S4]</sup>

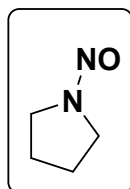

The title compound was prepared according to the general working procedure and purified by column chromatography (petroleum ether/ethyl acetate = 4:1) to give the product as a yellow oil. 82% yield, 24.6mg.  $^1\text{H}$  NMR (500 MHz, Chloroform- $d$ )  $\delta$  4.27 (t,  $J = 6.7$  Hz, 2H), 3.59 (t,  $J = 7.1$  Hz, 2H), 2.12 – 1.96 (m, 4H).  $^{13}\text{C}$  NMR (125 MHz, Chloroform- $d$ )  $\delta$  48.8, 44.2, 23.0, 21.6.

### 2-nitroso-1,2,3,4-tetrahydroisoquinoline(3t)<sup>[S4]</sup>

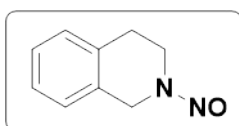

The title compound was prepared according to the general working procedure and purified by column chromatography (petroleum ether/ethyl acetate = 6:1) to give the product as a yellow oil. 84% yield, 40.8mg.  $^1\text{H}$  NMR (500 MHz, Chloroform- $d$ )  $\delta$  7.29 – 7.14 (m, 4H), 4.83(5.39) (s, 2H), 4.54(3.88) (t,  $J = 5.9$  Hz, 2H), 3.10 (2.96) (t,  $J = 5.9$  Hz, 2H).  $^{13}\text{C}$  NMR (125 MHz, Chloroform- $d$ )  $\delta$  135.0(133.9), 132.4, 130.0, 128.7, 128.1, 128.0, 127.3, 127.3, 127.2, 126.2, 51.3, 47.8, 44.5, 40.8, 29.8, 27.4.

### 2-nitrosoisoindoline(3u)<sup>[S2]</sup>

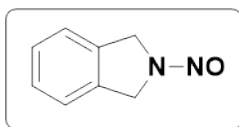

The title compound was prepared according to the general working procedure and purified by column chromatography (petroleum ether/ethyl acetate = 3:1) to give the product as a white grey solid. 45% yield, 20.0mg.  $^1\text{H}$  NMR (500 MHz, Chloroform- $d$ )  $\delta$  7.36 (m, 4H), 5.63 (s, 2H), 4.90 (s, 2H).  $^{13}\text{C}$  NMR (125 MHz, Chloroform- $d$ )  $\delta$  134.0, 133.2, 128.4, 128.1, 123.7, 123.1, 54.7, 51.4.

### *N,N*-dibutylnitrous amide(3v)<sup>[S4]</sup>

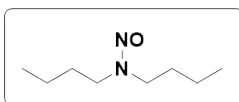

The title compound was prepared according to the general working procedure and purified by column chromatography (petroleum ether/ethyl acetate = 8:1) to give the product as a yellow oil. 71% yield, 33.7mg.  $^1\text{H}$  NMR (500 MHz, Chloroform- $d$ )  $\delta$  4.07 (t,  $J = 7.3$  Hz, 2H), 3.57 – 3.50 (m, 2H), 1.73 (tt,  $J = 7.6, 6.6$  Hz, 2H), 1.51 – 1.43 (m, 2H), 1.39 (m, 2H), 1.30 (m, 2H), 0.97 (t,  $J = 7.4$  Hz, 3H), 0.92 (t,  $J = 7.4$  Hz, 3H).  $^{13}\text{C}$  NMR (125 MHz, Chloroform- $d$ )  $\delta$  52.1, 43.5, 30.4, 28.2, 20.5, 19.8, 13.7, 13.6.

### *N*-butyl-*N*-methylnitrous amide (3w)<sup>[S4]</sup>

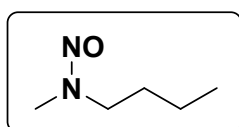

The title compound was prepared according to the general working procedure and purified by column chromatography

(petroleum ether/ethyl acetate = 6:1) to give the product as a yellow oil. 79% yield, 27.5mg.  $^1\text{H}$  NMR (500 MHz, Chloroform-*d*)  $\delta$  4.15(3.59) (t,  $J = 7.2$  Hz, 2H), 3.05(3.75) (s, 3H), 1.73(1.28) (p,  $J = 7.4$  Hz, 2H), 1.37(1.48) (h,  $J = 7.4$  Hz, 2H), 0.97 (0.92) (t,  $J = 7.4$  Hz, 3H).  $^{13}\text{C}$  NMR (125 MHz, Chloroform-*d*)  $\delta$  53.2, 44.5, 38.9, 31.1, 29.9, 27.6, 20.1, 19.5, 13.5, 13.4.

### ***N,N*-dicyclohexylnitrous amide(3x)<sup>[S4]</sup>**

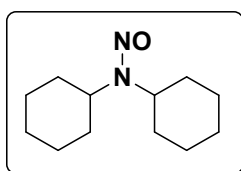

The title compound was prepared according to the general working procedure and purified by column chromatography (petroleum ether/ethyl acetate = 6:1) to give the product as a white solid. 73% yield, 46.0mg.  $^1\text{H}$  NMR (500 MHz, Chloroform-*d*)  $\delta$  4.87 (tt,  $J = 12.0, 3.8$  Hz, 1H), 3.72 (tt,  $J = 11.3, 4.4$  Hz, 1H), 1.99 – 1.85 (m, 6H), 1.80 (d,  $J = 13.1$  Hz, 2H), 1.75 – 1.65 (m, 2H), 1.59 (dd,  $J = 12.0, 3.6$  Hz, 2H), 1.39 (m, 6H), 1.26 (m, 1H), 1.15 (m, 1H).  $^{13}\text{C}$  NMR (125 MHz, Chloroform-*d*)  $\delta$  58.6, 52.2, 34.4, 29.4, 26.1, 25.5, 25.4, 25.2.

### ***N*-benzyl-*N*-methylnitrous amide(3y)<sup>[S1]</sup>**

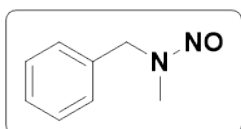

The title compound was prepared according to the general working procedure and purified by column chromatography (petroleum ether/ethyl acetate = 6:1) to give the product as a yellow oil. 76% yield, 34.2mg.  $^1\text{H}$  NMR (500 MHz, Chloroform-*d*)  $\delta$  7.42 – 7.23 (7.18 – 7.10) (m, 5H), 5.30 (4.80) (s, 2H), 3.69 (2.94) (s, 3H).  $^{13}\text{C}$  NMR (125 MHz, Chloroform-*d*)  $\delta$  134.5, 133.8, 129.1, 128.9, 128.6, 128.4, 128.1, 128.0, 57.6, 47.8, 38.4, 30.9.

### ***N*-methyl-*N*-phenethylnitrous amide(3z)<sup>[S5]</sup>**

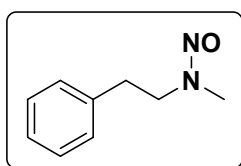

The title compound was prepared according to the general working procedure and purified by column chromatography (petroleum ether/ethyl acetate = 6:1) to give the product as a yellow oil. 72% yield, 35.4mg.  $^1\text{H}$  NMR (500 MHz, Chloroform-*d*)  $\delta$  7.39 – 7.10 (m, 5H), 4.37 (3.78)(t,  $J = 7.2$  Hz, 2H), 3.04 (2.80) (t,  $J = 7.2$  Hz, 2H), 2.98 (3.56) (s, 3H).  $^{13}\text{C}$  NMR (125 MHz, Chloroform-*d*)  $\delta$  138.0, 137.3, 128.8, 128.7, 128.7, 127.0, 126.8, 55.1, 47.1, 39.8, 35.1, 32.0, 31.8.

### **8-chloro-11-(1-nitrosopiperidin-4-ylidene)-6,11-dihydro-5H-**

### **benzo[5,6]cyclohepta[1,2-b]pyridine(3ab)<sup>[S2]</sup>**

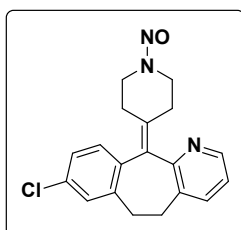

The title compound was prepared according to the general working procedure and purified by column chromatography (petroleum ether/ethyl acetate = 2:1) to give the product as an orange solid. 78% yield, 79.3mg.  $^1\text{H}$  NMR (500 MHz, Chloroform-*d*)  $\delta$  8.41 (ddd,  $J = 9.8, 4.9, 1.7$  Hz, 1H), 7.47 (td,  $J =$

7.6, 1.7 Hz, 1H), 7.22 – 7.07 (m, 4H), 4.53 – 4.38 (m, 1H), 4.21 – 4.02 (m, 2H), 3.59 – 3.47 (m, 1H), 3.44 – 3.27 (m, 2H), 2.93 – 2.76 (m, 2H), 2.71 – 2.33 (m, 4H). <sup>13</sup>C NMR (125 MHz, Chloroform-*d*) δ 156.4, 156.1, 146.7 (d, *J* = 3.5 Hz), 139.6, 138.0 (d, *J* = 6.8 Hz), 137.5, 137.3, 136.2, 136.1, 135.1, 135.0, 133.4 (d, *J* = 2.8 Hz), 133.3, 130.1 (d, *J* = 12.8 Hz), 129.1 (d, *J* = 5.3 Hz), 126.4 (d, *J* = 4.6 Hz), 122.6, 49.9 (d, *J* = 18.6 Hz), 40.3 (d, *J* = 11.7 Hz), 31.6 – 31.4 (m), 31.0, 30.7, 28.8, 28.6.

HRMS (ESI) *m/z* calcd for C<sub>19</sub>H<sub>18</sub>N<sub>3</sub>OCl[M+Na]<sup>+</sup> 340.1211, found 340.1216.

## 9、 Supporting Reference

[S1] R. Ali, R. Babaahmadi, M. Didsbury, R. Stephens, R. L. Melen and T. Wirth, *Chem. Eur. J.* 2023, **29**, e202300957.

[S2] Y. Wang, S. You, M. Ruan, F. Wang, C. Ma, C. Lu, G. Yang, Z. Chen, M. Gao, *Eur. J. Org. Chem.* 2021, **22**, 3289–3293.

[S3] J. P. Zhao, L. J. Ding, P. C. Wang, Y. Liu, M. J. Huang, X. L. Zhou and M. Lu, *Adv. Synth. Catal.* 2020, **362**, 5036– 5043.

[S4] J. Zhang, J. W. Jiang, Y. L. Li and X. B. Wan, *J. Org. Chem.* 2013, **78**, 11366–11372.

[S5] Y. P. Yu, J. M. Ostresh and R. A. Houghten, *J. Org. Chem.* 2003, **68**, 183-186.

# 10、Copies of Product NMR Spectra

## 4-nitrosomorpholine(3a)

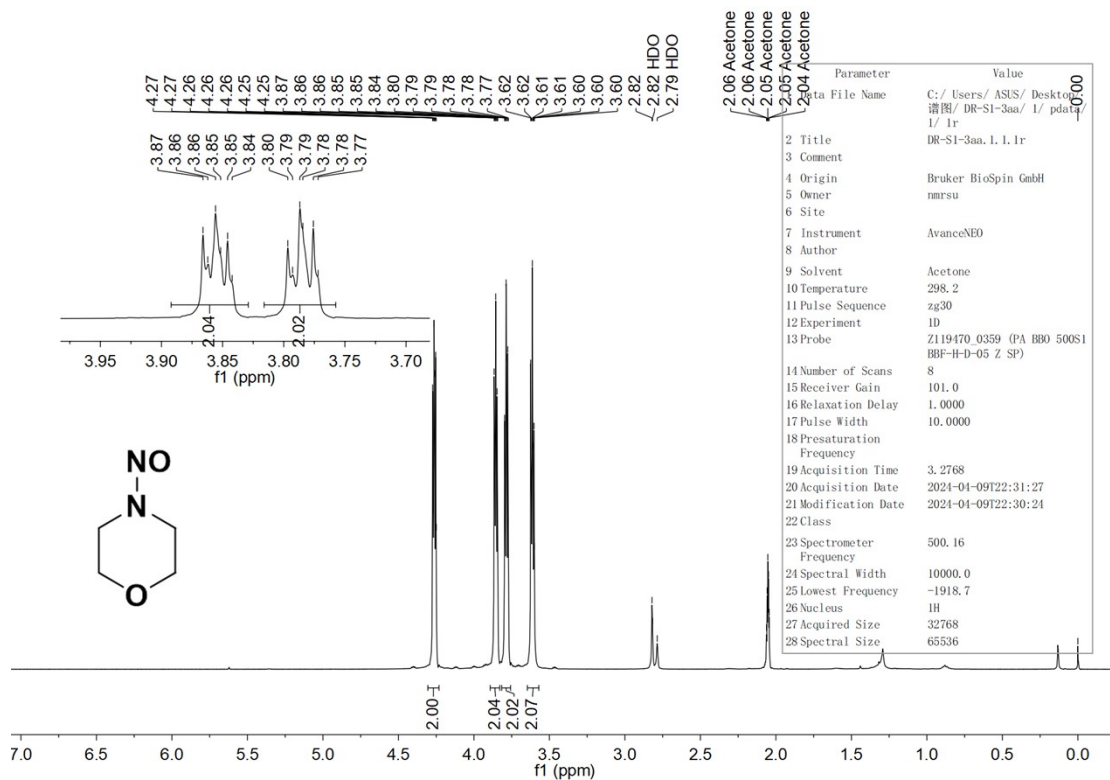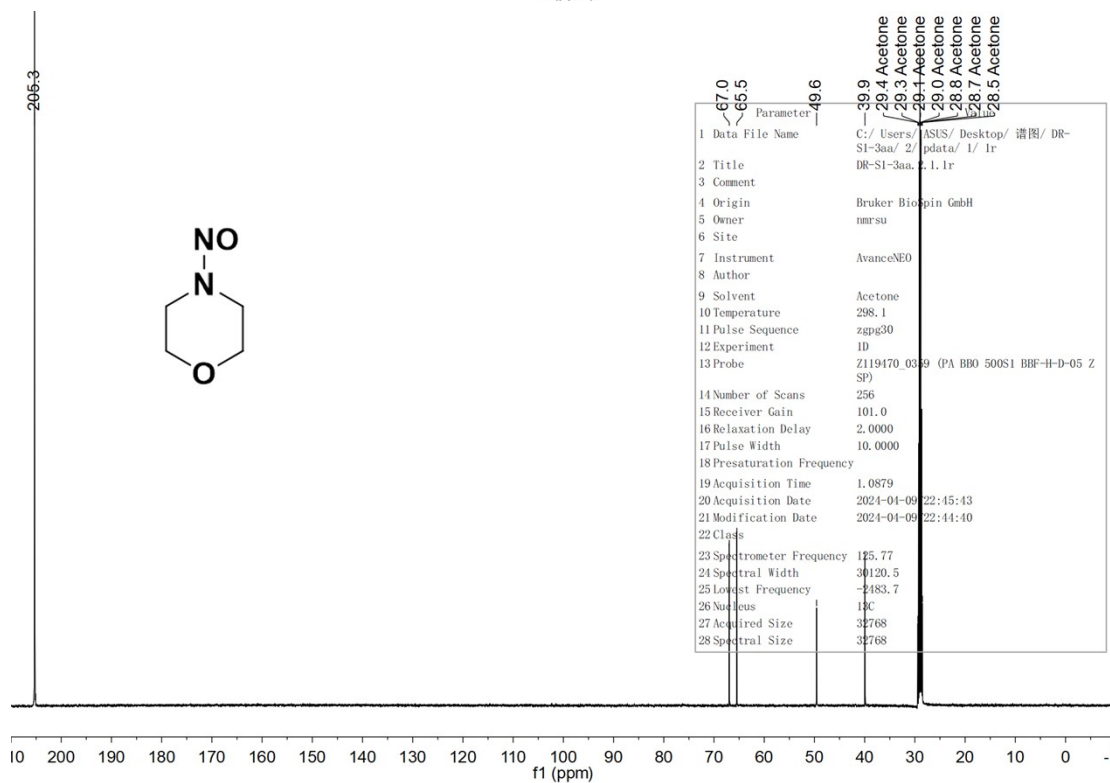



### 3-methyl-4-nitrosomorpholine(3b)

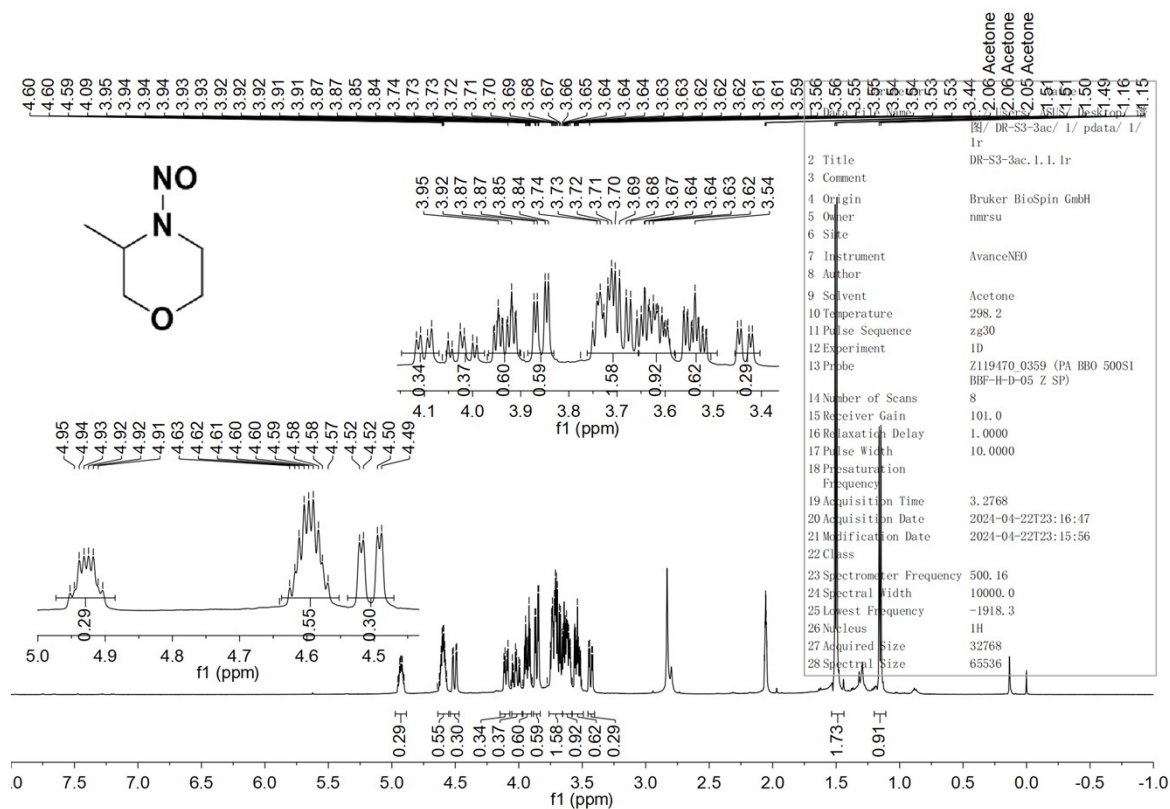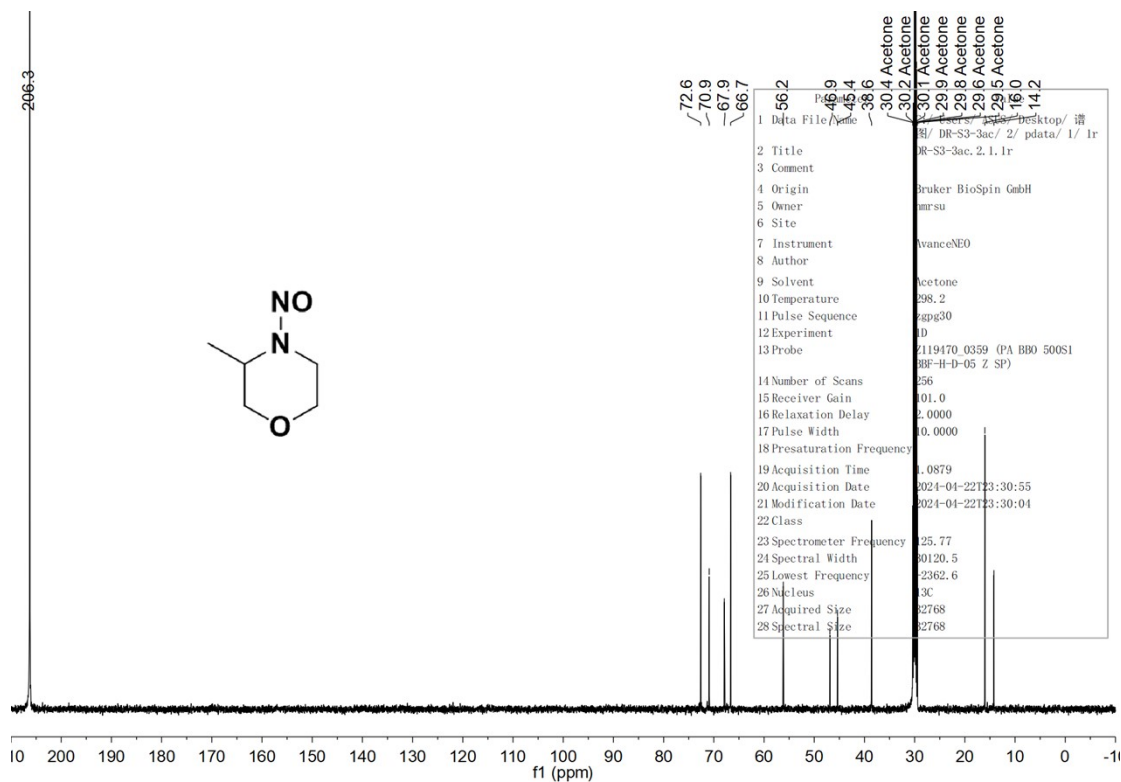

## 2-methyl-4-nitrosomorpholine(3c)

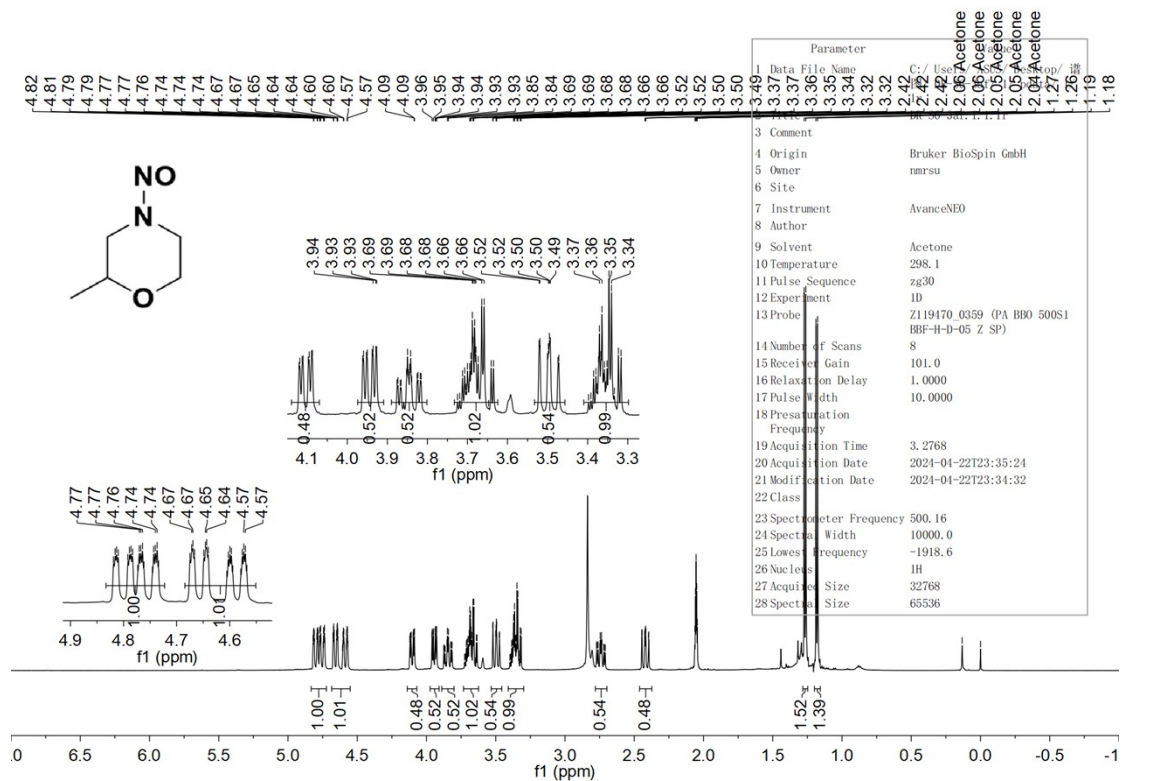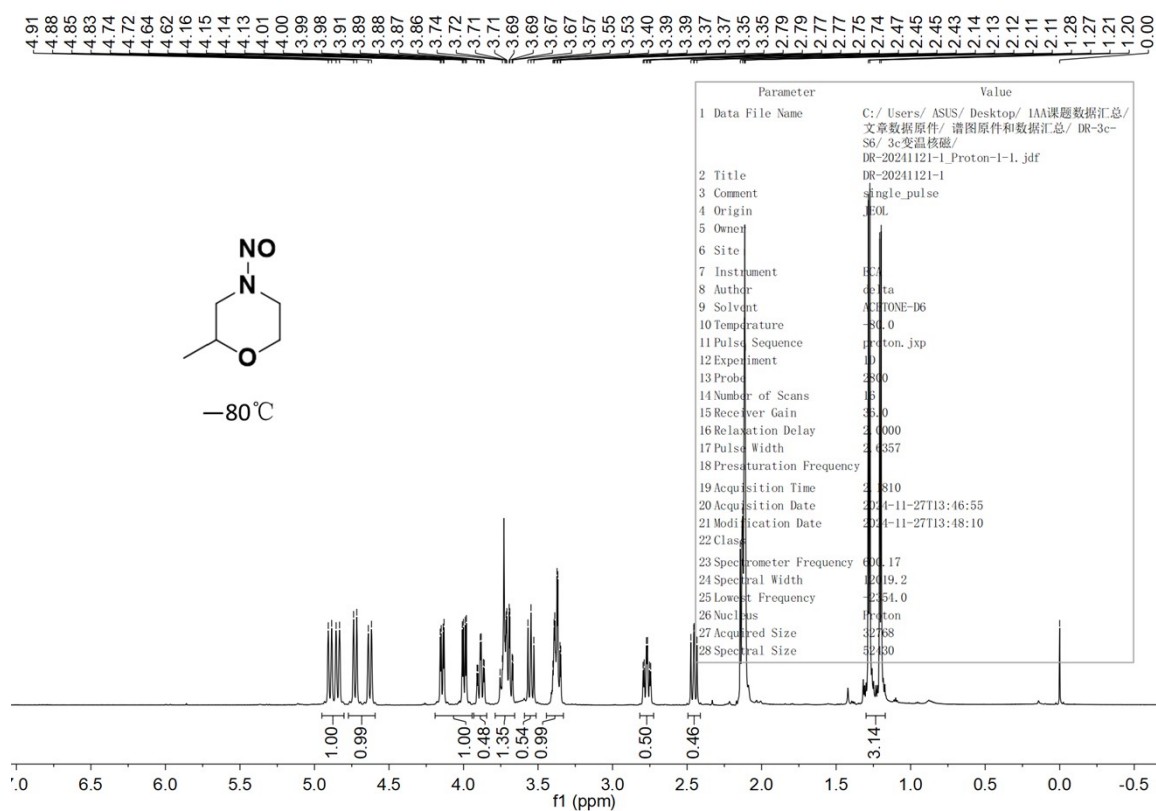

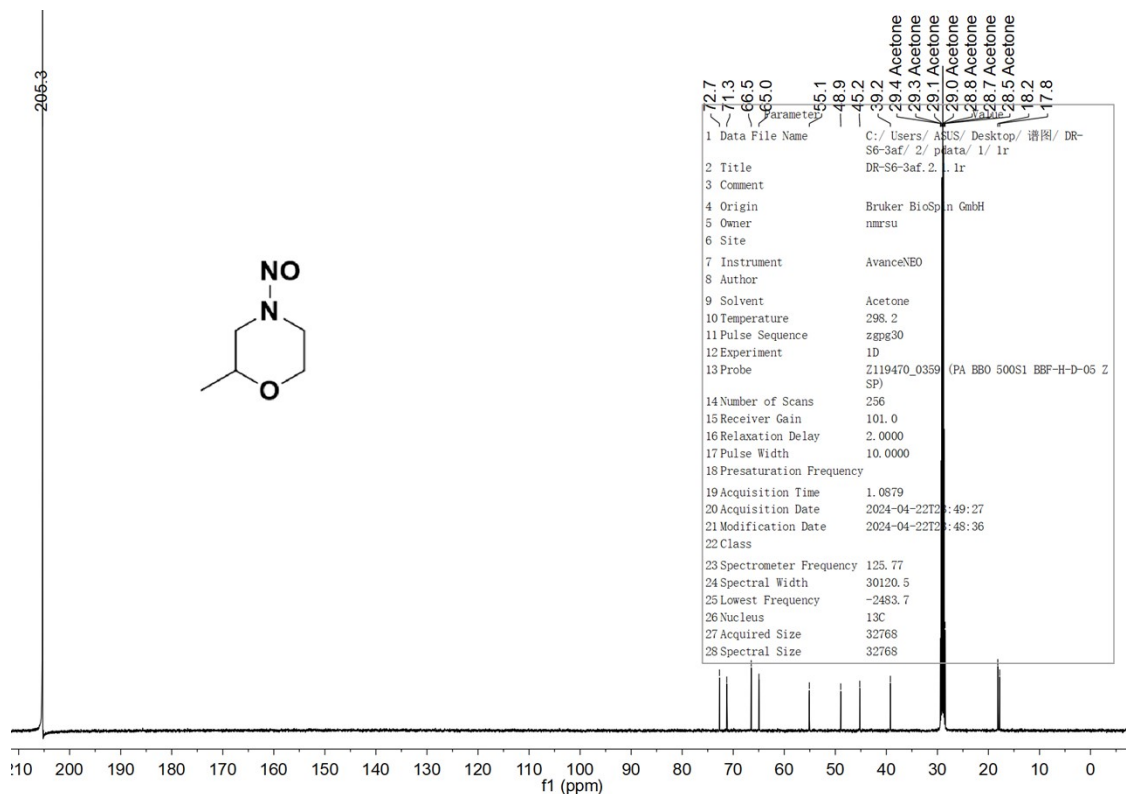

3,3-dimethyl-4-nitrosomorpholine(3d)

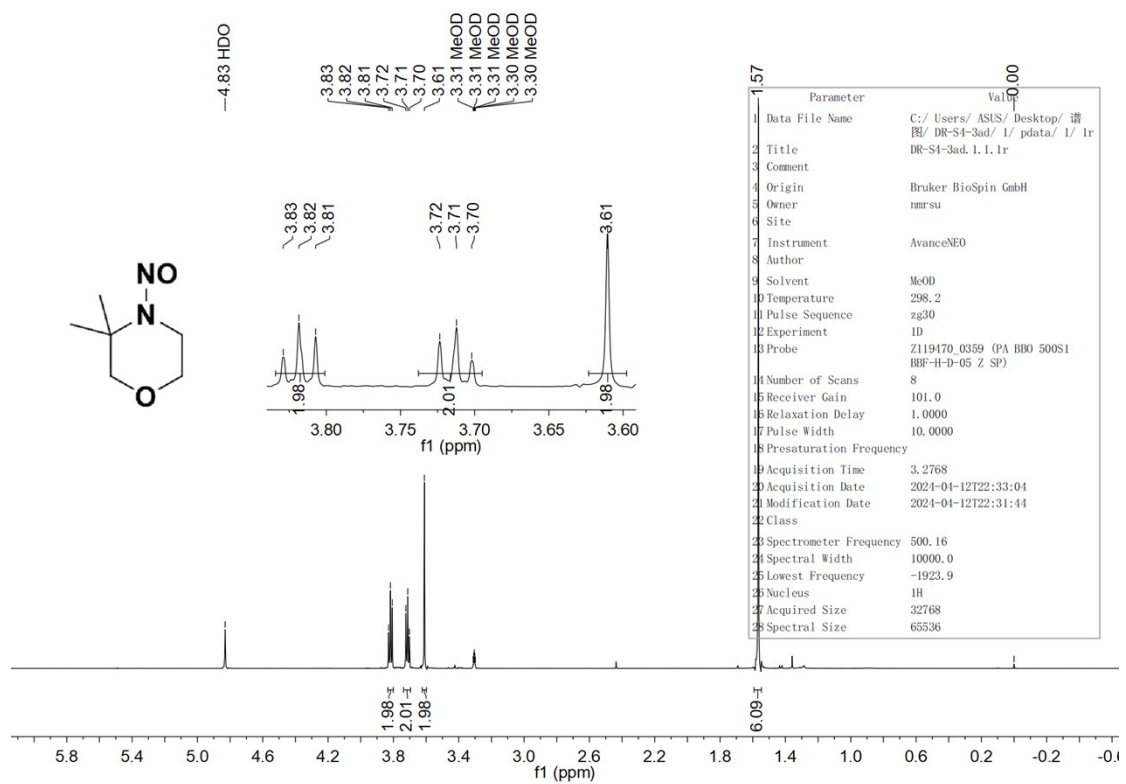

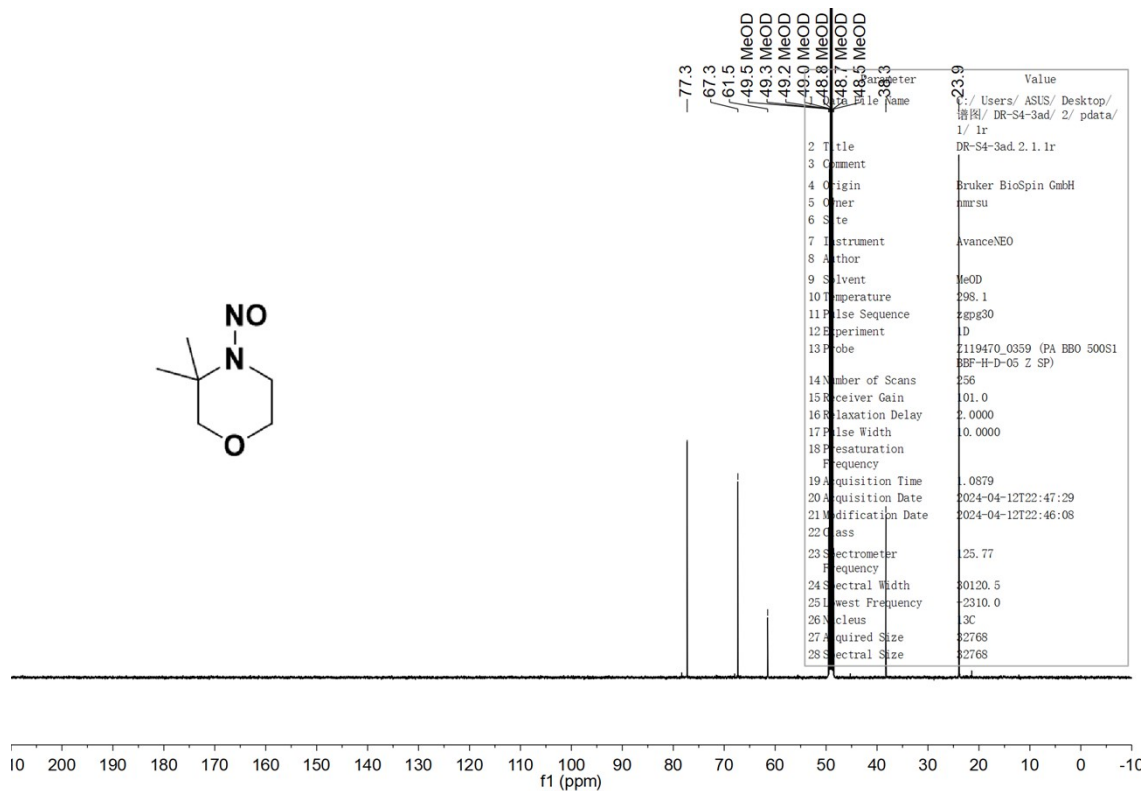

### 4-nitrosothiophorolin (3e)

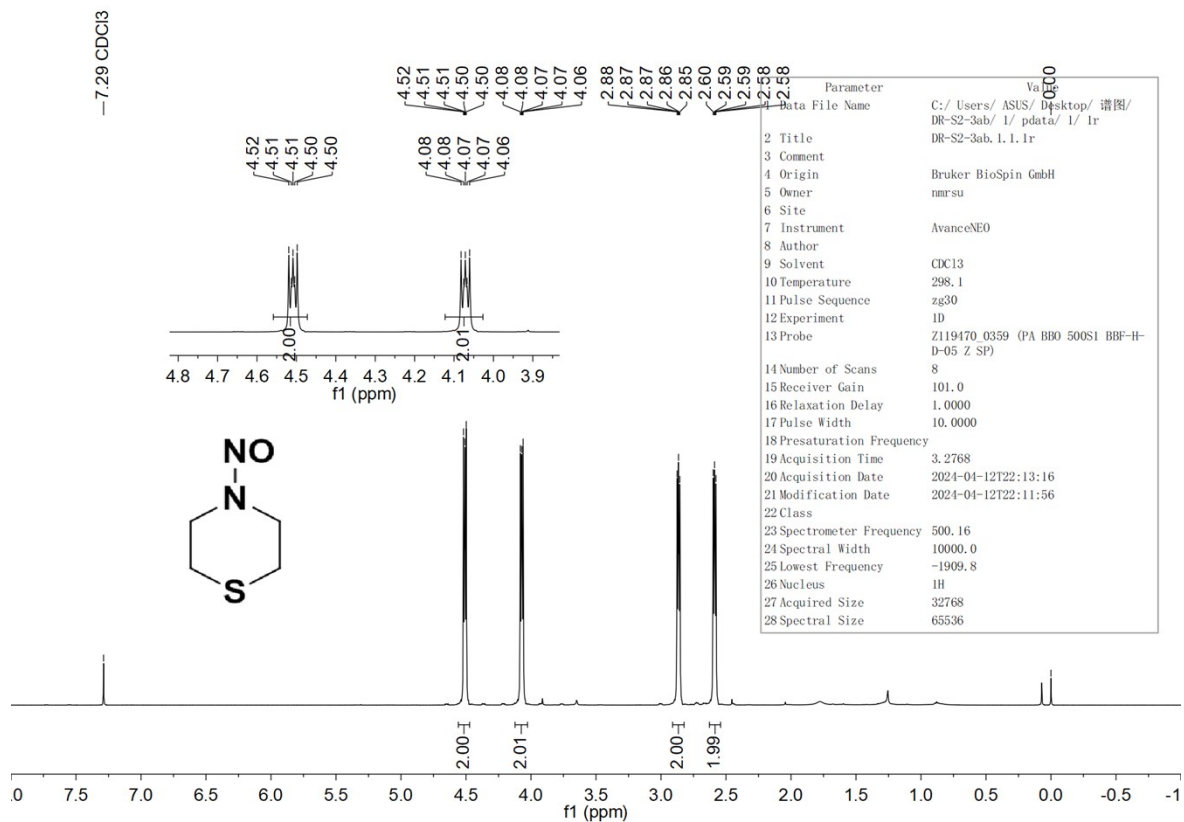

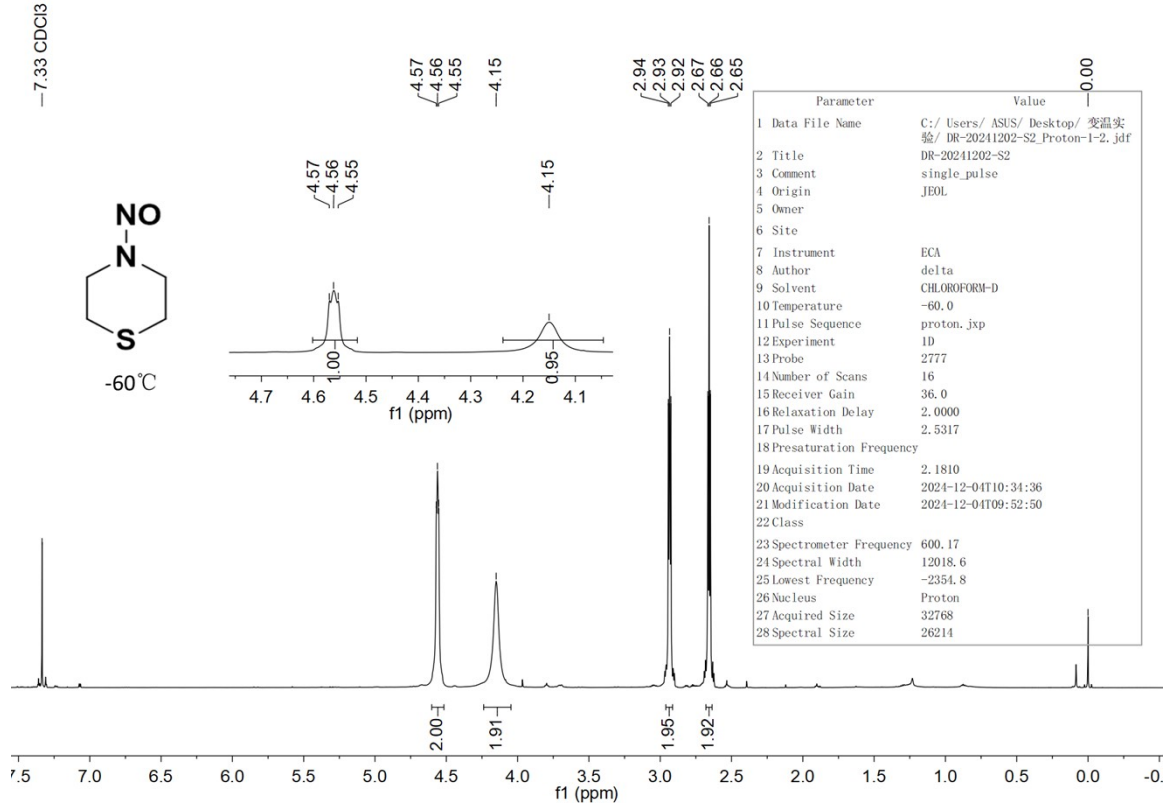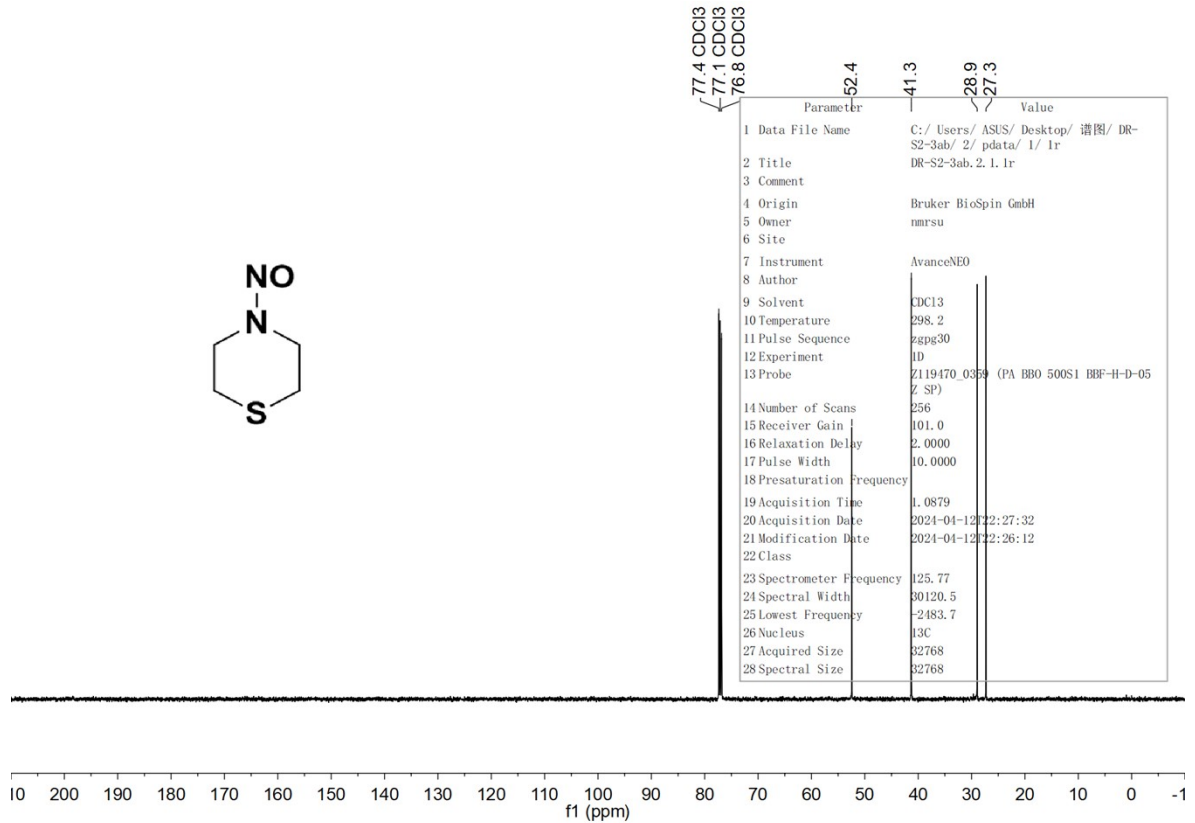



# 4-methyl-1-nitrosopiperidine(3g)

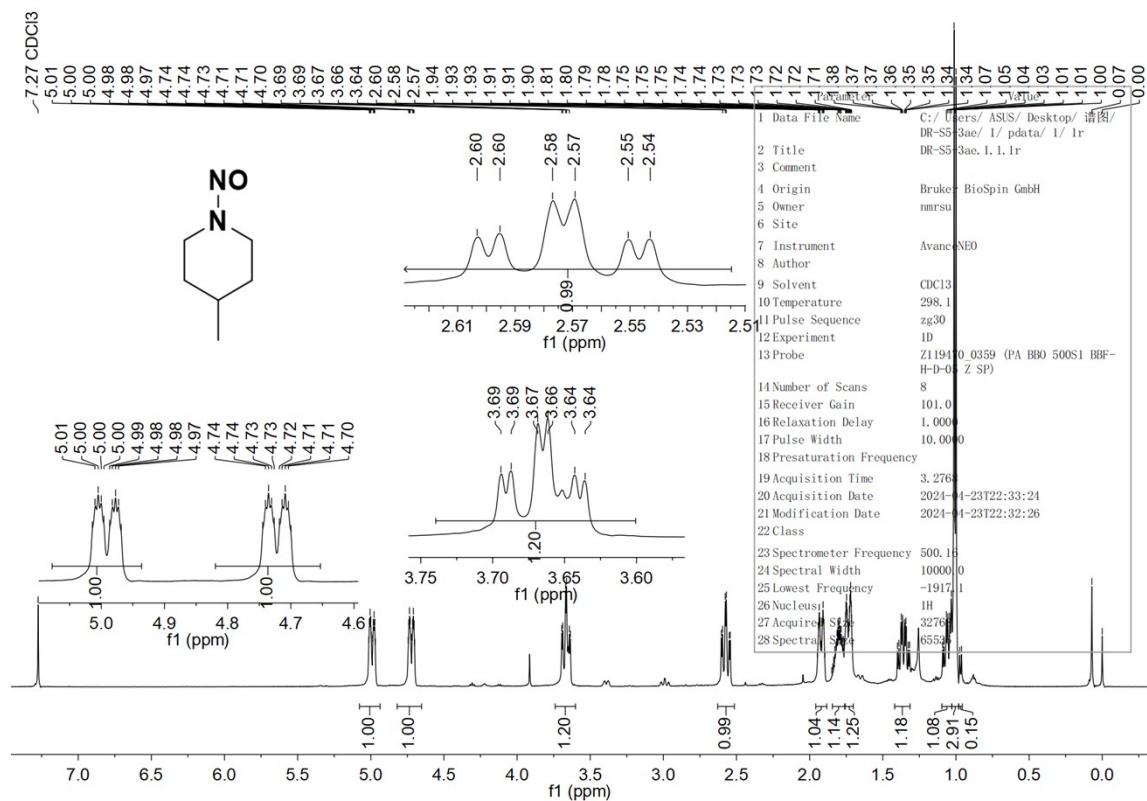

|    |                         |                                                 |
|----|-------------------------|-------------------------------------------------|
| 1  | Data File Name          | C:/Users/ASUS/Desktop/谱图/DR-S5-3ae/1/pdata/1/1r |
| 2  | Title                   | DR-S5-3ae.1.1.r                                 |
| 3  | Comment                 |                                                 |
| 4  | Origin                  | Bruker BioSpin GmbH                             |
| 5  | Owner                   | nmrsu                                           |
| 6  | Site                    |                                                 |
| 7  | Instrument              | Avance NEO                                      |
| 8  | Author                  |                                                 |
| 9  | Solvent                 | CDCl3                                           |
| 10 | Temperature             | 298.1                                           |
| 11 | Pulse Sequence          | zg30                                            |
| 12 | Experiment              | ID                                              |
| 13 | Probe                   | Z11940_0359 (PA BBO 500S1 BBF-H-D-05 Z SP)      |
| 14 | Number of Scans         | 8                                               |
| 15 | Receiver Gain           | 101.0                                           |
| 16 | Relaxation Delay        | 1.0000                                          |
| 17 | Pulse Width             | 10.0000                                         |
| 18 | Presaturation Frequency |                                                 |
| 19 | Acquisition Time        | 3.276                                           |
| 20 | Acquisition Date        | 2024-04-23T22:33:24                             |
| 21 | Modification Date       | 2024-04-23T22:32:26                             |
| 22 | Class                   |                                                 |
| 23 | Spectrometer Frequency  | 500.13                                          |
| 24 | Spectral Width          | 10000.0                                         |
| 25 | Lowest Frequency        | -1917.1                                         |
| 26 | Nucleus1                | 1H                                              |
| 27 | Acquired Size           | 32768                                           |
| 28 | Spectral Size           | 6553                                            |

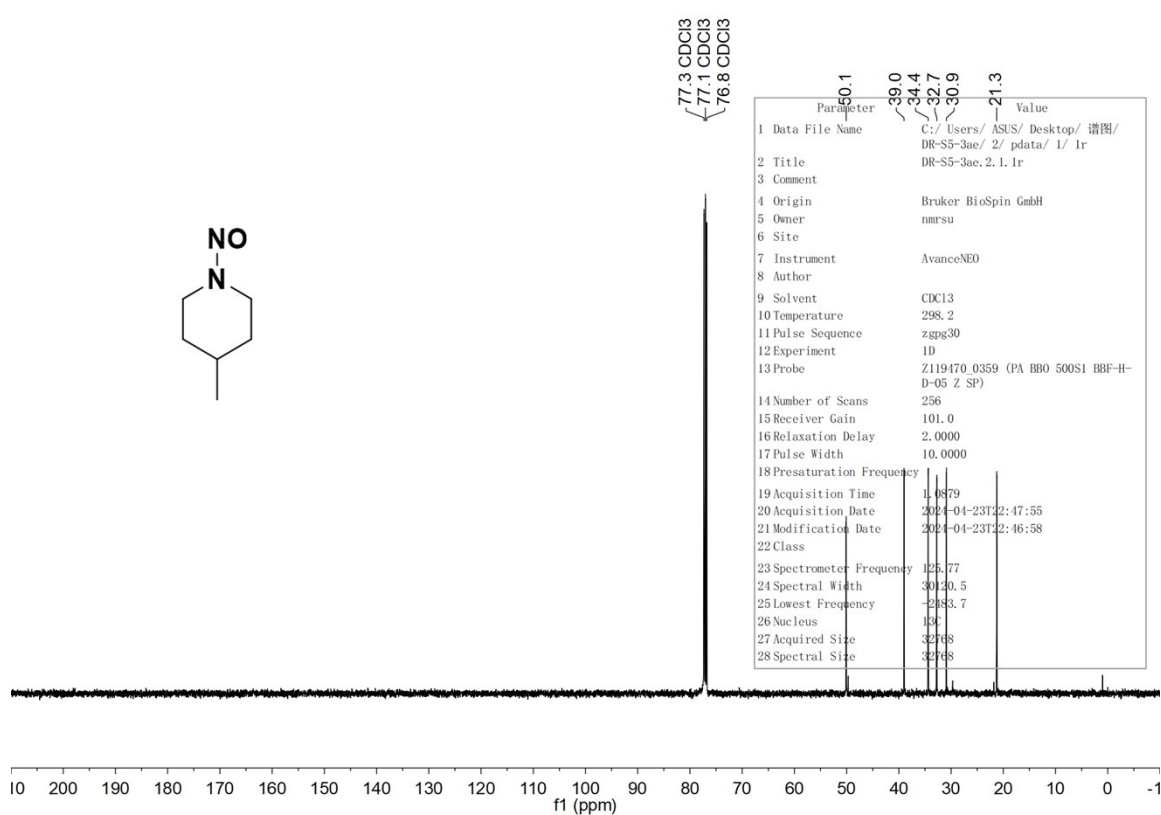

| Parameter | Value                   |                                                 |
|-----------|-------------------------|-------------------------------------------------|
| 1         | Data File Name          | C:/Users/ASUS/Desktop/谱图/DR-S5-3ae/2/pdata/1/1r |
| 2         | Title                   | DR-S5-3ae.2.1.r                                 |
| 3         | Comment                 |                                                 |
| 4         | Origin                  | Bruker BioSpin GmbH                             |
| 5         | Owner                   | nmrsu                                           |
| 6         | Site                    |                                                 |
| 7         | Instrument              | Avance NEO                                      |
| 8         | Author                  |                                                 |
| 9         | Solvent                 | CDCl3                                           |
| 10        | Temperature             | 298.2                                           |
| 11        | Pulse Sequence          | zgpg30                                          |
| 12        | Experiment              | ID                                              |
| 13        | Probe                   | Z119470_0359 (PA BBO 500S1 BBF-H-D-05 Z SP)     |
| 14        | Number of Scans         | 256                                             |
| 15        | Receiver Gain           | 101.0                                           |
| 16        | Relaxation Delay        | 2.0000                                          |
| 17        | Pulse Width             | 10.0000                                         |
| 18        | Presaturation Frequency |                                                 |
| 19        | Acquisition Time        | 1.0879                                          |
| 20        | Acquisition Date        | 2024-04-23T22:47:55                             |
| 21        | Modification Date       | 2024-04-23T22:46:58                             |
| 22        | Class                   |                                                 |
| 23        | Spectrometer Frequency  | 125.77                                          |
| 24        | Spectral Width          | 3020.5                                          |
| 25        | Lowest Frequency        | -2483.7                                         |
| 26        | Nucleus                 | 13C                                             |
| 27        | Acquired Size           | 32768                                           |
| 28        | Spectral Size           | 32768                                           |

# 4-methoxy-1-nitrosopiperidine(3h)

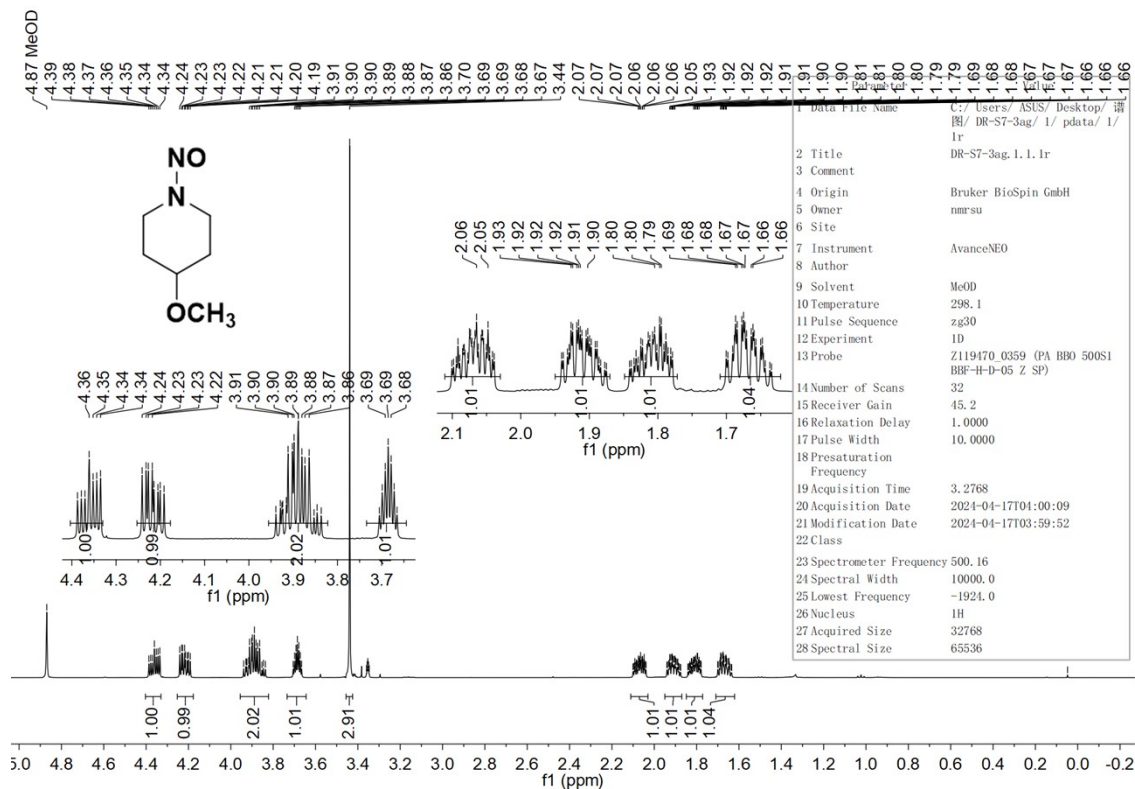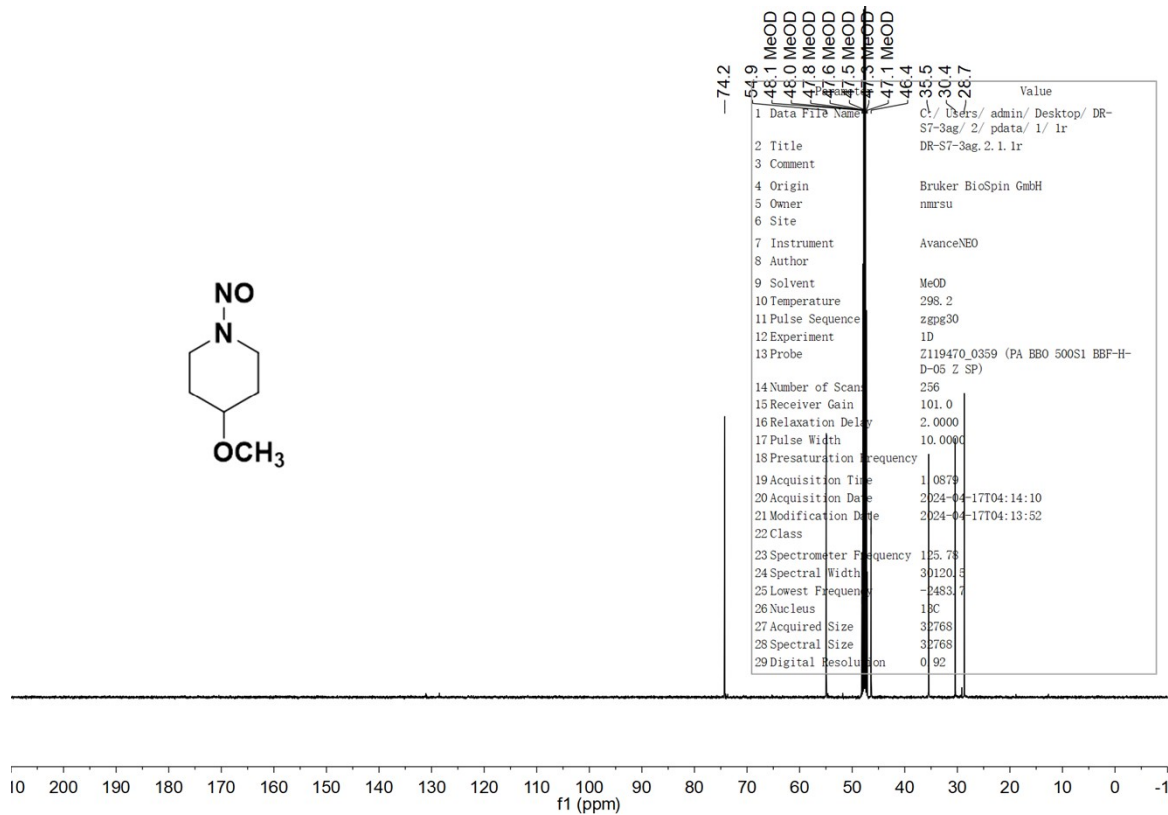





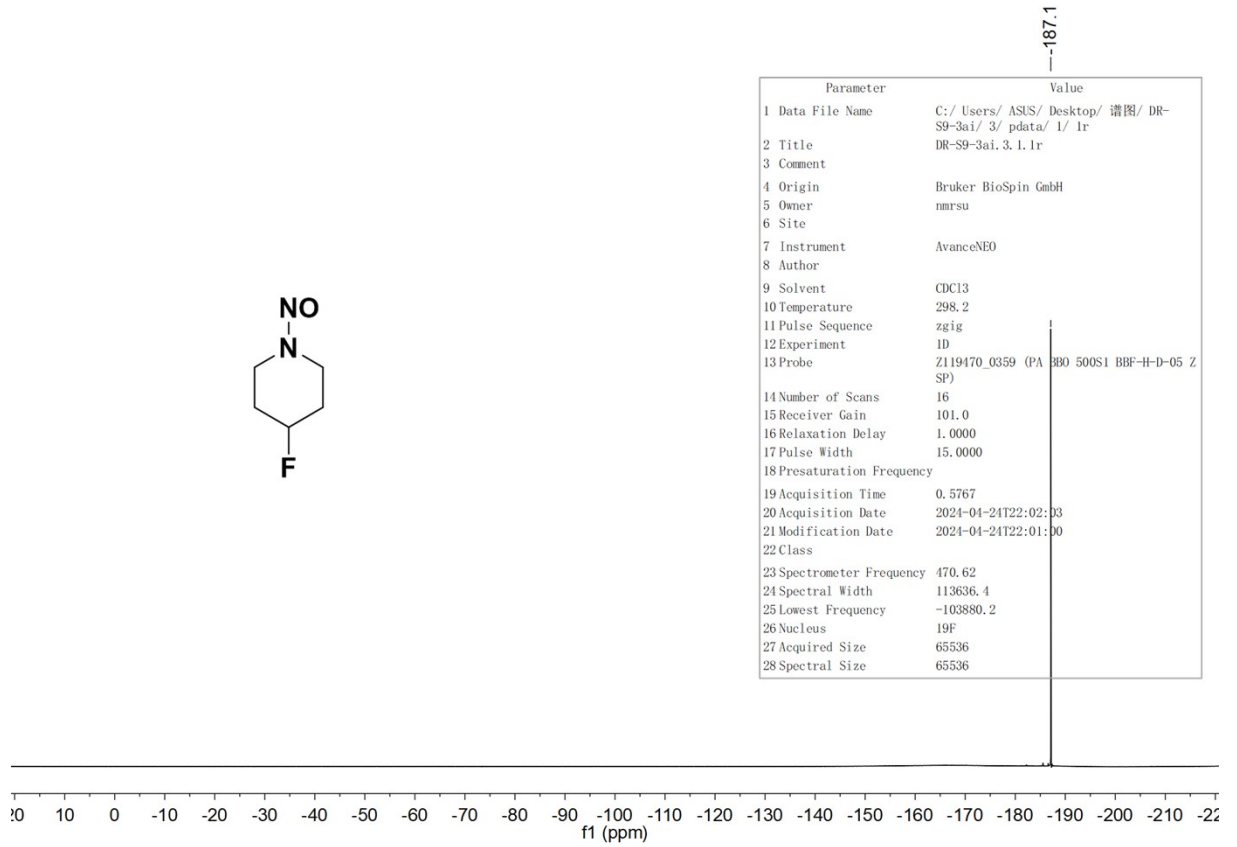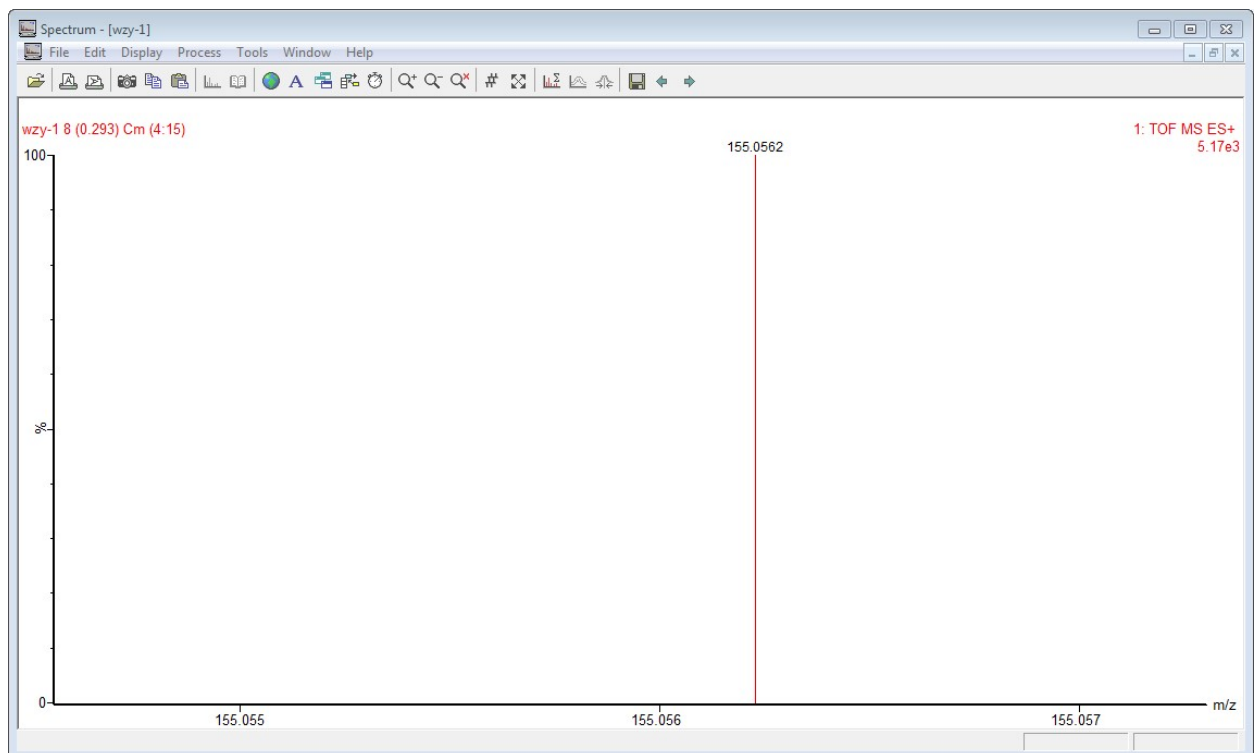

**4-chloro-1-nitrosopiperidine(3j)**

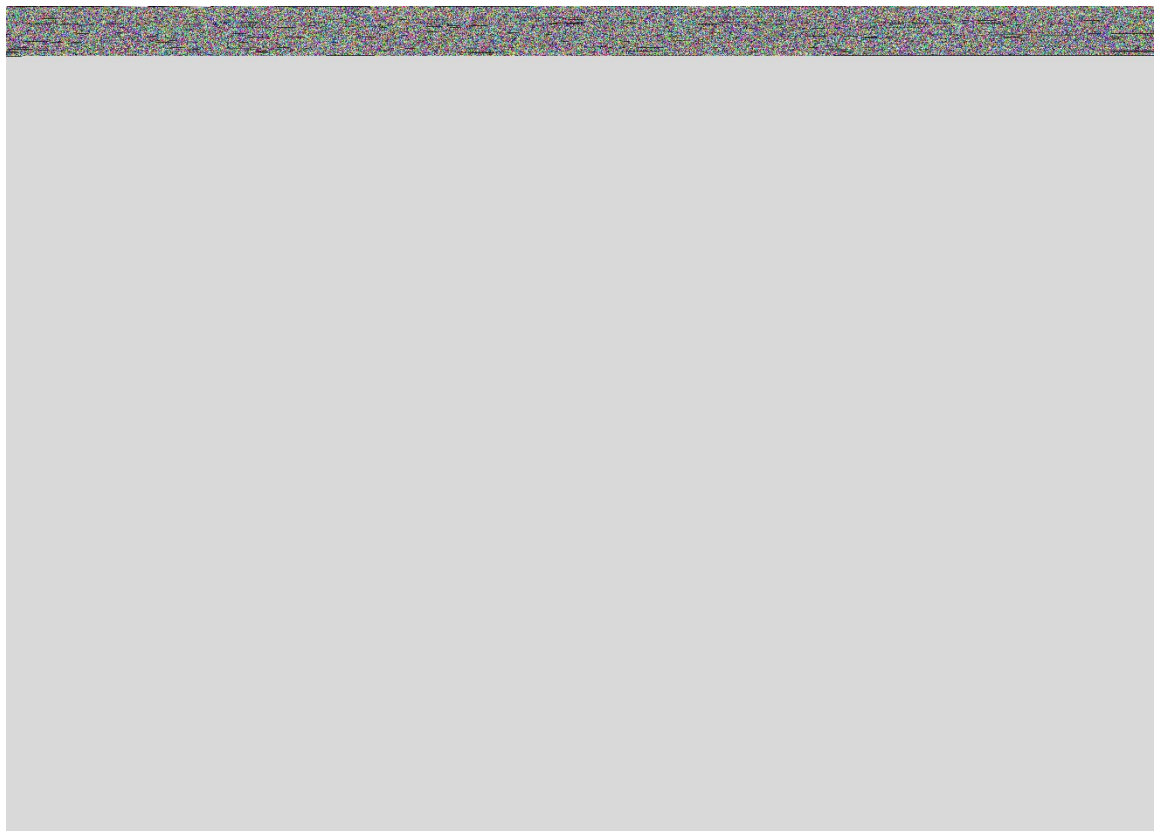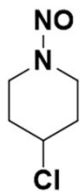

| Parameter                  | Value                                              |
|----------------------------|----------------------------------------------------|
| 1 Data File Name           | C:/Users/ASUS/Desktop/谱图/DR-S8-3ah/ 2/pdata/ 1/ 1r |
| 2 Title                    | DR-S8-3ah.2.1.1r                                   |
| 3 Comment                  |                                                    |
| 4 Origin                   | Bruker BioSpin GmbH                                |
| 5 Owner                    | nmrsu                                              |
| 6 Site                     |                                                    |
| 7 Instrument               | AvanceNEO                                          |
| 8 Author                   |                                                    |
| 9 Solvent                  | CDCl3                                              |
| 10 Temperature             | 298.2                                              |
| 11 Pulse Sequence          | zgpg30                                             |
| 12 Experiment              | 1D                                                 |
| 13 Probe                   | Z119470_0339 (PA BBO 500S1 BBF-H-D-05 Z SP)        |
| 14 Number of Scans         | 256                                                |
| 15 Receiver Gain           | 101.0                                              |
| 16 Relaxation Delay        | 2.0000                                             |
| 17 Pulse Width             | 10.0000                                            |
| 18 Presaturation Frequency |                                                    |
| 19 Acquisition Time        | 1.0879                                             |
| 20 Acquisition Date        | 2024-04-12 23:06:27                                |
| 21 Modification Date       | 2024-04-12 23:05:06                                |
| 22 Class                   |                                                    |
| 23 Spectrometer Frequency  | 125.77                                             |
| 24 Spectral Width          | 30120.5                                            |
| 25 Lowest Frequency        | -483.7                                             |
| 26 Nucleus                 | <sup>13</sup> C                                    |
| 27 Acquired Size           | 34768                                              |
| 28 Spectral Size           | 34768                                              |

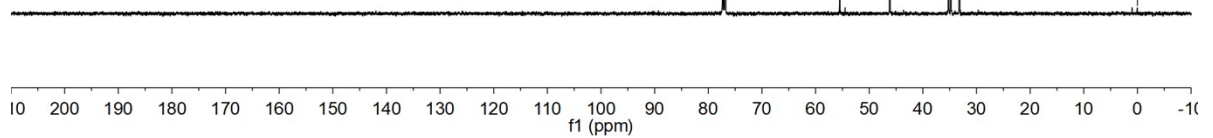

**1-nitroso-4-(trifluoromethyl)piperidine(3k)**

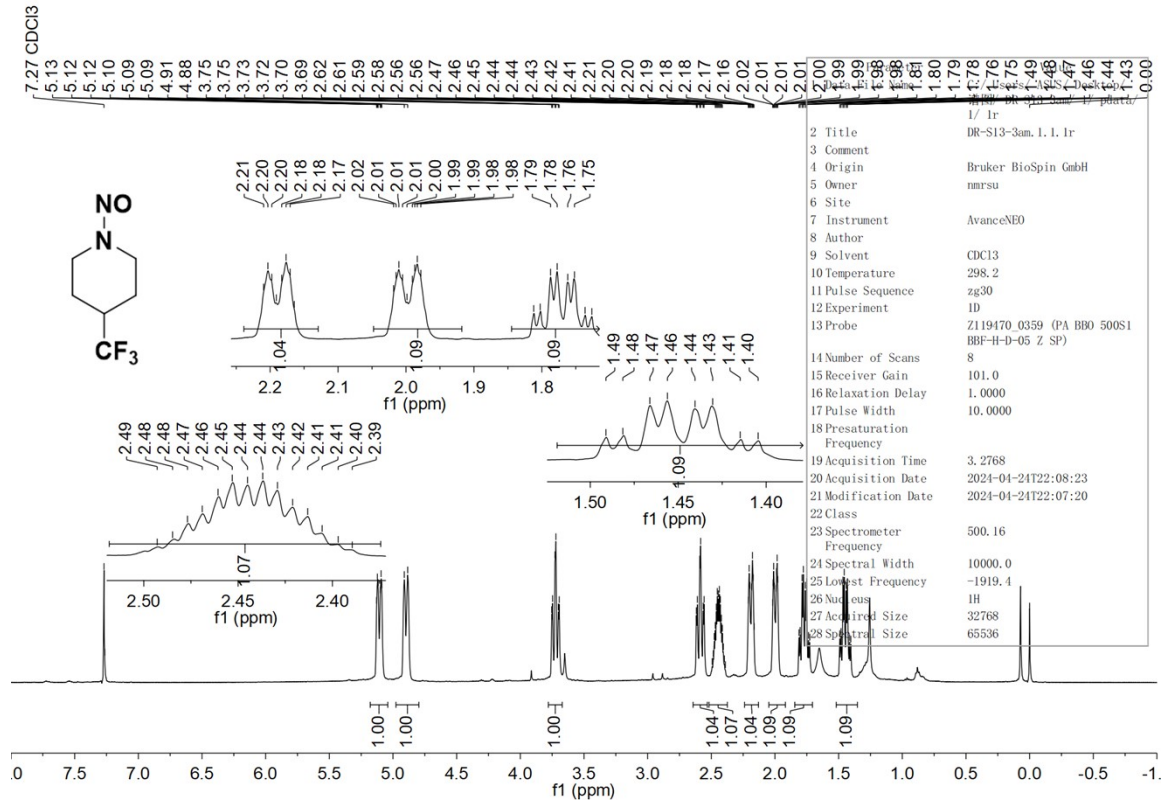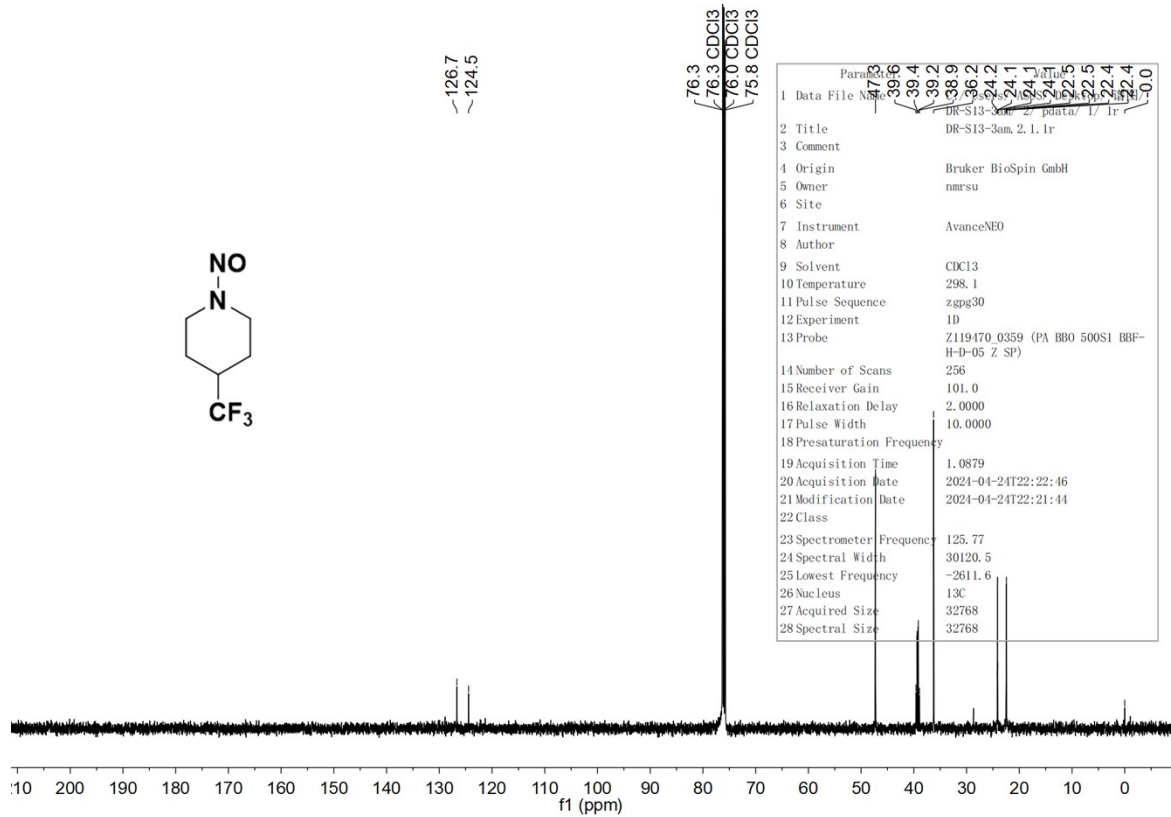

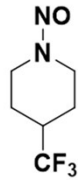

| Parameter                  | Value                                                  |
|----------------------------|--------------------------------------------------------|
| 1 Data File Name           | C:/Users/ASUS/Desktop/ 谱图/ DR-S13-3am/ 3/ pdata/ 1/ 1r |
| 2 Title                    | DR-S13-3am.3.1.1r                                      |
| 3 Comment                  |                                                        |
| 4 Origin                   | Bruker BioSpin GmbH                                    |
| 5 Owner                    | mrsu                                                   |
| 6 Site                     |                                                        |
| 7 Instrument               | AvanceNEO                                              |
| 8 Author                   |                                                        |
| 9 Solvent                  | CDCl3                                                  |
| 10 Temperature             | 298.2                                                  |
| 11 Pulse Sequence          | zgig                                                   |
| 12 Experiment              | 1D                                                     |
| 13 Probe                   | Z119470_0359 (PA BBO 500S1 BBF-H-D-05 Z SP)            |
| 14 Number of Scans         | 16                                                     |
| 15 Receiver Gain           | 101.0                                                  |
| 16 Relaxation Delay        | 1.0000                                                 |
| 17 Pulse Width             | 15.0000                                                |
| 18 Presaturation Frequency |                                                        |
| 19 Acquisition Time        | 0.5767                                                 |
| 20 Acquisition Date        | 2024-04-24T22:24:45                                    |
| 21 Modification Date       | 2024-04-24T22:23:42                                    |
| 22 Class                   |                                                        |
| 23 Spectrometer Frequency  | 470.62                                                 |
| 24 Spectral Width          | 113636.4                                               |
| 25 Lowest Frequency        | -103880.2                                              |
| 26 Nucleus                 | 19F                                                    |
| 27 Acquired Size           | 65536                                                  |
| 28 Spectral Size           | 65536                                                  |

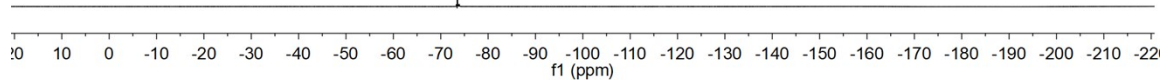

### 1-nitroso-4-phenylpyrrolidine(3l)

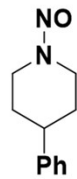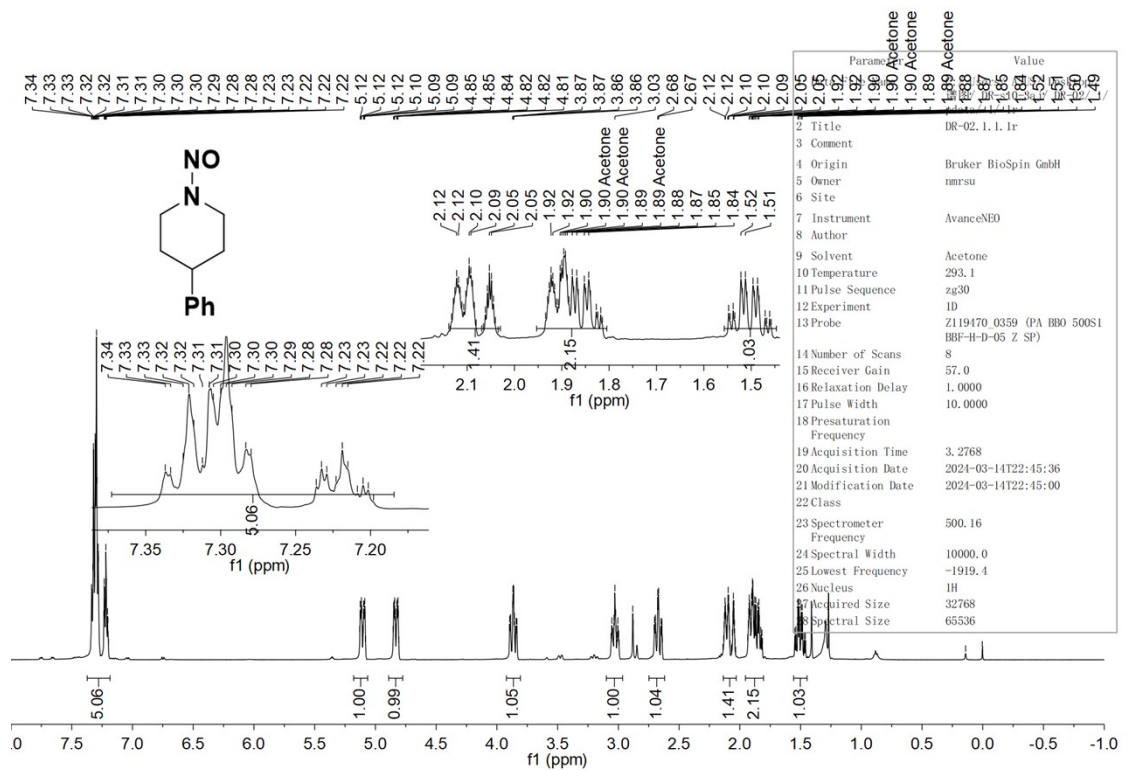

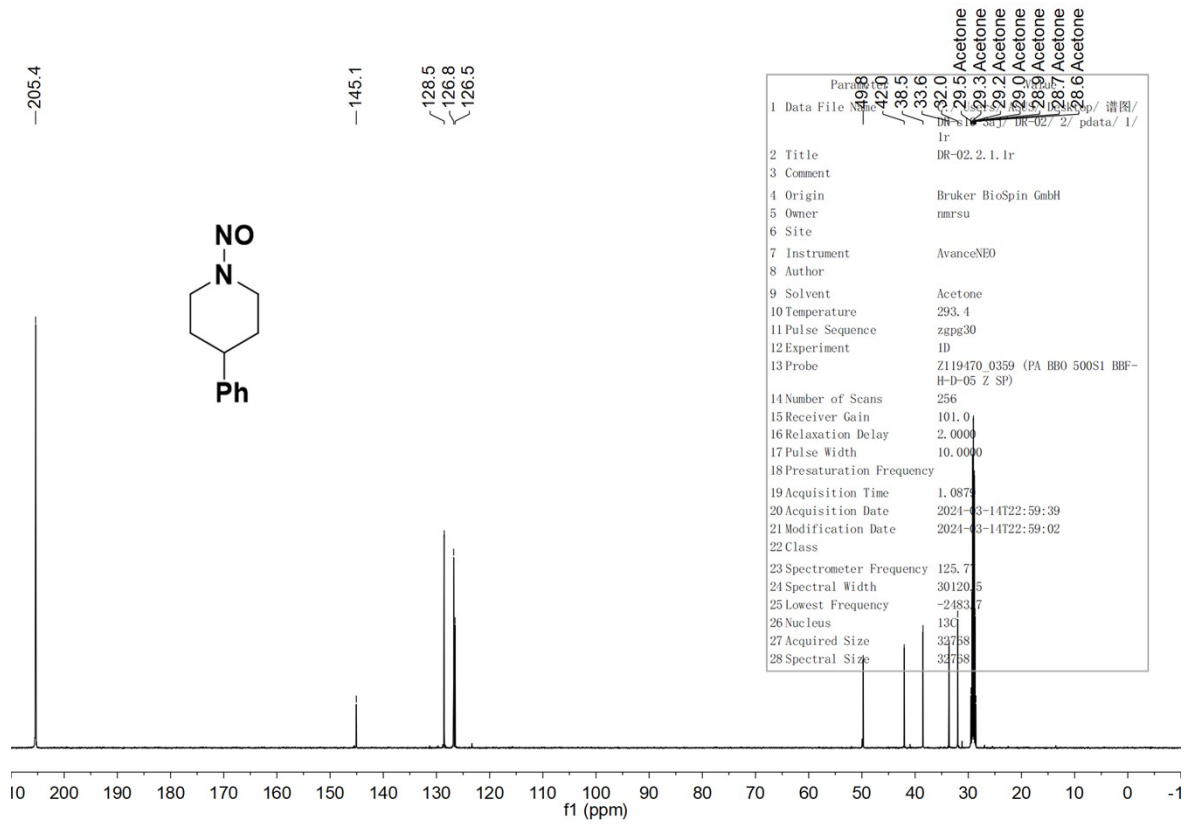

### 8-nitroso-1,4-dioxa-8-azaspiro[4.5]decane(3m)

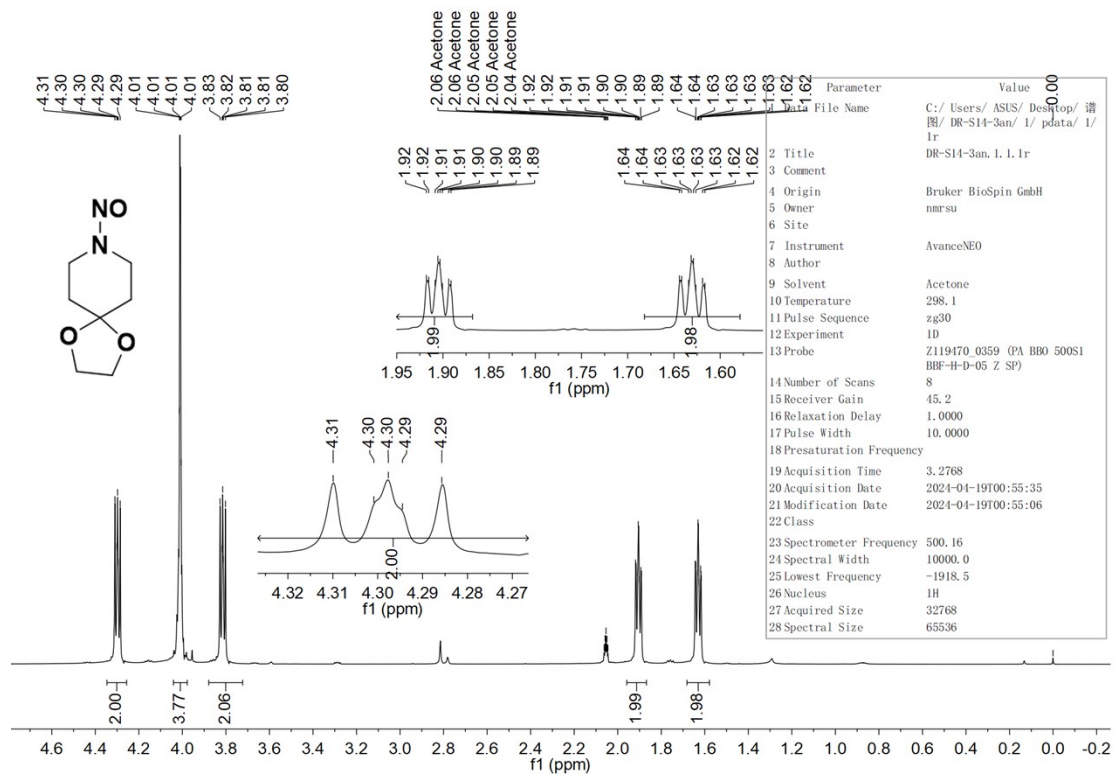

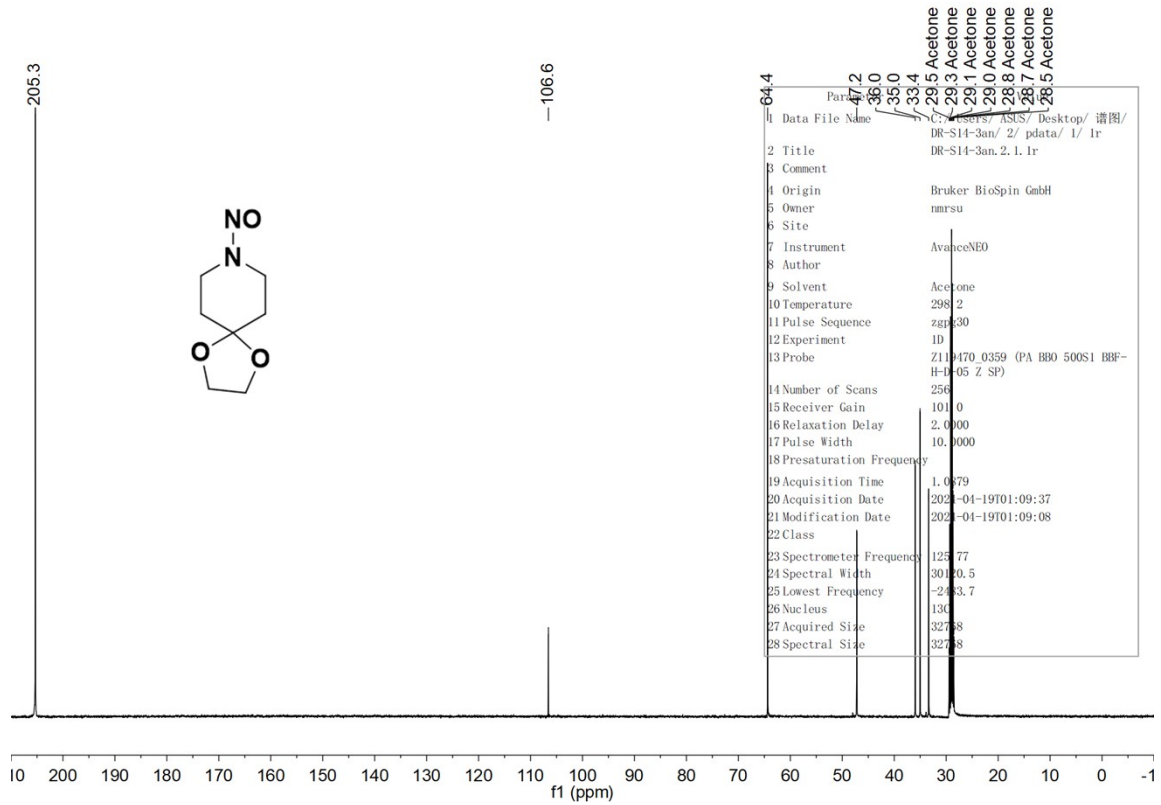

### 2,2,6,6-tetramethyl-1-nitrosopiperidine (3n)

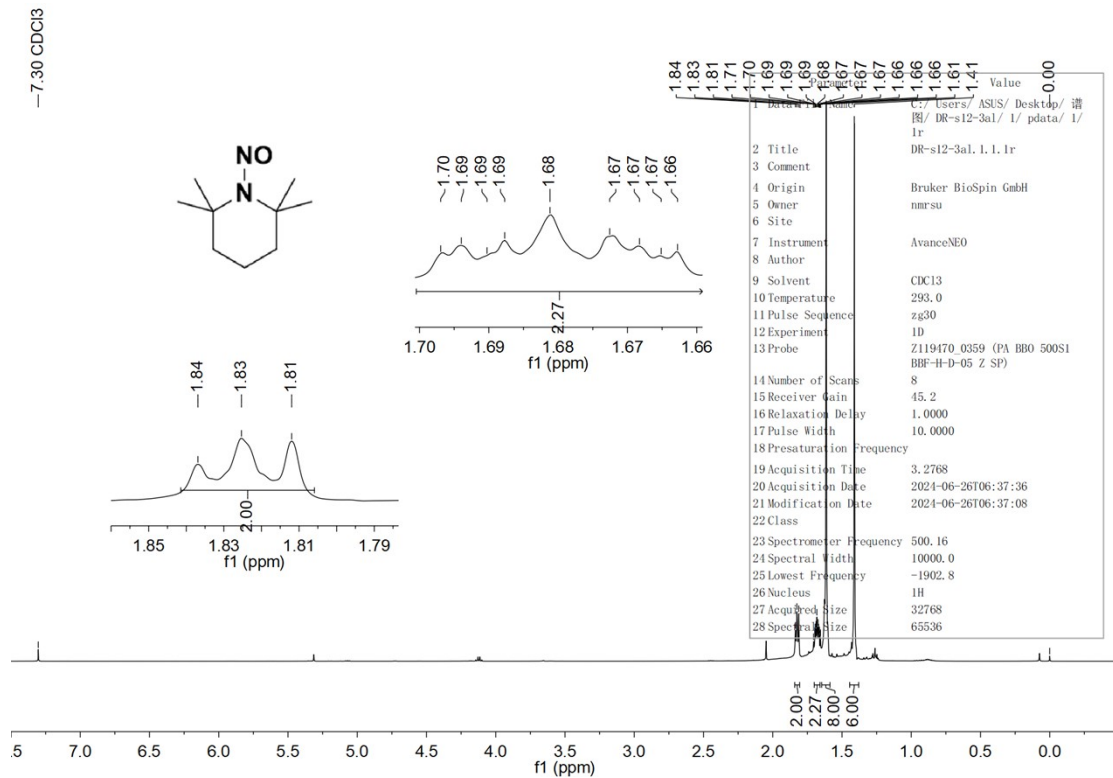

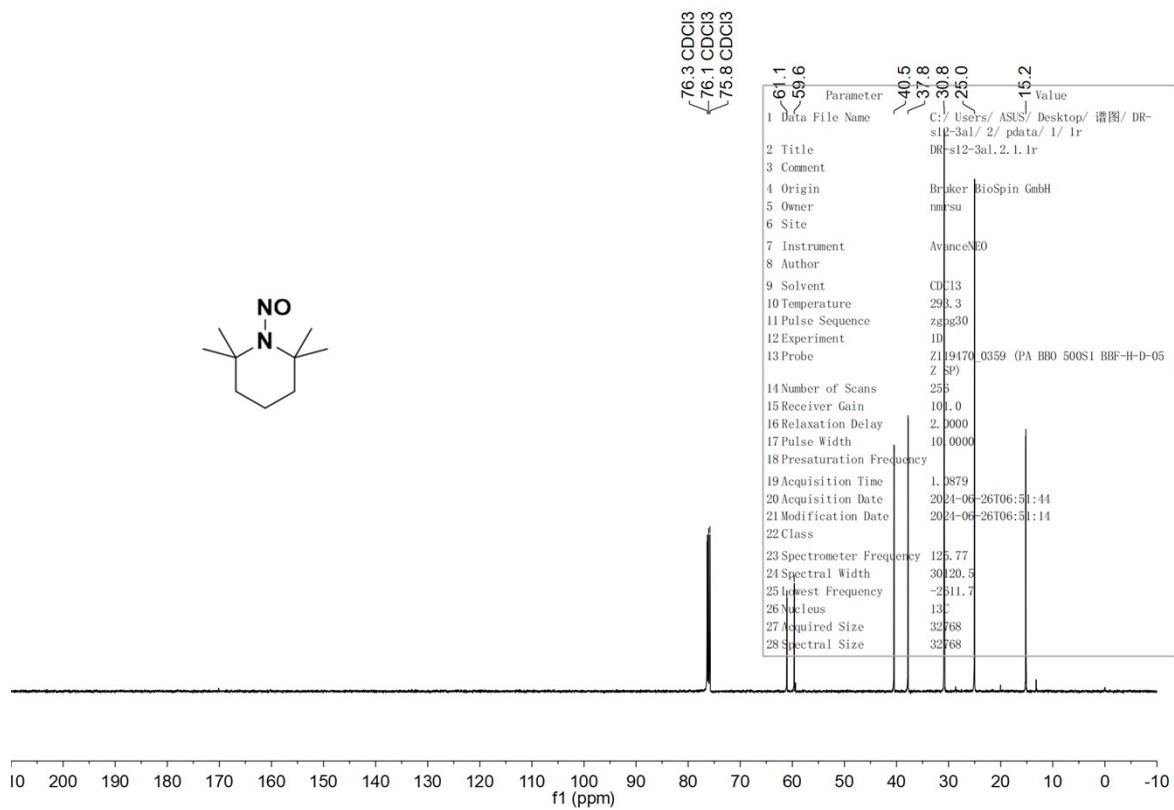

### 1,4-dinitrosopiperazine(3o)

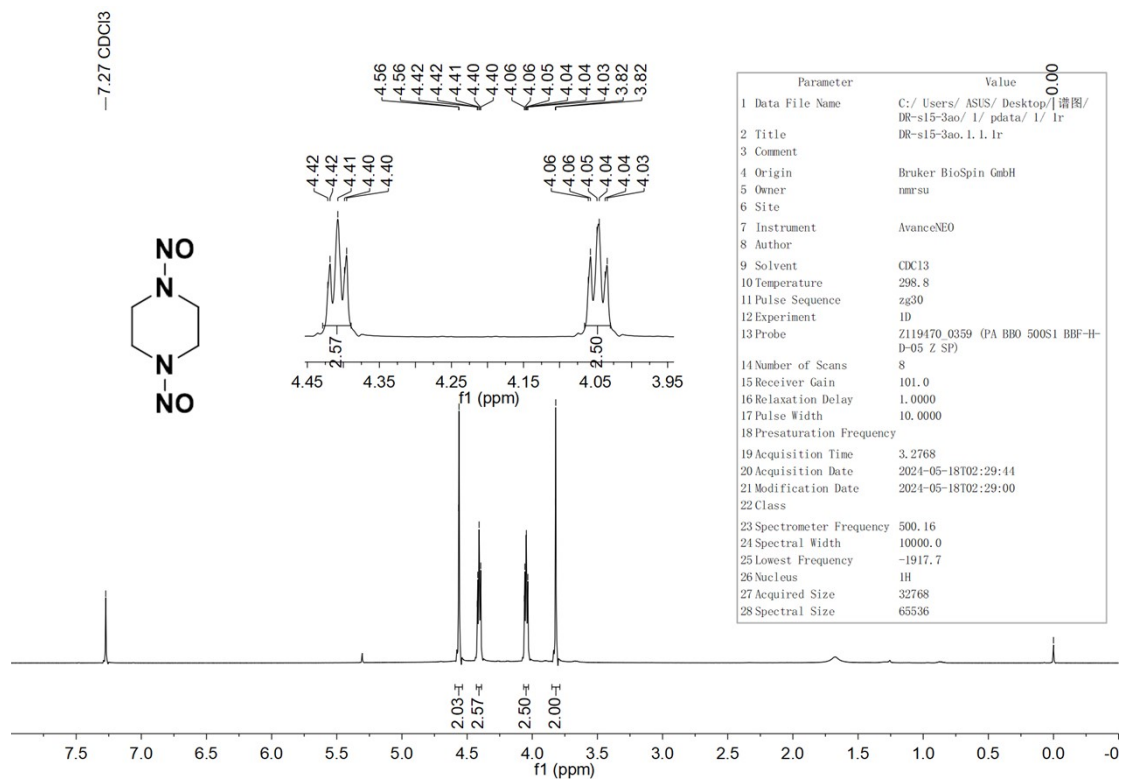



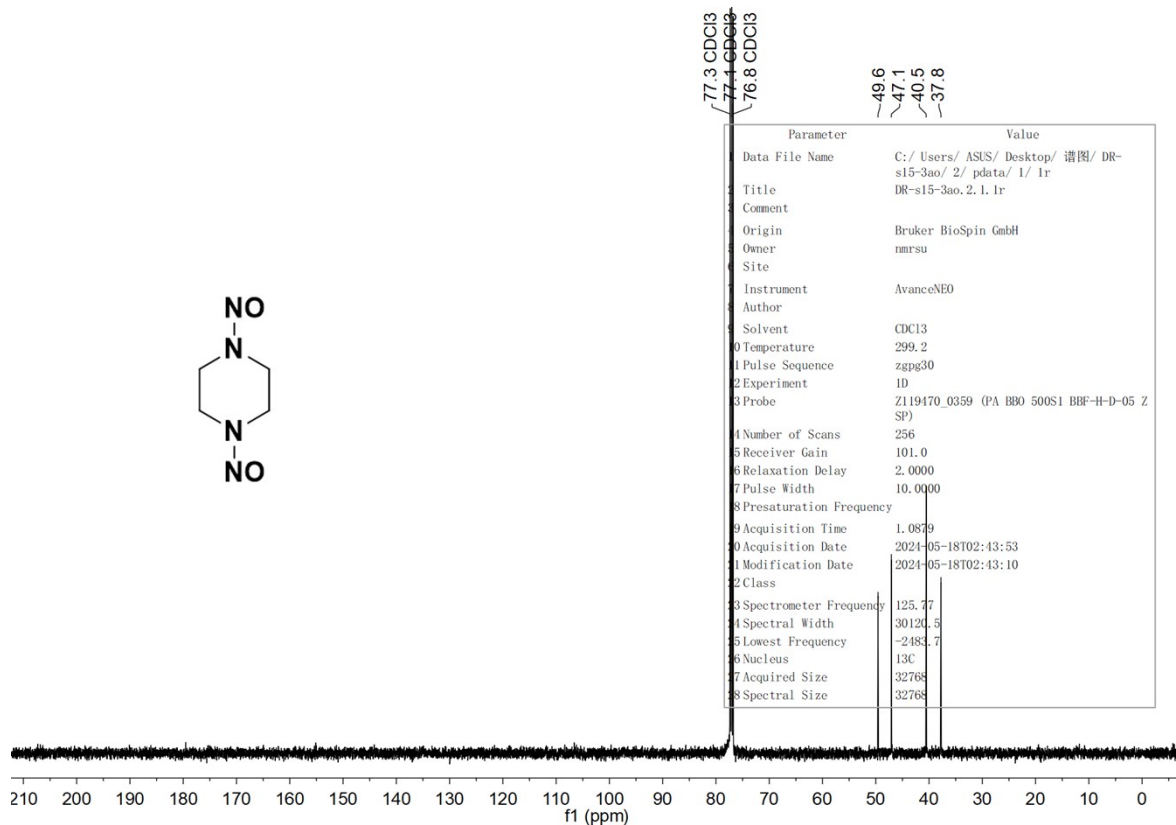

### 4-nitrosopiperazine-1-carbaldehyde(3p)

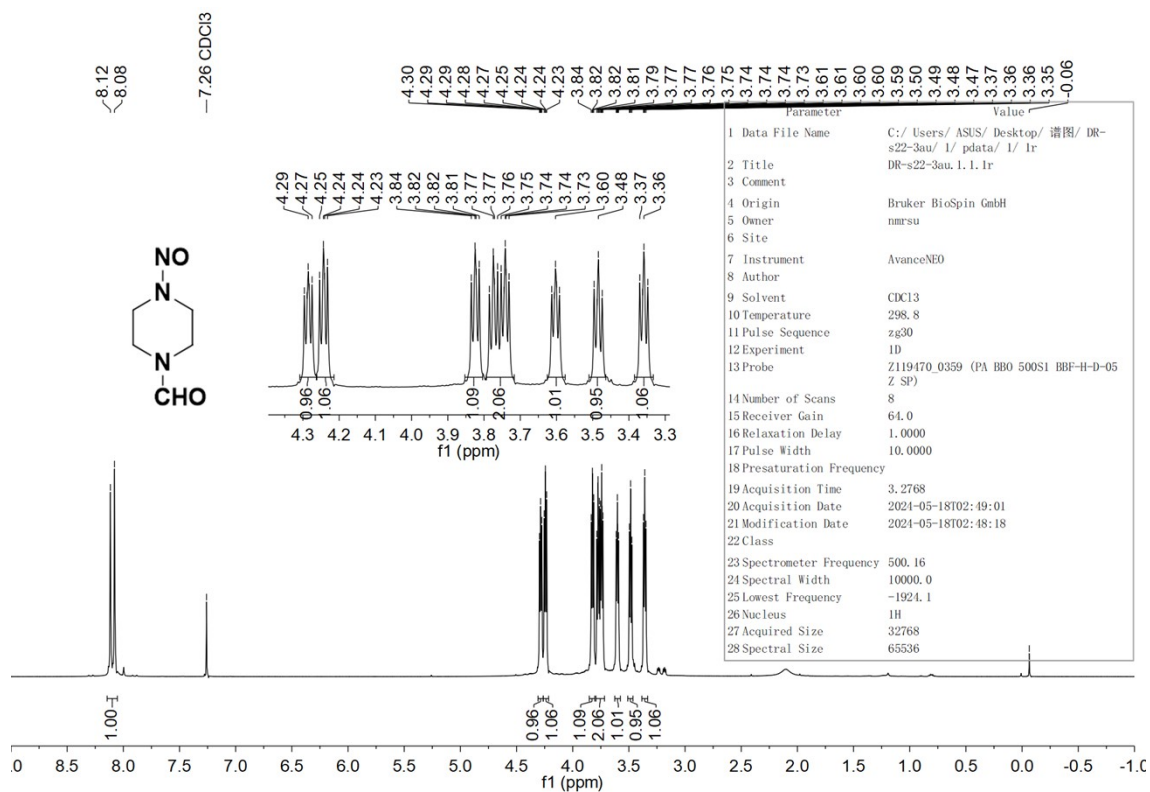

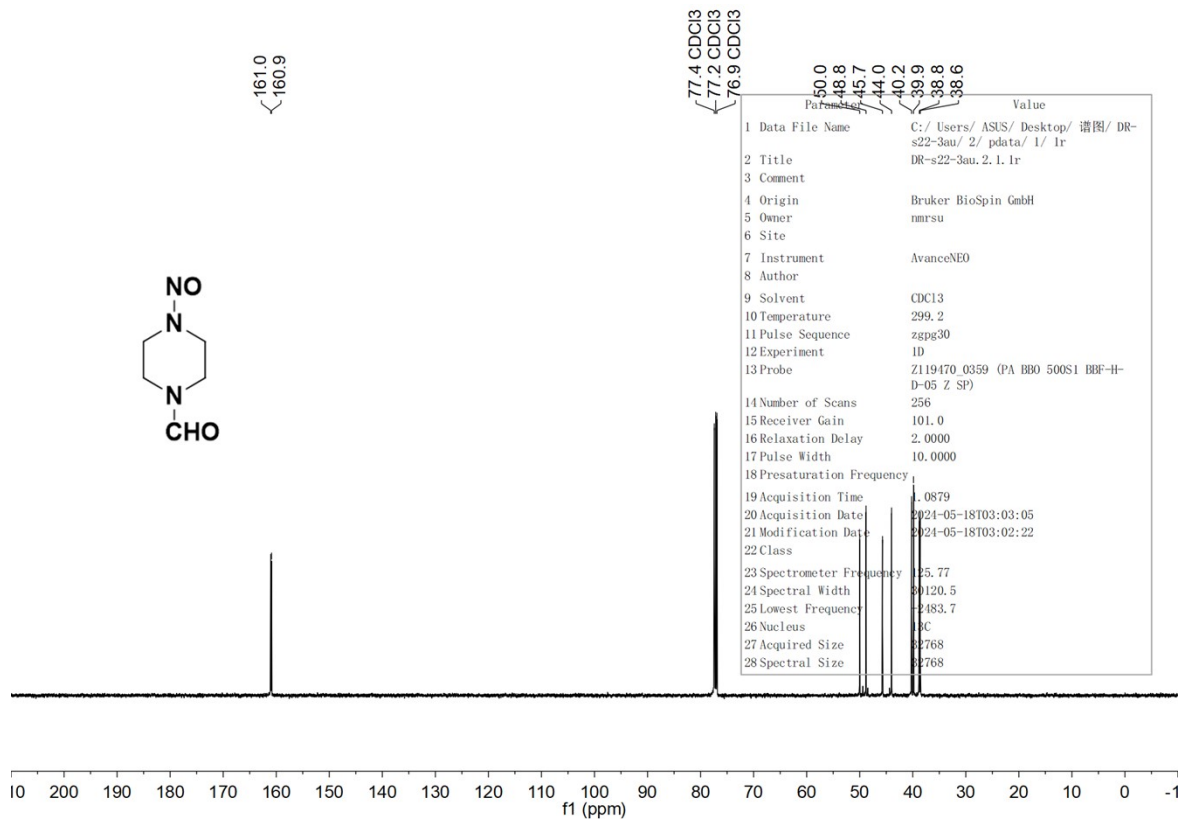

**tert-butyl 4-nitrosopiperazine-1-carboxylate(3q)**

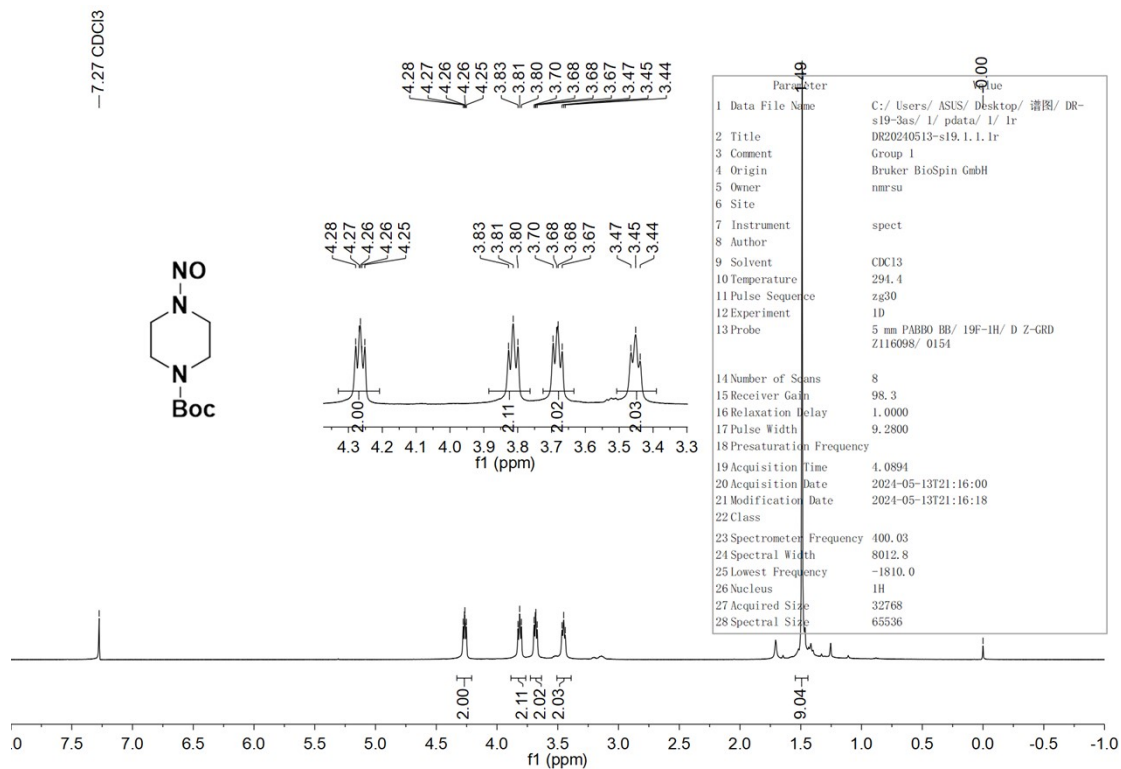

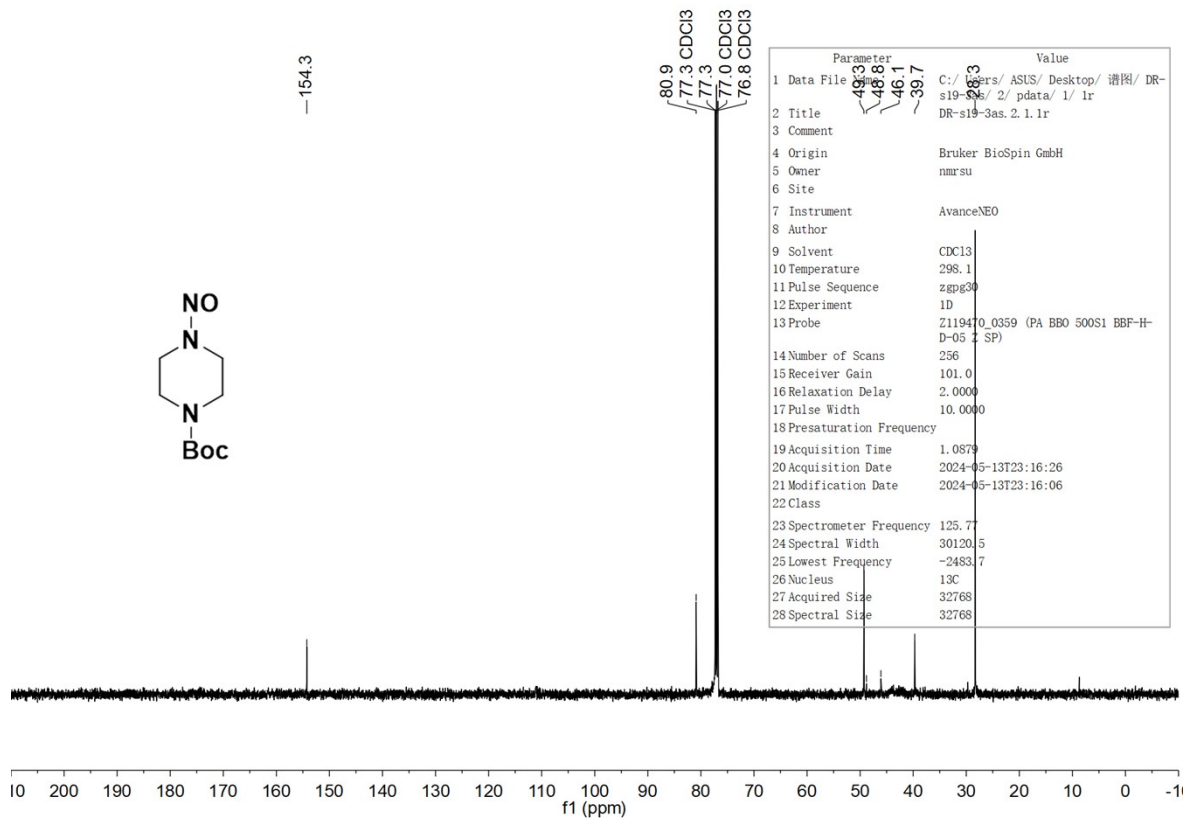

### 1-nitroso-4-phenylpiperazine(3r)

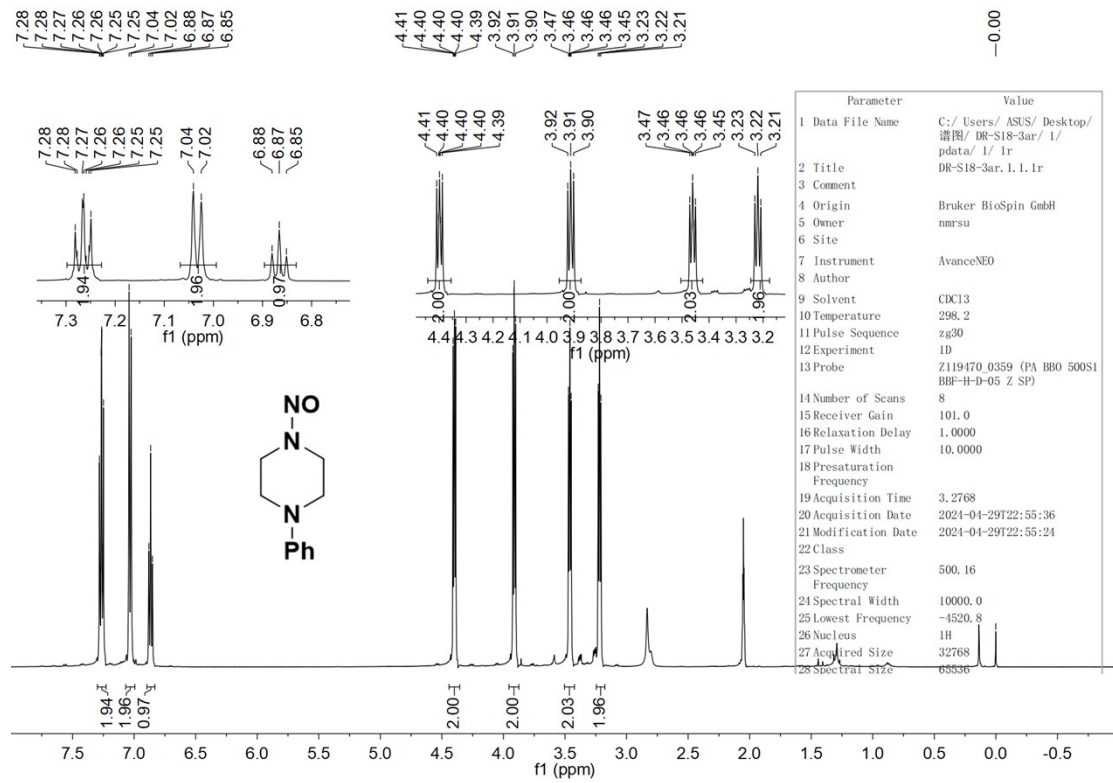

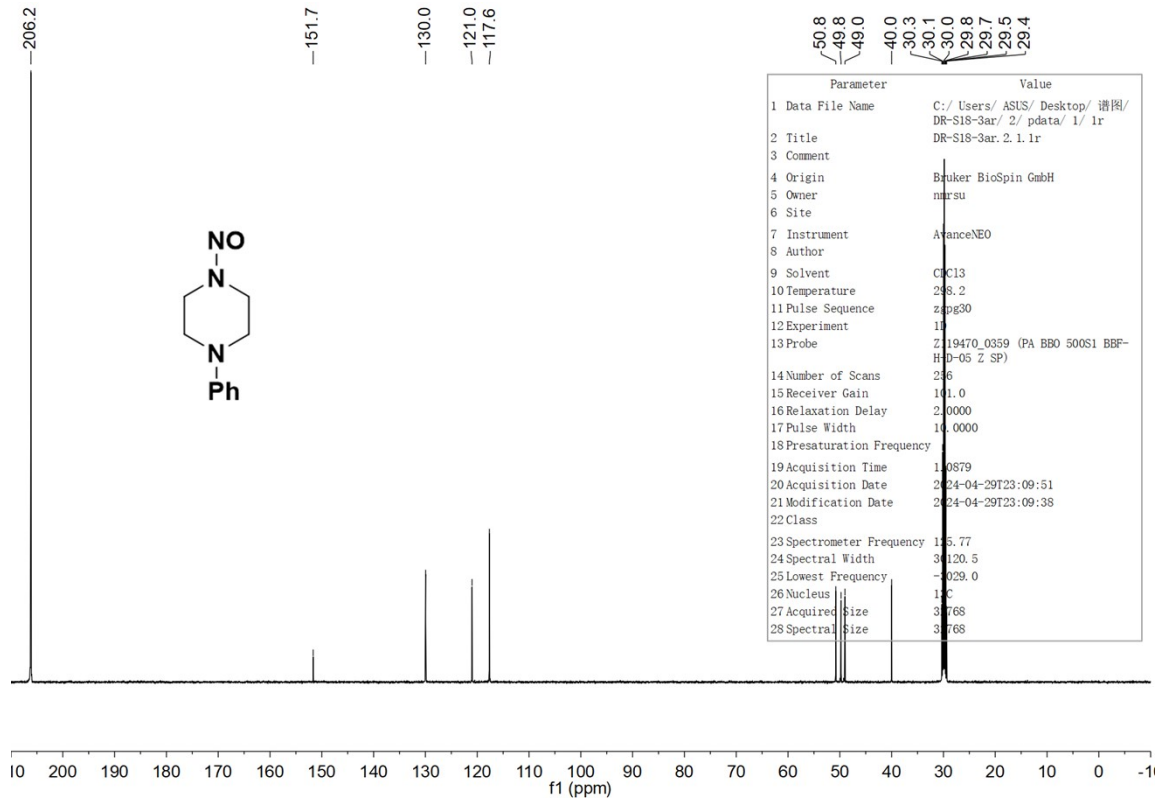

### 1-nitrosopyrrolidine(3s)

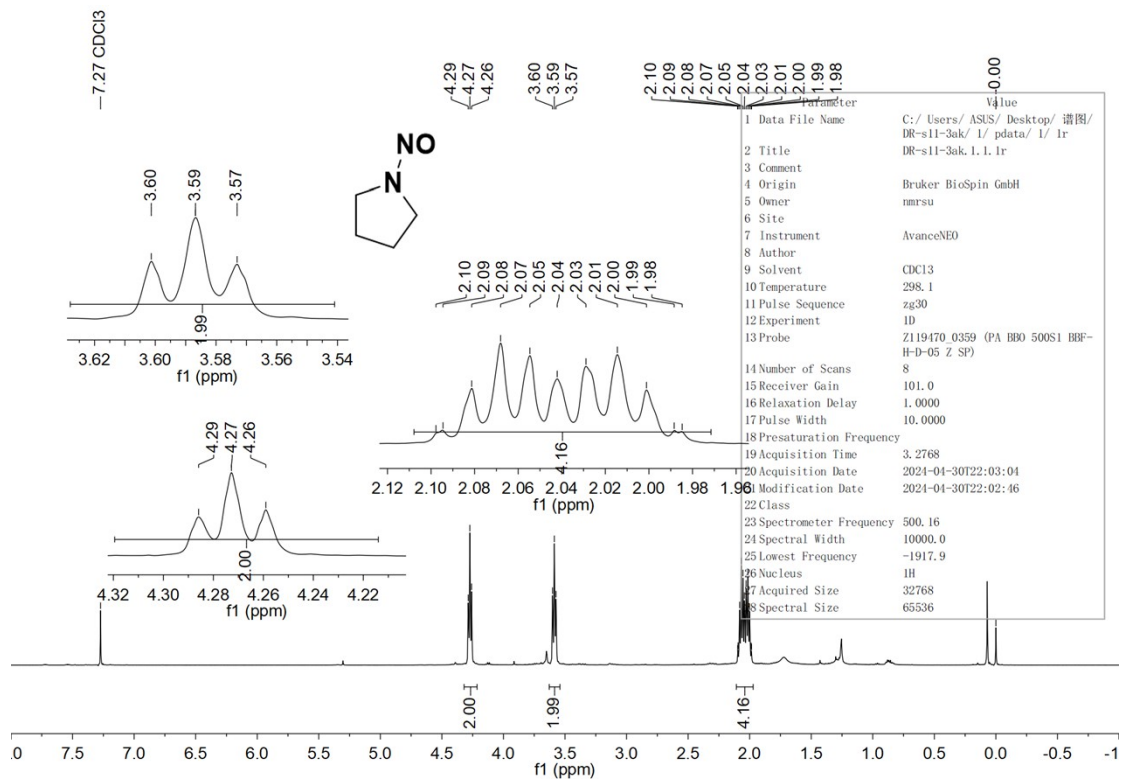

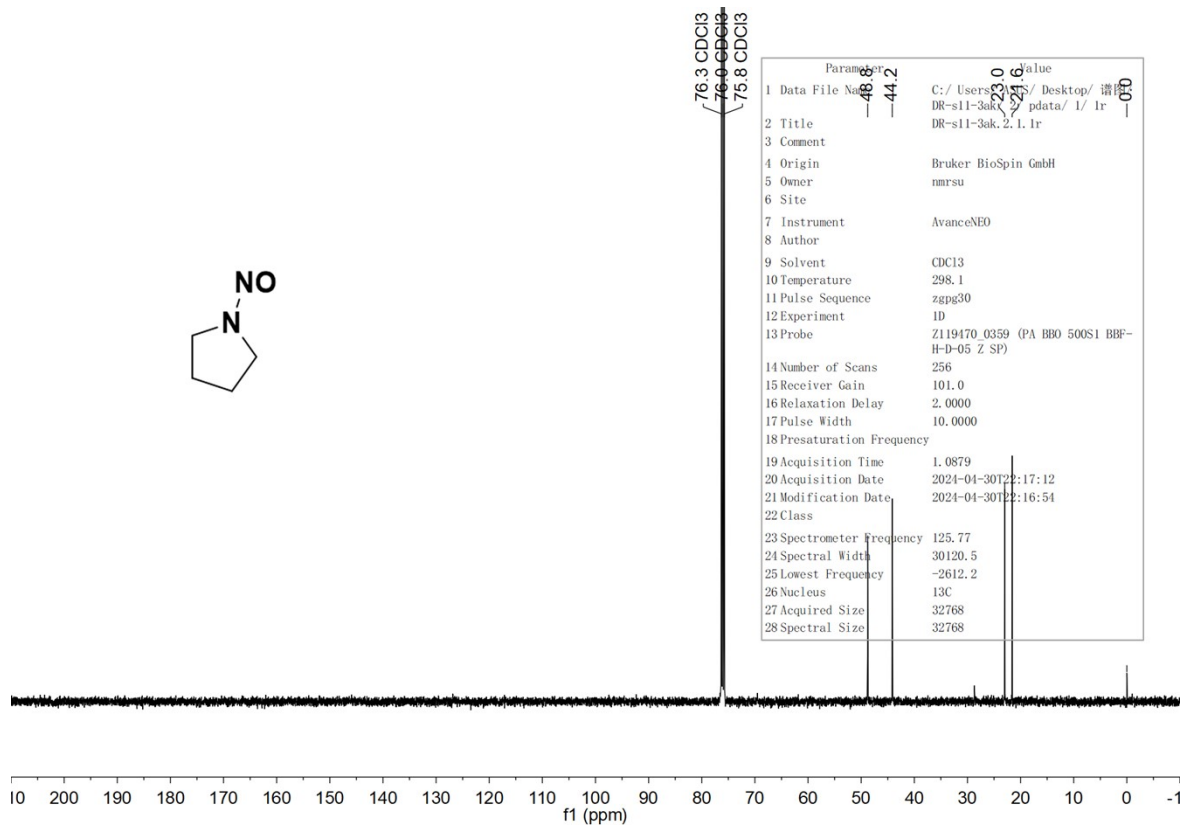

## 2-nitroso-1,2,3,4-tetrahydroisoquinoline(3t)

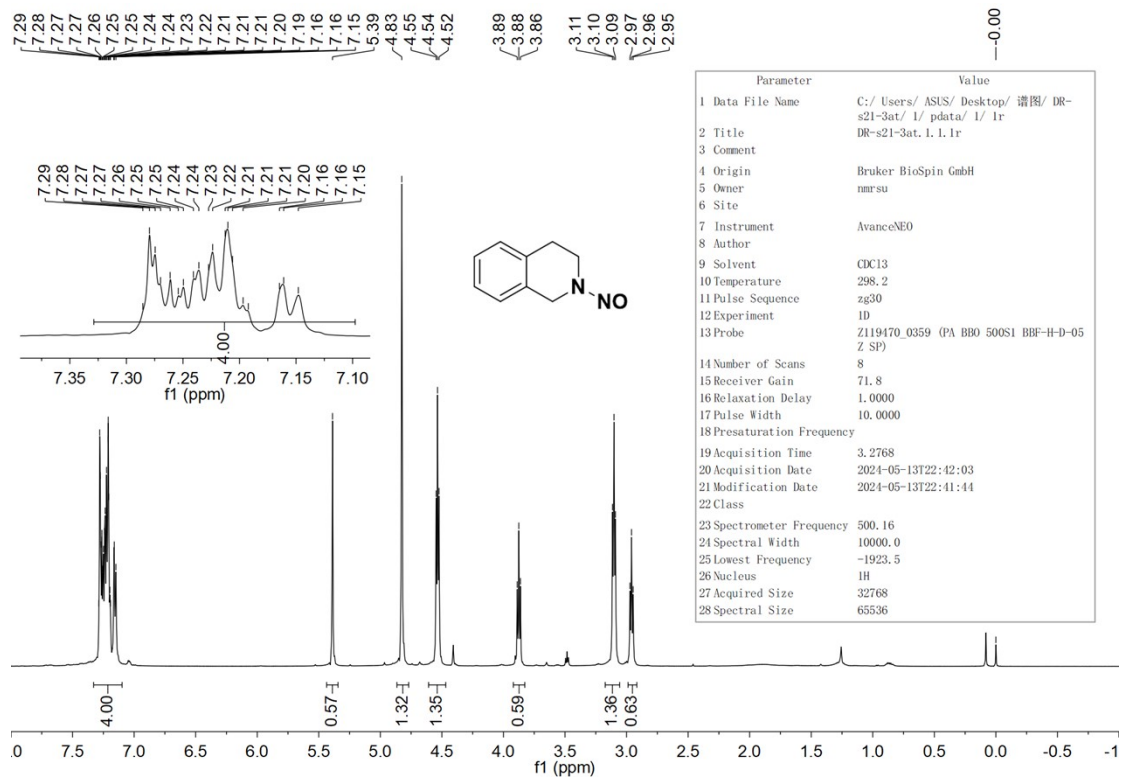

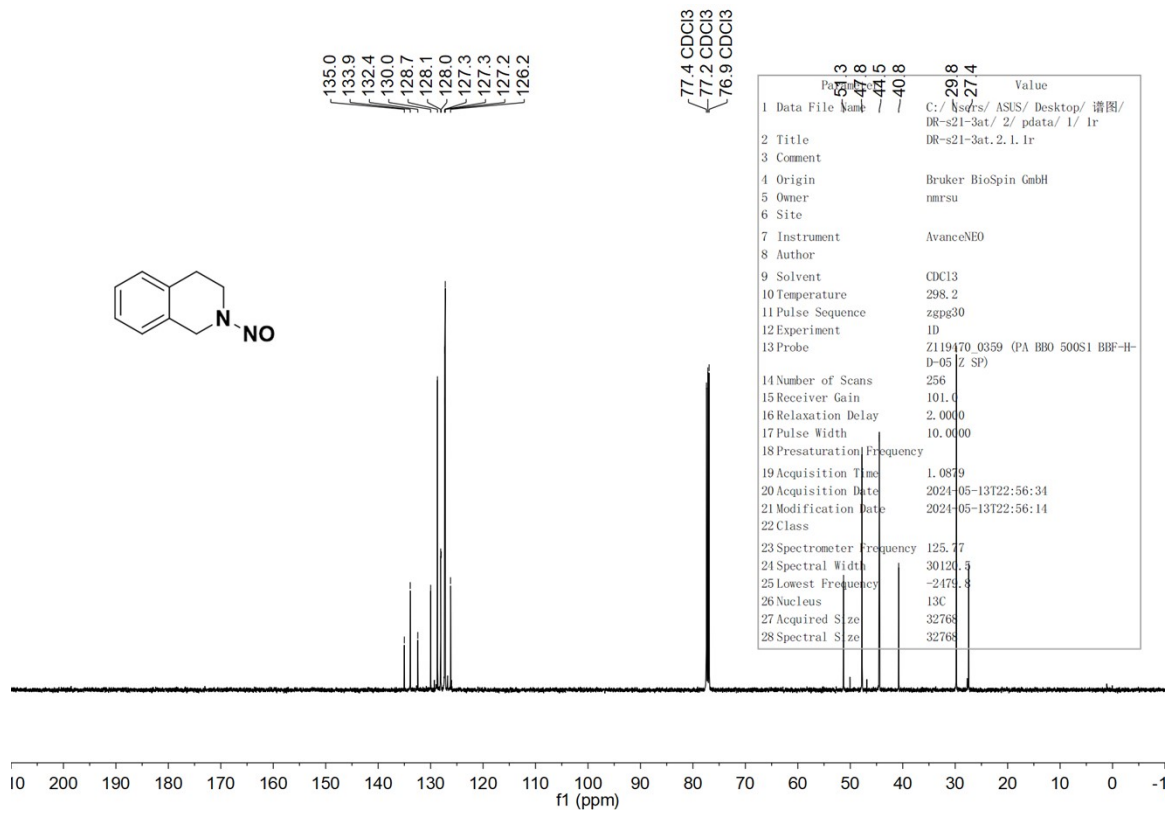

### 2-nitrosoisoindoline(3u)

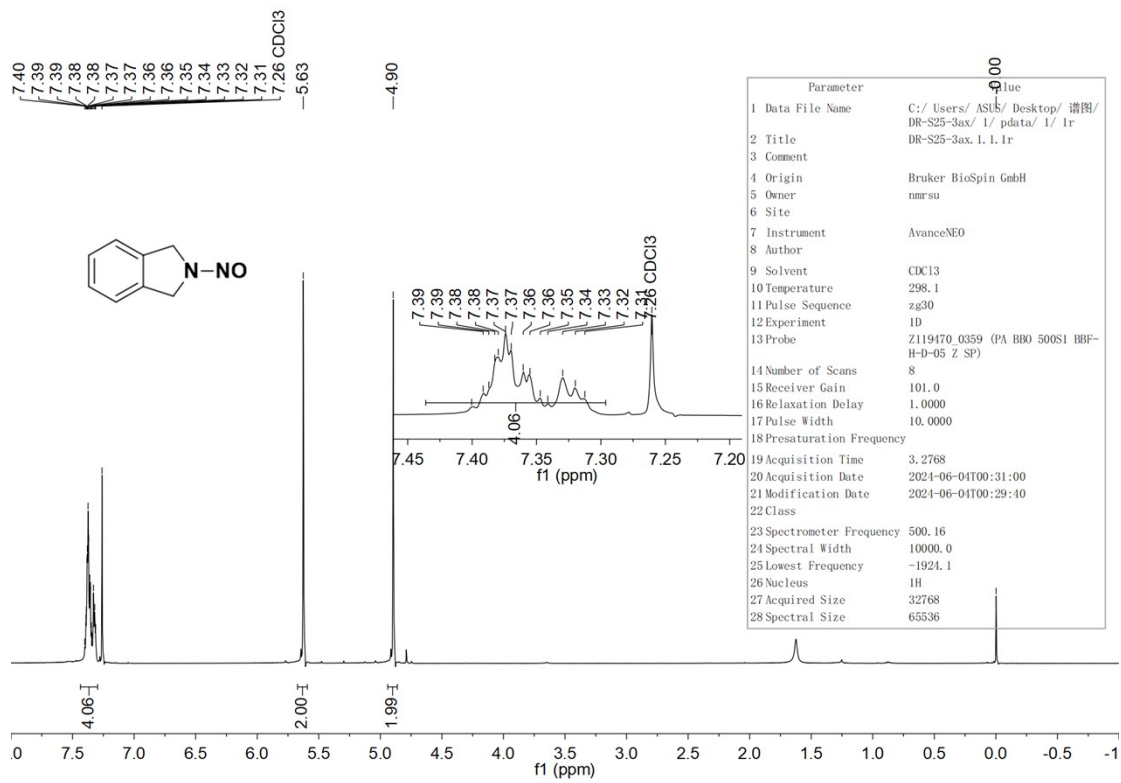

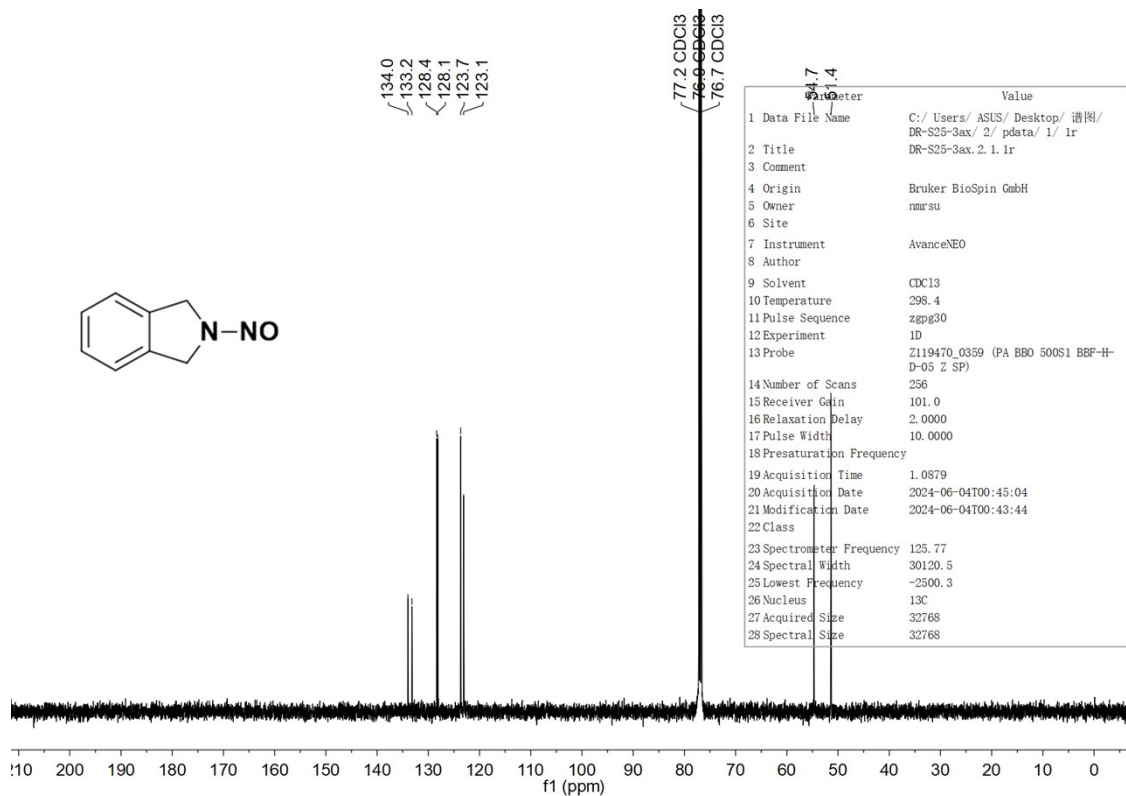

### N,N-dibutylnitrous amide(3v)

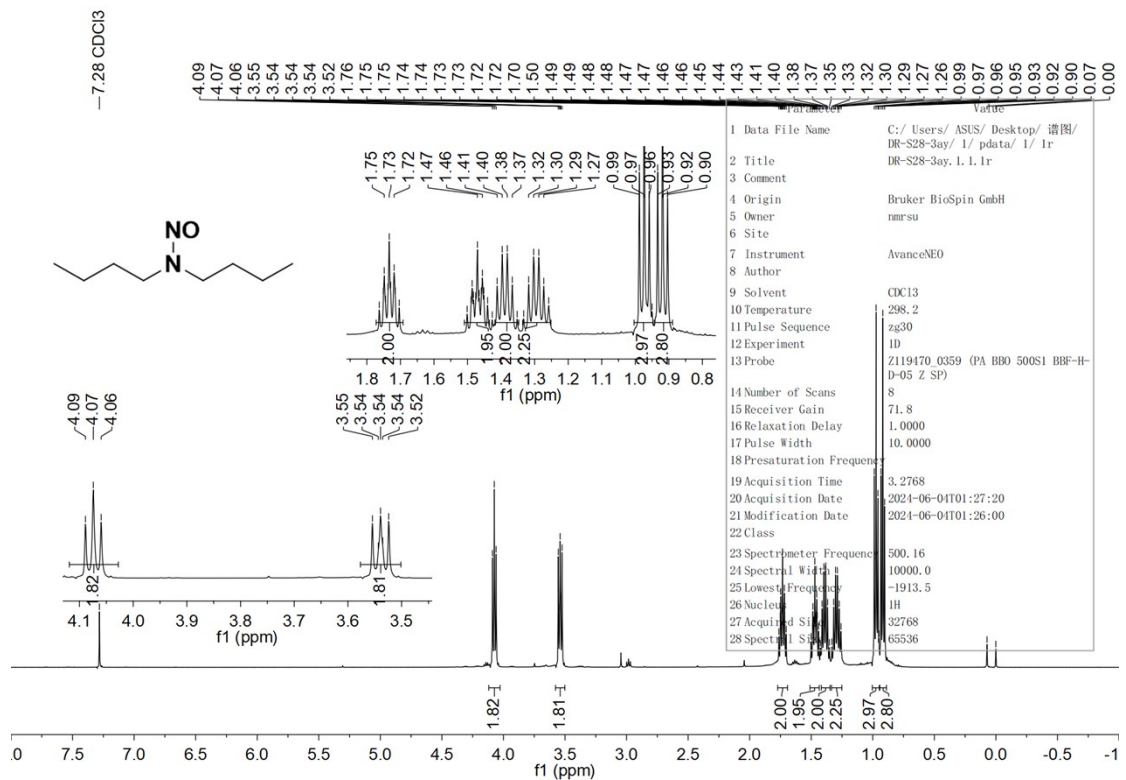

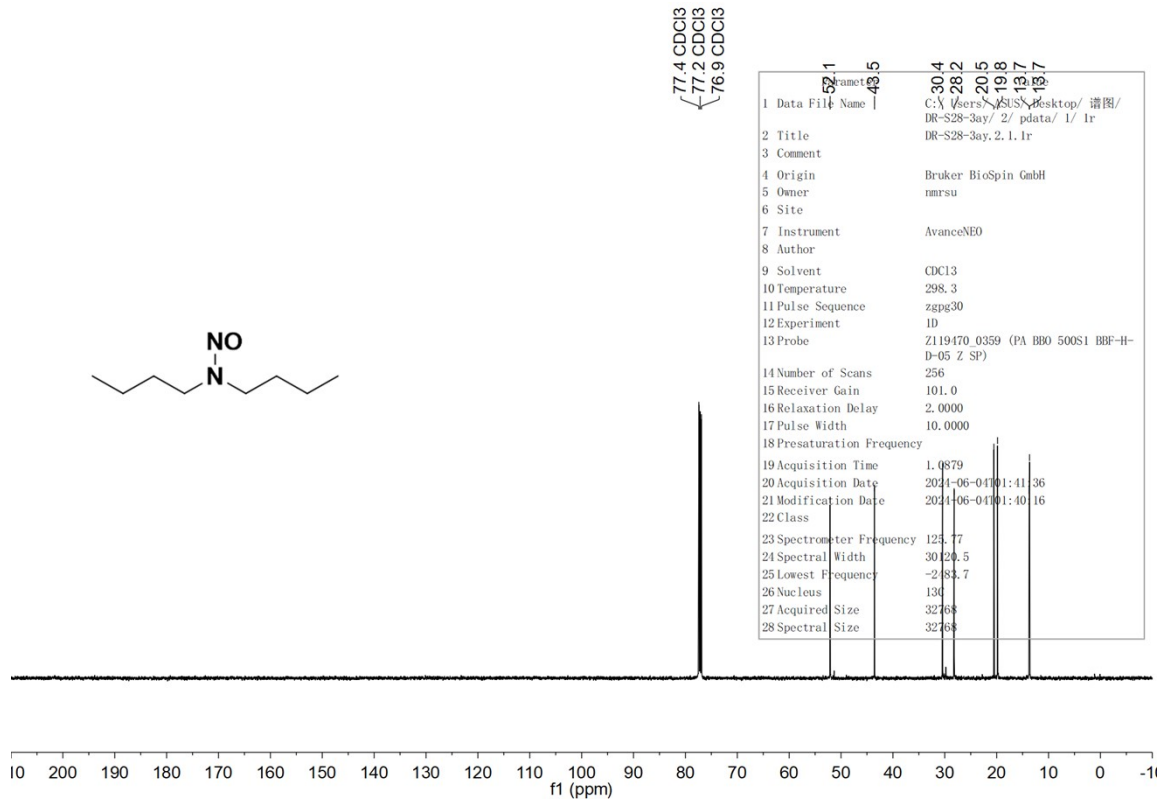

### N-butyl-N-methylnitrosamine (3w)

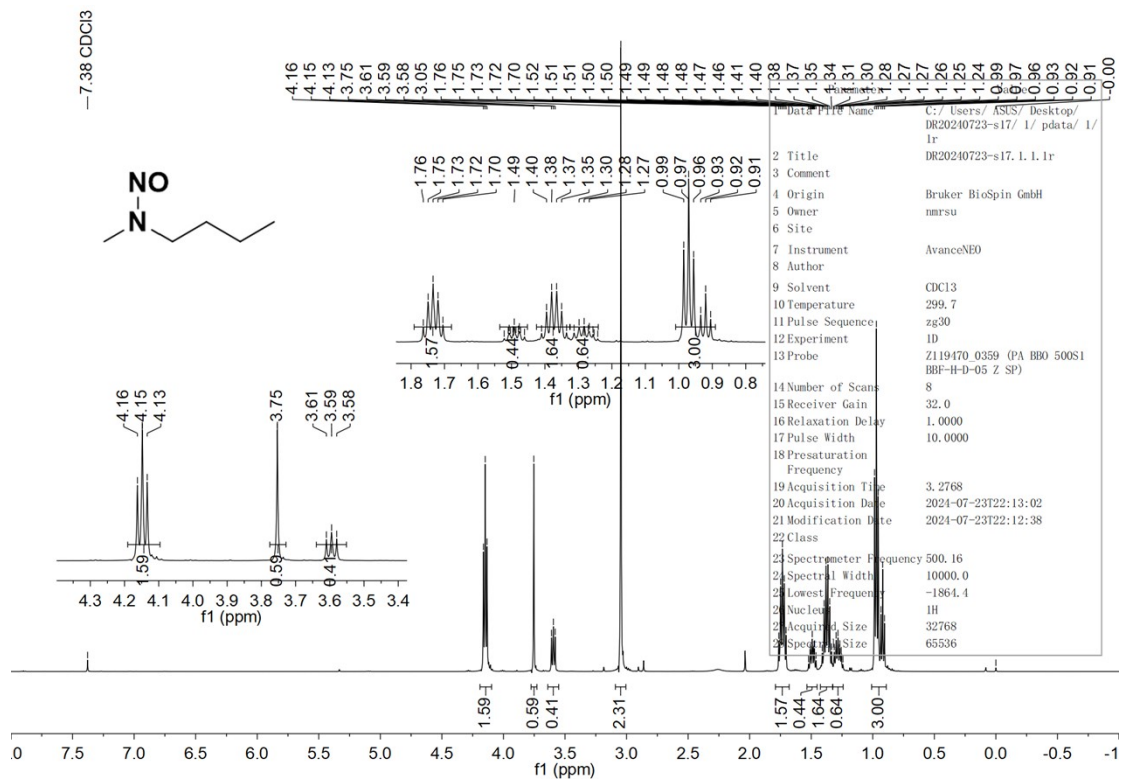





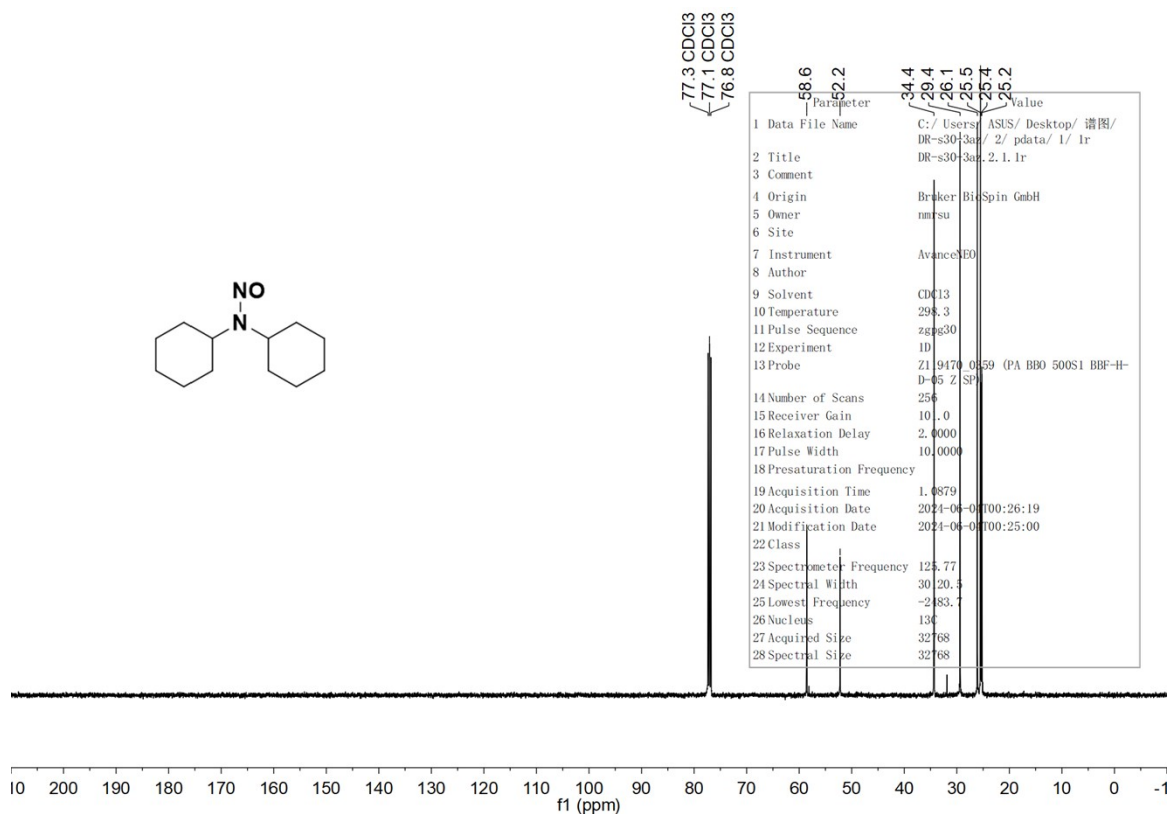

### N-benzyl-N-methylnitrous amide(3y)

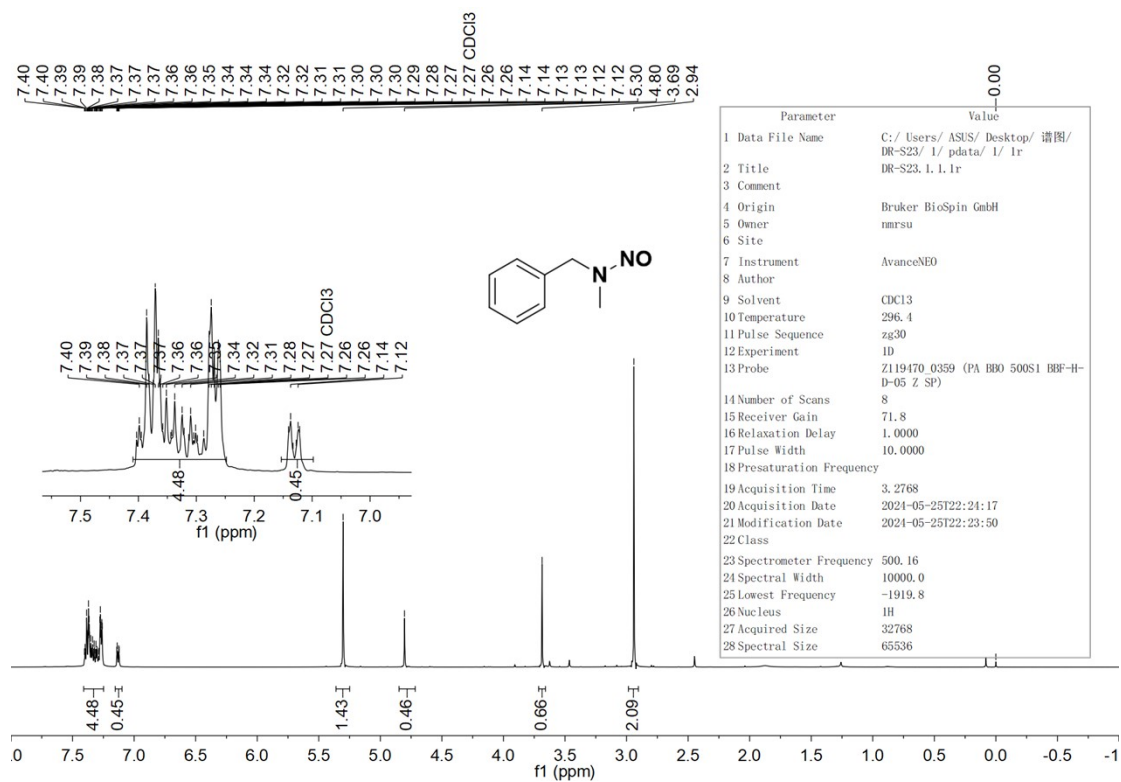

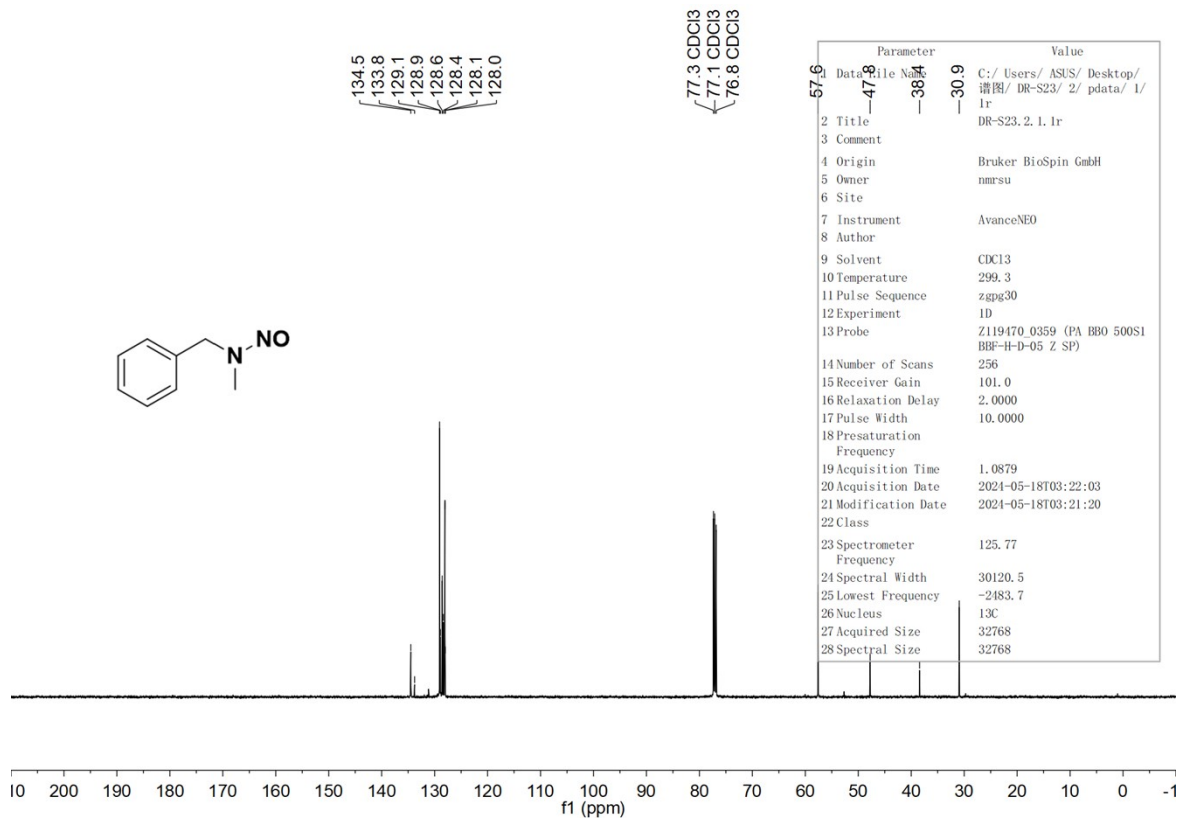

### N-methyl-N-phenethylnitrous amide(3z)

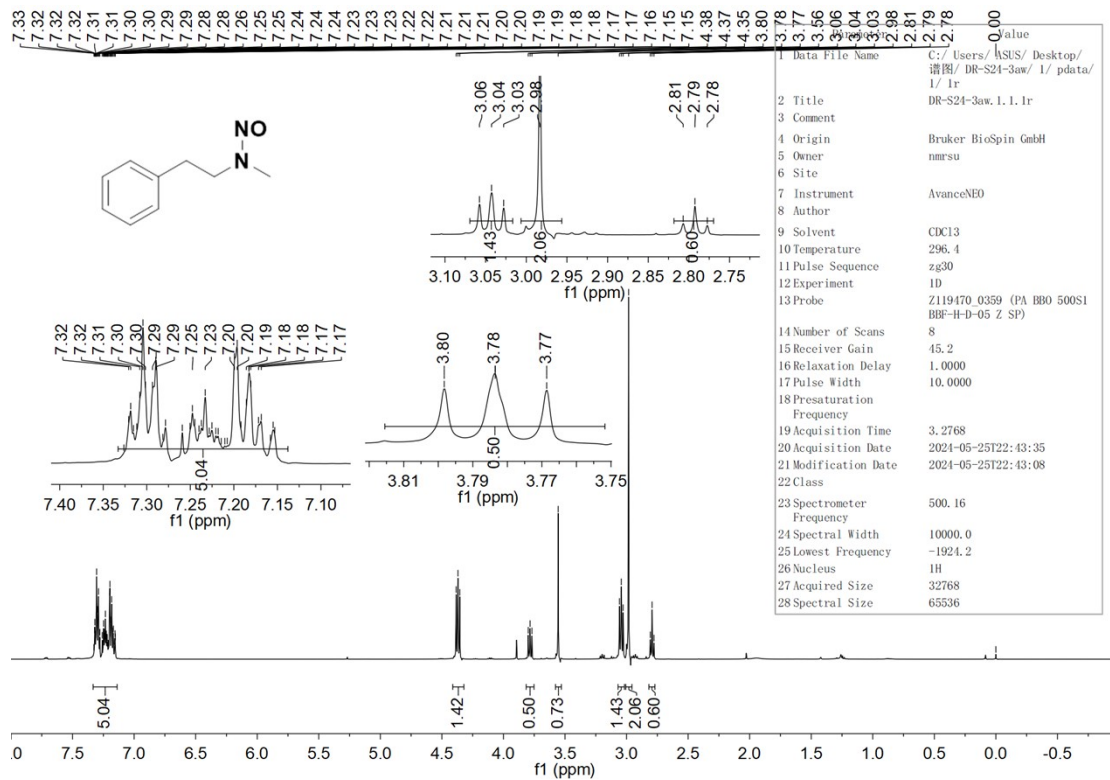

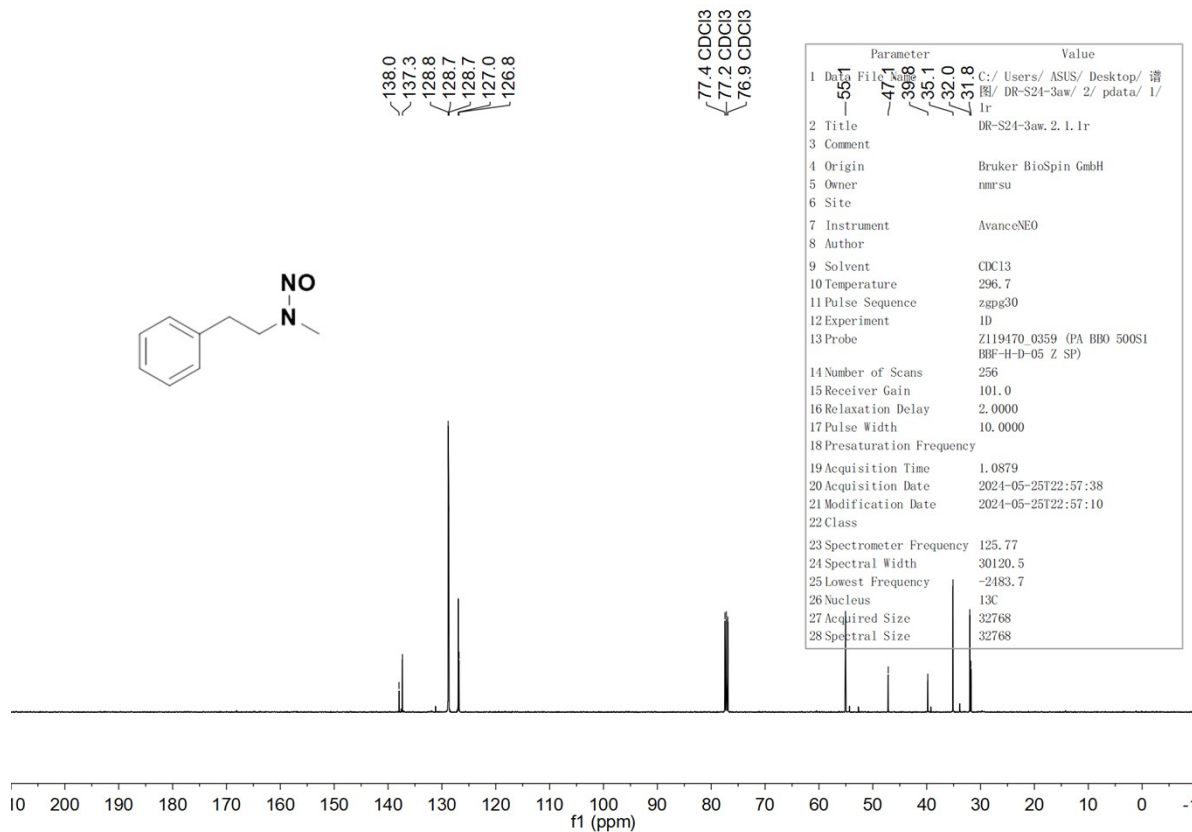

**8-chloro-11-(1-nitrosopiperidin-4-ylidene)-6,11-dihydro-5H-benzo[5,6]cyclohepta[1,2-b]pyridine(3ab)**

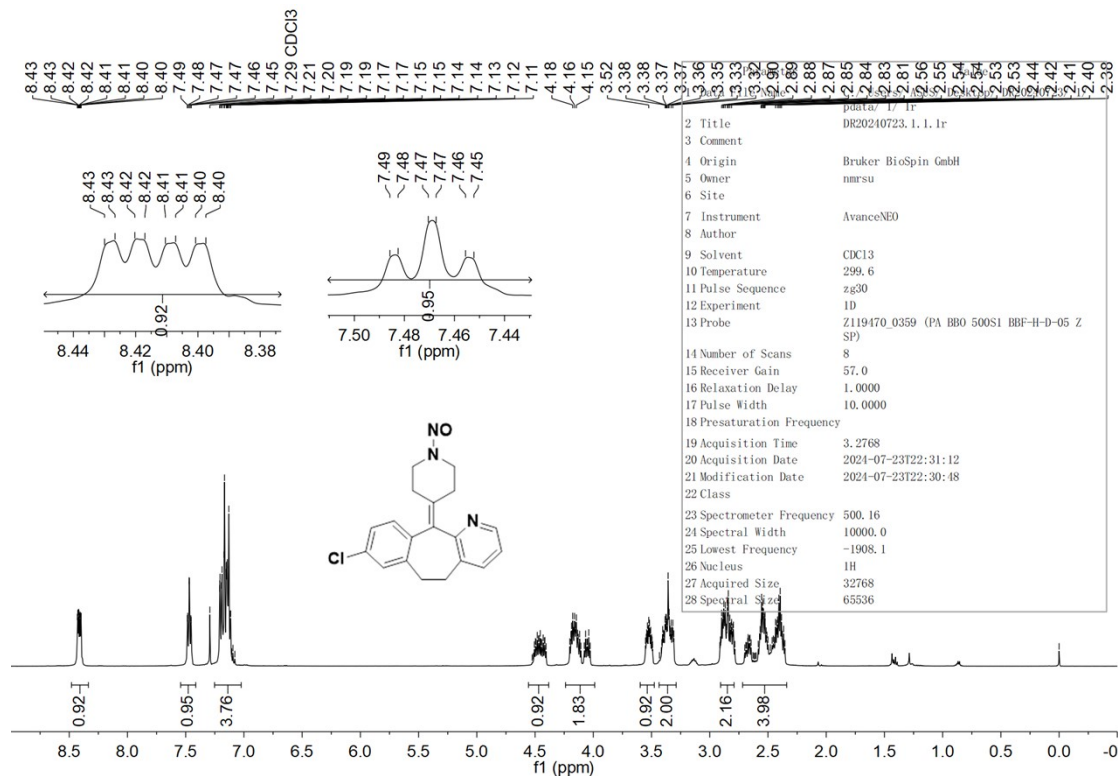

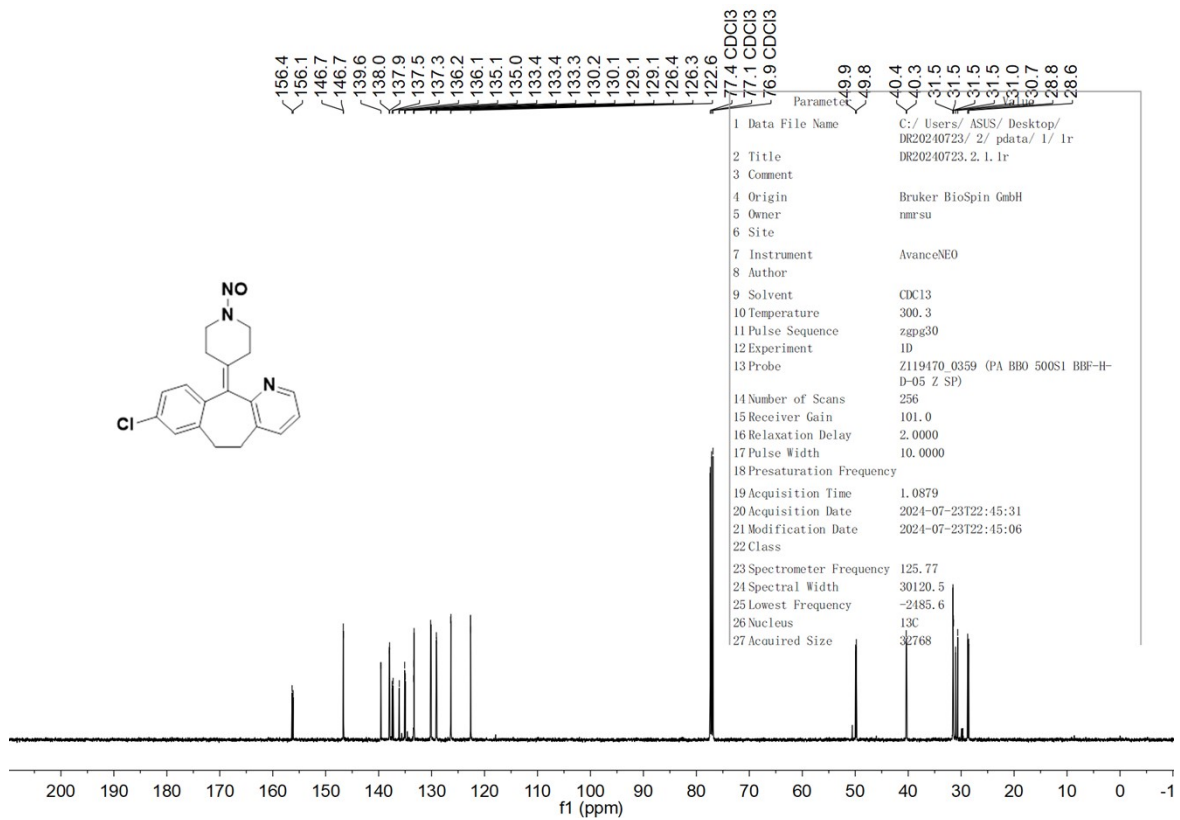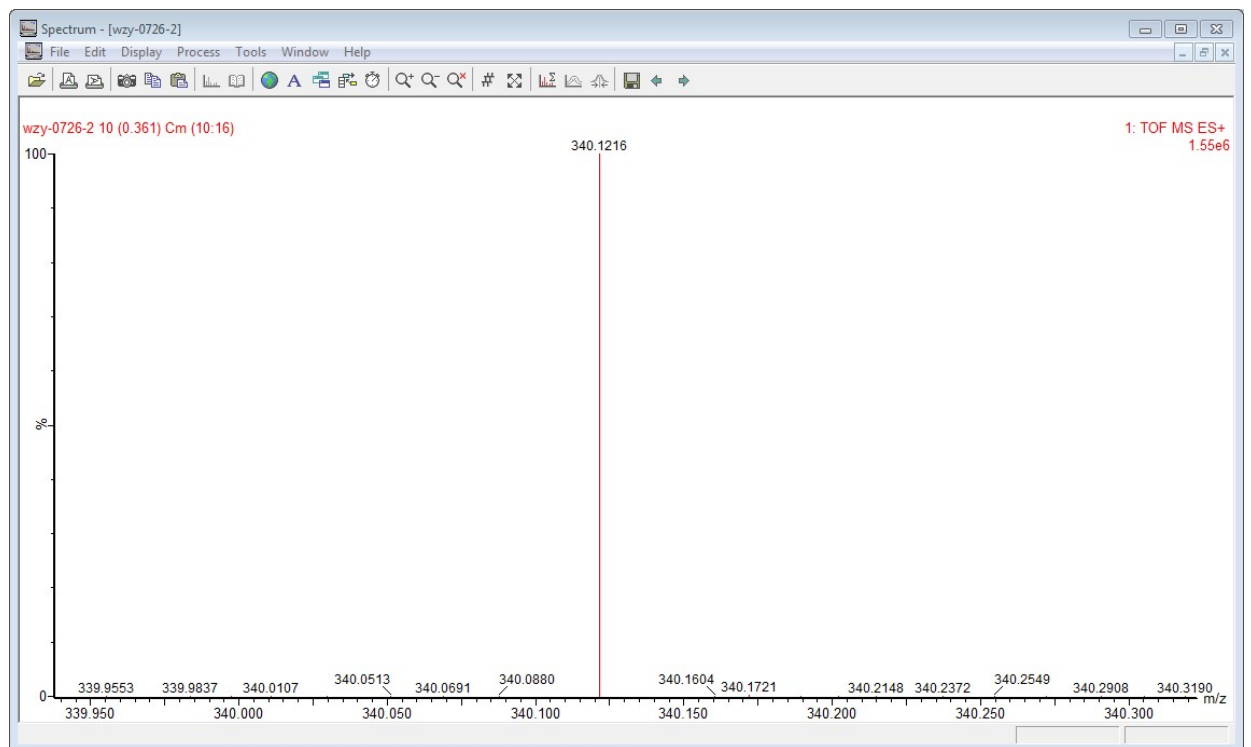

Supplement: d4cc05521g1.pdf [file d4cc05521g1.pdf]
